# Supplementary material for: A dual role for Cav1.4 Ca2+ channels in the molecular and structural organization of the rod photoreceptor synapse
Source: eLife journal article supplement (doi:10.7554/elife.62184), 2020-09-17
Supplement: fig2-data1 [file rod ribbon length.xlsx]

## Sheet: rod ribbon length
P42 WT	P42 KO	P42 KI
0.806316	0.914993	0.874327
1.10627	0.456603	0.75389
1.12179	0.654841	0.677818
0.659848	0.457094	0.56281
0.634134	0.630829	0.650199
1.34069	0.872943	0.543119
1.80485	0.456924	1.07837
1.0073	0.605501	0.960313
0.679687	0.483889	0.832412
1.79579	0.915897	0.962629
1.23195	0.862918	0.551684
0.927704	0.571979	0.620409
0.806876	0.535051	0.735943
1.1551	0.38249	0.679112
0.632416	0.564546	0.699382
0.582176	0.505633	0.865184
0.813838	0.515518	1.01427
1.73254	0.534318	0.832403
1.44324	0.591907	0.484558
0.584184	0.767511	0.614137
0.844968	0.51933	0.964987
0.934864	0.624519	0.745655
0.450096	0.414837	0.807648
1.03875	0.503477	0.77356
1.49804	0.552919	0.556559
0.894449	0.441303	1.13282
1.09321	0.808952	1.14939
1.48165	0.474384	0.707962
0.768987	0.380968	0.874563
0.750973	0.601667	0.549673
1.62194	0.996367	0.706204
0.560983	0.708025	0.495182
1.03338	0.732288	0.423711
0.617021	0.61302	0.510325
0.890022	0.523996	0.534877
0.531145	0.672185	0.604286
0.787372	0.890872	0.798818
1.19438	0.698049	0.716056
1.67316	0.547037	0.430256
1.02129	0.458953	0.90612
0.951152	0.658819	1.38483
1.26527	0.728924	0.513329
1.17678	0.574675	0.787474
1.2328	0.467941	0.823625
1.37556	0.67642	1.0324
1.109	0.867628	0.710609
1.27389	0.594959	0.660998
0.693907	0.612859	1.08572
0.552024	1.31017	0.793334
1.49638	0.43298	0.739057
0.702387	0.481391	0.633771
1.59462	0.724123	0.675591
0.903421	0.729911	1.02935
0.890917	0.711833	0.640076
1.28371	0.629165	0.555219
1.38309	0.858512	0.706775
1.28014	1.70799	0.761163
1.70086	0.795136	0.891577
1.70256	0.592044	0.788156
1.35399	0.509076	0.855256
1.93011	0.427572	0.81835
1.86831	0.452898	1.47989
0.556809	0.667189	1.15956
0.719996	0.584165	0.754125
1.01605	0.990419	0.762596
0.902325	0.522251	0.692362
1.58773	0.455804	0.733547
0.814625	0.496533	0.852626
0.653834	0.425982	1.10476
1.78207	0.526169	0.704422
0.545707	0.461242	0.54848
0.777302	0.480317	0.548179
1.77595	0.52984	0.800669
1.46879	1.20493	0.57917
1.40655	0.543973	0.423578
0.658479	0.49177	0.955373
0.487899	0.805844	1.15225
2.02061	0.687928	0.442775
1.44889	0.441554	1.30835
1.54765	0.373431	0.581106
0.933735	0.456679	0.668764
1.18151	0.551528	0.659306
0.768408	0.484587	0.820374
1.48352	0.520359	1.2572
1.41348	0.604247	0.67554
1.49201	0.813695	0.830355
1.21386	0.634796	1.06993
0.590207	0.447537	0.433562
1.27421	0.560817	0.946172
0.913049	0.537015	0.940592
1.05605	0.446798	0.434384
1.19882	0.504899	0.507015
0.777127	0.513621	0.808022
1.17016	0.681842	1.28713
1.25719	1.02904	1.00709
1.00919	0.560771	1.04788
1.52427	0.602506	0.43645
1.38863	0.564087	0.673913
1.39204	0.563968	0.345464
1.31798	0.590528	1.0516
1.32363	0.605486	1.22583
1.12327	0.835821	0.554545
0.950431	0.726895	0.614119
0.979594	0.585683	0.731137
1.6732	0.50904	0.855906
0.92782	0.497621	0.403321
1.64136	0.50232	0.581477
0.93669	0.826557	0.950479
0.527533	0.555447	1.41919
0.824118	0.582874	0.644463
0.890448	0.508599	0.860036
1.30916	0.54681	0.487842
1.18532	0.594161	0.671129
0.858306	0.55883	0.535417
1.30432	0.592667	0.476065
1.21085	0.537795	0.901019
0.669792	0.49111	0.590025
0.849397	0.858098	1.07604
0.623623	0.570894	0.449066
0.660012	0.56964	0.887725
1.23984	0.613649	0.653477
1.75582	0.539244	1.45345
0.830842	0.481971	1.8532
1.56655	0.51054	0.65005
1.39132	0.598527	0.724009
0.766602	0.556115	1.09306
1.20382	0.622177	0.852316
1.48839	0.608607	2.09116
0.714449	0.59073	0.471038
0.489051	0.514819	0.681114
2.03613	0.477044	0.526398
1.24973	0.495511	0.704533
1.31086	0.510322	0.872406
0.686112	0.578819	2.9204
0.795177	0.687639	0.764736
0.633859	0.483672	1.68553
0.90389	0.517341	0.770449
2.07209	0.823396	0.706572
1.04091	0.543192	0.998412
2.74467	0.576734	1.07636
0.714369	0.671124	0.928945
1.3331	0.532268	0.825793
1.26414	0.512	0.914099
0.832496	0.485767	0.61383
1.21239	0.631258	0.91283
0.707644	0.453011	0.959519
0.572441	0.493935	1.09659
1.51096	0.447598	1.03395
1.97967	0.494534	0.992488
1.15301	0.599015	1.11252
1.40991	0.589623	0.563346
1.26053	0.463007	0.778644
2.02248	0.492919	0.983494
1.06957	0.798308	0.625526
1.35497	0.524049	0.582826
0.801939	0.623921	0.786303
1.65221	0.963692	0.729385
1.32291	0.423696	1.61691
2.0664	0.544232	0.991387
0.802775	0.779144	1.42044
0.948141	0.43988	0.718916
1.50419	0.666882	0.854742
1.27866	0.516083	0.62958
1.34851	1.82494	1.04528
0.647992	0.609379	0.921945
1.55103	0.454644	1.03085
0.721677	0.655223	1.04035
1.17422	0.550568	0.699141
1.43723	0.452193	1.06213
1.08028	0.452069	2.57626
1.35996	0.575382	0.830282
1.42544	0.643394	0.880068
0.636721	0.46942	0.701614
1.71215	0.566733	1.37982
2.44081	0.488762	1.29543
1.5278	0.515186	0.919654
1.01344	0.69452	0.594614
1.04864	0.505525	0.763442
1.84009	0.432611	0.868254
1.3129	0.703303	0.686962
1.21832	0.547057	0.811468
1.65761	0.446629	0.858186
1.63494	0.417443	1.12619
1.68033	3.22651	1.47197
0.567462	0.42189	1.13582
1.46865	0.859962	2.12462
1.58207	0.559364	0.811329
1.64534	0.549272	0.82907
1.38116	0.566459	0.634642
1.11136	0.825163	0.685184
0.801798	0.598036	1.31751
0.993988	0.770629	0.939412
1.64569	0.474241	0.573319
1.26485	0.447334	1.07705
1.20748	0.538683	1.02129
1.57064	0.570983	1.12739
1.60663	1.53773	2.46095
1.753	0.591053	0.589091
1.52391	0.458303	0.573209
1.23442	0.481081	2.25566
0.922886	0.436787	0.942855
1.7233	0.504902	1.18852
1.8074	0.85107	3.66938
0.883386	0.574532	0.553881
0.952636	0.513868	0.604657
1.01127	0.434164	0.682853
0.999345	0.839972	0.807971
1.59405	0.413388	0.541939
0.692777	0.379258	0.549348
0.874639	0.666553	1.29431
0.584622	0.575663	1.20804
1.36998	0.772935	0.735457
1.47702	0.350306	1.05138
1.40112	0.492973	1.47925
1.19087	0.52792	0.770116
1.20311	0.54446	0.416857
1.24489	0.504007	1.01486
1.22611	0.579007	0.676738
1.47206	0.634994	0.541636
1.52303	0.537348	1.29512
1.54706	1.28816	0.57484
1.43044	0.536709	0.474878
1.22102	0.511366	0.643404
1.2244	0.512786	1.27872
1.74547	0.484899	0.616983
1.48306	0.424028	1.07332
1.60917	0.900594	1.10192
1.54397	0.493699	0.652031
2.21717	0.498124	0.588018
1.57306	0.538947	0.694909
1.45282	0.579394	1.01086
1.32263	0.704493	0.675757
1.49213	0.440785	1.28987
1.52121	0.526689	0.82758
1.7203	0.442392	0.901226
0.800068	0.413744	0.740334
1.54034	0.424947	1.00682
1.55731	0.593768	0.728507
1.54929	0.741537	1.44473
1.67979	0.570237	0.862042
1.74878	0.412615	0.71886
1.93623	0.488618	1.11348
1.67747	0.501461	1.33496
1.34171	0.949551	0.908332
1.116	0.475886	0.523131
0.775517	0.452114	0.543214
1.55008	0.574917	0.81366
1.14142	0.520511	1.23482
1.77708	1.29734	0.458799
1.07491	1.00034	1.19635
1.18397	0.708143	0.927922
1.51499	1.16804	0.393642
1.39097	0.656468	1.01763
1.23278	0.53314	0.770107
1.69694	0.497007	0.918604
1.29504	0.500705	0.455408
0.847381	0.550533	0.608361
1.5544	0.404862	2.45282
1.50833	0.566141	0.84365
2.59854	0.552949	0.482438
1.91877	0.636354	0.612442
1.7255	0.708718	0.497404
2.40214	0.503963	0.601997
1.1618	0.584412	0.982562
1.16714	0.630756	0.673773
1.18953	0.564072	1.2242
1.5318	0.646515	0.675816
2.87325	0.44344	1.12851
1.46185	0.637228	0.777088
1.00468	0.736277	0.398277
1.68056	0.61394	0.582277
0.948128	0.551343	0.588935
1.32578	0.427956	0.540819
0.794253	0.81811	0.407283
1.53514	1.2721	1.20617
1.52781	0.429177	0.468969
1.5898	0.558117	0.610242
1.67083	0.379979	0.479106
1.05098	0.519474	0.894179
1.45332	0.400501	0.547423
1.01632	0.476048	0.945505
2.10707	0.46649	0.802192
1.28308	0.807657	0.616864
0.824825	0.781969	0.46677
3.28064	0.708405	0.851994
1.61361	0.5075	0.93069
0.976324	0.481029	0.721547
0.946353	0.771369	0.618189
1.68194	0.613835	0.417767
0.577803	0.41547	1.10956
0.786141	0.430883	1.03163
1.78298	0.472288	0.805099
1.79914	0.540388	0.72934
1.52316	0.473757	0.692707
1.53556	0.419436	1.27158
2.50083	0.407864	1.39955
1.09578	0.545632	0.696457
0.437341	1.06748	1.57468
2.25671	0.601312	0.717708
0.732703	0.473293	0.706223
1.47599	0.472433	0.511414
0.78325	0.675976	0.889446
0.906986	0.454478	1.10131
2.29528	0.453467	0.880749
1.10972	0.495763	0.538342
0.723624	0.544248	0.792196
1.08463	0.42612	0.61613
0.43187	0.612568	0.821655
2.15803	0.43521	0.617994
1.02599	0.493406	0.627038
1.64458	0.404772	1.17802
1.7644	0.822688	0.512577
1.70081	0.498136	0.733527
1.75374	1.01901	1.05388
1.37415	0.52092	0.614652
1.84262	0.844473	0.965381
1.18154	0.445561	1.59437
1.61836	0.430703	0.457581
1.36815	0.491146	0.666524
1.1367	0.531041	0.539338
0.535865	0.567241	0.959197
1.02137	0.43736	1.36011
1.80579	0.51161	1.77488
4.10966	0.480668	0.561571
2.88967	0.509002	0.574307
1.77995	0.662434	0.836314
1.40335	0.609346	0.596297
2.68008	0.375974	0.736146
0.768546	0.532442	0.742822
1.39385	0.652293	0.65695
1.97467	0.656397	1.02058
0.966138	1.86088	1.00886
1.82914	0.441699	1.5503
1.00126	0.475284	0.659042
2.91953	0.395539	0.547979
1.83778	0.651617	0.640597
2.91008	0.78675	0.634102
0.727244	0.773142	0.808764
2.66195	0.523173	0.940171
1.37463	0.395467	0.604616
1.63974	0.457693	1.70283
0.947472	0.455288	0.807013
2.30801	0.513697	0.87442
0.986103	0.54347	1.06215
1.30692	0.50183	0.565025
1.31963	0.510791	0.893212
1.58281	0.447868	0.655946
3.10604	1.11915	0.760603
1.24843	0.753718	0.533398
0.877457	0.441016	0.565454
1.44809	0.552537	0.549577
1.68481	0.846836	0.658746
1.07488	0.480052	0.716714
1.74108	0.788939	0.689199
2.16725	0.531688	0.799224
1.9353	0.738497	0.751016
1.4031	0.607143	0.626828
1.89744	0.384123	0.806778
1.22857	0.504344	1.38995
2.05507	0.49953	0.796257
1.73054	0.581162	0.930781
1.03112	0.545656	0.868995
0.63706	0.439825	0.787162
1.60382	0.475417	1.2255
1.75542	0.416232	0.843236
1.23992	0.482437	0.846172
4.22158	0.427138	0.833789
0.983179	0.433256	1.20586
1.68859	0.465655	0.633102
1.81831	0.427818	0.596642
0.722303		1.48213
1.50558		0.897832
1.68914		0.874885
0.434069		1.45656
1.88272		0.805642
0.93355		0.611439
1.60791		0.675247
0.572157		1.12398
1.04673		0.816052
1.06354		0.531724
1.64012		0.649509
2.32463		0.513886
2.27498		0.583314
0.66471		0.73364
1.58457		1.00943
0.781961		1.02084
1.69797		0.873162
0.797831		0.643765
0.876689		1.02769
1.53399		0.667131
1.07994		0.744087
0.981037		0.817204
0.569301		1.3308
0.507937		0.934542
1.52575		0.833571
0.722263		0.606056
0.498548		2.49905
0.956688		0.920338
1.56652		0.633279
0.680738		1.34369
0.920697		0.819215
0.758319		0.865582
0.984035		0.781453
1.21859		0.832243
1.22314		0.818598
1.5603		1.25164
0.84015		1.0057
2.06684		0.820031
0.622522		0.714072
1.19762		1.20366
0.466884		0.6312
0.512633		1.28618
0.88797		1.03437
1.38246		0.716862
1.18529		1.38256
1.00217		0.915417
0.448642		0.751373
0.762432		0.885104
0.794114		0.893553
2.41209		0.804359
1.52765		1.82639
1.11932		0.69985
1.09669		0.683313
0.772844		1.72538
1.60034		1.2119
0.670958		0.791522
0.469215		0.717709
0.944922		0.807409
1.78077		0.824771
0.819423		0.68633
1.06742		0.769553
1.76204		0.488887
0.975813		0.727038
1.13807		1.04495
1.23473		0.517852
0.528136		0.718319
0.937601		0.691096
1.66371		0.755819
0.695961		1.18477
1.22063		1.11488
0.474278		1.0018
0.772217		0.960623
0.652657		0.821584
0.603809		0.676115
0.721955		0.883351
1.07024		0.735052
1.20358		0.65609
1.3661		0.88665
0.915774		0.463758
2.56019		1.93761
0.496659		0.649211
1.13351		0.559852
1.15005		0.720324
1.26927		0.540257
1.09363		1.12123
1.4095		1.12362
1.00262		1.05771
1.05574		0.644489
1.41013		0.679863
1.46429		1.71949
1.82756		0.647002
0.924474		0.769192
0.606074		0.973023
0.944665		0.701172
0.630305		0.843863
0.612409		0.597313
1.62446		1.32943
0.664654		1.76404
1.13442		1.2292
1.63215		0.731213
0.618614		1.16741
1.76282		0.892549
1.04669		0.52882
0.736274		1.06705
1.1885		0.420678
0.528273		0.792369
0.634418		1.08466
1.27121		1.02618
0.958246		0.809015
0.46805		0.744435
1.39388		1.07775
1.14424		0.651974
1.22149		1.54719
0.832989		0.991652
1.59886		0.605617
0.652327		1.38559
0.49619		0.461514
0.927575		1.51262
1.26149		0.67773
2.01058		0.422749
1.39403		1.03723
1.62053		0.925642
1.29351		0.860843
1.11121		1.18993
0.465295		0.444955
0.996617		0.630137
0.962214		0.871998
0.712845		1.74031
0.824559		0.516945
0.957434		1.06864
1.06566		0.660544
1.06366		0.465891
1.71978		0.753566
0.668568		0.832727
0.9267		0.849599
1.87568		1.08096
1.74324		1.019
1.44787		0.411757
0.938225		0.485674
1.3905		0.916167
1.55937		0.84971
1.90707		0.801317
0.632107		0.993029
1.0349		1.06804
1.2981		0.548365
0.963728		1.72731
0.579491		0.699977
0.768509		1.30838
0.527479		1.37764
1.35269		1.90508
0.800597		0.635164
1.03612		1.02281
1.3688		0.727256
0.907233		1.08166
1.41794		0.987051
0.807347		0.66708
1.40938		1.05274
1.33064		0.926492
0.894657		0.550681
1.80335		0.670578
0.824665		0.660674
1.62846		0.502491
1.46115		0.730588
1.19823		0.646584
0.928244		0.471526
1.76706		0.611457
1.37918		1.21182
1.17124		0.669933
0.735444		0.570528
1.20187		1.50607
0.612722		1.05109
1.19905		0.841084
1.95982		2.30692
1.83183		1.08124
1.42882		1.0671
1.74925		0.733212
1.61038		1.43282
0.752589		0.798251
1.28052		0.433305
1.41353		1.35953
1.81		0.449915
0.396452		0.543874
0.620449		0.990389
1.48671		0.469775
1.31364		1.25539
1.13761		1.15724
1.32682		0.881091
1.90806		0.773293
0.988321		0.755817
1.75613		0.823643
1.96544		1.00165
1.86263		0.565546
1.87319		1.0958
1.25109		0.809693
0.583832		0.930496
2.03789		1.60499
1.41674		1.97331
1.85273		0.789178
1.26914		0.931846
1.2012		1.0433
1.69853		1.22276
0.713076		0.978309
1.6409		0.805512
1.5889		0.387819
1.7989		0.863123
0.572113		0.541199
0.831021		1.4596
1.32476		1.16944
0.412939		0.706076
0.403918		0.5586
0.621571		0.970277
0.901522		0.912813
1.76857		0.438727
1.18343		0.609248
1.12462		0.503488
0.712758		0.936614
1.09313		0.688018
0.821538		1.83875
1.95216		0.676812
0.41933		0.891374
1.42378		1.15458
1.30953		0.686982
0.536845		1.35785
1.69957		1.009
1.86274		0.519461
0.921252		0.655854
1.0612		0.832688
0.621395		1.12537
1.64639		0.548102
0.445859		1.04738
0.625189		1.48865
0.705376		0.88158
1.00416		0.97823
1.50578		0.76177
0.575079		1.04843
1.64241		0.572602
0.769148		0.543659
1.04445		0.477175
2.1566		0.517916
0.80683		0.461604
0.947462		0.791846
1.06044		1.23777
0.917617		0.823956
1.04761		0.56938
0.98649		0.862723
1.24272		0.7049
1.24965		1.3004
0.973852		0.810582
0.956777		0.465826
1.35252		0.712274
1.21866		0.732091
0.569664		0.635273
1.06968		0.693934
0.586984		0.704135
1.57052		0.902776
0.695895		0.765706
0.974267		1.18755
1.34088		0.739121
0.872443		1.47711
1.59913		0.563142
1.28169		0.792485
1.26185		0.568385
1.56407		1.02849
0.769697		0.514344
0.67883		1.49692
1.40314		0.490122
0.791074		0.702599
0.790255		0.763902
1.66291		0.612543
0.635806		0.605319
1.51228		1.08566
0.841202		0.861612
1.41496		0.632099
1.62057		0.527676
1.66618		0.714378
1.86837		0.770528
1.22673		2.47592
0.639014		0.634064
0.611781		0.98609
0.648369		1.12908
0.581152		0.475354
1.28788		0.567486
1.59553		1.45099
1.44033		1.16083
0.729151		0.565341
0.560054		1.37731
1.29445		3.08919
0.594011		0.82969
1.11244		1.17432
1.16256		1.04426
1.03014		0.774191
1.02281		0.686565
0.401183		0.914293
0.804687		0.620471
1.59814		0.710225
0.493332		0.807767
0.765977		0.774829
0.823697		0.643884
1.7149		0.427702
0.675326		1.04319
0.833718		1.0094
0.884617		0.371392
1.49184		0.910389
1.23022		0.491095
0.42968		0.714182
0.77916		0.641066
1.44984		0.677979
1.4556		0.891693
1.57524		0.756419
2.30284		0.716854
0.633124		0.561998
0.966083		1.01901
0.753279		1.46646
0.689883		0.978788
0.600475		0.559457
0.701295		1.0271
0.881524		1.36355
0.769148		0.681444
0.740076		0.940885
0.915735		0.459522
0.664584		1.15663
0.508869		1.02699
1.84742		0.904993
0.810739		1.03203
0.586796		0.837788
1.11395		0.928896
0.93071		0.660932
0.404362		0.915968
0.860191		0.555412
0.878438		1.90486
0.549361		0.619202
1.40963		0.99748
0.599043		0.864728
0.835325		0.619261
0.567971		0.947542
1.11367		0.747042
1.69489		0.497462
0.788942		0.689977
0.599135		0.503254
0.72761		0.871139
1.52612		0.84958
0.773363		0.659264
0.645288		0.775147
0.97234		0.898758
0.54436		0.535738
0.660026		0.624908
0.845666		1.33035
1.80937		0.690486
1.09437		1.56281
0.753352		0.793707
0.642154		0.512263
0.729395		0.510768
0.616134		0.779292
1.30213		1.05383
0.912357		0.616271
2.23422		1.12916
0.954129		0.579038
0.800143		0.623224
1.47135		0.504616
1.89847		1.28993
0.721102		0.685665
1.22983		1.20037
0.749732		0.772151
1.16738		0.790178
1.19702		1.40988
0.611249		1.3693
0.943633		0.496883
0.720065		0.965122
1.18408		1.10612
1.02066		0.627784
1.58764		0.980666
1.95724		0.846782
1.42305		0.555647
0.76173		0.621322
2.05035		0.983426
0.440352		0.718188
0.974396		1.21642
1.22738		0.891825
1.21186		0.750326
0.830275		0.779958
1.33877		0.748807
1.109		1.56049
1.7654		1.05999
1.79314		1.11649
0.546308		1.43148
0.482043		1.10791
0.512666		0.522497
0.863303		0.660335
1.21078		1.05606
0.675361		1.21937
0.493368		0.802336
0.825696		1.03792
1.07846		0.879228
0.953553		0.880778
0.881448		0.80181
1.67653		0.366912
1.69016		0.946885
0.51894		1.53001
1.92348		1.89454
1.1169		0.863369
0.721102		0.612752
1.60904		0.557212
1.14595		1.1657
0.680252		0.723985
0.59948		0.69854
0.538546		0.973906
0.971787		0.886108
1.77159		0.44848
0.625435		0.606279
0.658032		1.43462
1.40057		0.815461
1.13343		0.537663
1.81508		0.971907
1.42447		0.895175
0.93409		0.508544
0.948985		0.996698
0.826498		0.938088
1.14092		1.01644
1.61101		0.754836
1.3814		0.723906
1.26719		0.883296
0.727002		0.732833
1.75216		1.17181
0.901276		1.93193
0.574384		0.666958
1.83375		1.21706
1.59254		0.788232
0.57535		1.21058
1.40014		0.560684
1.10422		0.898616
0.62773		0.718868
1.04181		0.608442
1.76312		1.35968
1.15651		0.860341
1.54896		1.65413
0.992207		0.697443
1.15791		1.33558
1.32023		0.781732
1.18702		0.955514
1.34457		0.66214
0.551036		0.704217
1.34714		0.699495
1.49655		0.910585
1.18721		0.572007
1.94848		0.801766
1.75625		1.06308
1.26355		0.634078
1.03204		1.22511
1.47394		1.55185
1.59401		0.910181
1.31689		1.0037
1.26914		0.609264
1.02836		1.08304
1.35617		0.736251
1.47652		0.48822
0.542955		0.666467
1.47984		0.936401
1.56569		1.09411
1.44464		0.69844
0.913379		0.830944
1.03634		0.842681
0.905157		1.9262
1.54142		0.854703
1.14246		0.53773
1.04747		0.735111
1.45134		0.614688
1.41247		1.50497
1.24086		0.899445
1.66984		1.79725
1.33562		0.869517
1.84877		0.401794
1.70733		0.506767
0.893328		0.790893
1.20464		0.427279
1.48186		0.517071
1.07771		0.813954
1.3325		0.77155
1.49814		0.613267
1.47905		0.538154
0.640672		0.62341
1.04578		1.14668
2.04983		0.845559
1.64187		0.560374
1.18649		1.33368
1.11917		0.978036
1.88745		0.602659
0.581425		1.24173
1.49436		0.758731
0.794043		0.803058
0.831717		0.665968
1.91553		1.18225
1.26043		1.62841
1.19047		1.60058
1.66299		0.837191
0.795401		0.67263
0.649201		0.592642
1.08807		1.09634
1.55733		0.5338
1.92748		0.483936
0.759849		1.03781
0.590372		0.739345
0.844708		1.11678
0.472968		1.23452
2.27963		0.743545
1.02275		0.567604
1.96926		0.980621
1.05438		0.735518
0.650093		0.941365
1.21583		0.630643
0.730181		0.582662
1.50671		0.727003
1.52164		0.873859
0.850778		1.05743
1.08935		0.647717
1.2106		0.623378
1.57918		1.07881
2.11483		1.39532
1.18369		0.805778
1.04958		0.620126
1.26188		1.00245
1.10956		0.547013
0.593969		1.19698
1.23963		0.4977
0.654862		0.634151
1.11365		1.33326
0.852937		0.513605
1.60249		0.824447
0.576132		0.465433
1.03235		0.746196
1.67805		0.752543
1.2633		0.480886
1.48788		0.808046
1.67815		0.384767
0.792775		1.57278
0.826531		0.977695
1.60941		0.481724
0.902734		0.587395
1.33302		1.22081
1.16258		0.90227
1.13491		2.46709
1.46267		1.03543
1.19681		0.59821
0.851432		0.81574
1.26069		0.864437
1.38689		0.66616
1.5045		0.743374
0.636014		0.478986
1.72986		0.791045
1.56862		0.997424
1.73101		0.853439
1.04371		0.556902
0.687116		0.677922
0.701165		0.703821
0.873316		0.753159
1.753		0.450616
0.801453		0.560459
0.620012		0.997612
0.76909		0.684977
0.607556		1.14088
0.670615		1.23071
1.62817		0.561948
1.5327		1.16402
0.638887		0.796319
1.20082		0.636192
0.754863		0.731848
1.33649		0.77691
1.59532		0.847842
1.57443		0.663213
1.78766		0.522049
1.58799		0.927638
1.4978		0.823087
1.33795		0.421371
1.2612		1.11418
1.33488		0.536507
1.29462		0.539761
1.84024		0.735185
1.49194		1.25207
1.9596		1.01611
1.01741		0.722381
1.27212		1.06359
1.5755		0.68772
0.620553		0.534369
0.731459		0.854645
1.45276		1.38712
1.03936		0.825868
0.899709		0.608028
0.929092		0.998661
1.06509		0.687151
0.750561		0.812653
1.10859		1.14484
0.837233		1.12155
1.57758		0.907929
1.50415		0.661096
1.00525		1.00243
1.13359		0.516555
1.21048		0.873756
1.54133		0.746592
0.620052		0.903489
0.924649		1.01547
0.705311		0.677575
1.29362		0.8978
1.16909		0.719917
0.896099		0.658068
1.50458		0.70938
0.745539		0.769716
0.775838		0.562701
1.5891		1.20011
0.623453		0.541792
1.33425		0.744123
0.998747		0.466613
0.665993		1.72408
1.7672		0.453659
0.689176		0.643225
1.19761		0.685264
0.792999		0.73675
1.1229		0.909805
1.34046		0.657767
0.43954		0.799499
1.3329		0.963668
1.42496		0.517442
1.32794		1.01648
1.20252		0.770905
1.53294		0.782322
0.518276		0.734207
0.675462		1.07663
0.721742		0.709467
0.796725		1.17983
0.653438		0.720755
0.638113		1.61352
0.513266		0.570574
1.46264		0.98206
0.786568		0.924681
0.810894		0.876644
1.36652		0.964804
1.02836		0.662318
0.440836		0.602008
1.6456		0.866926
0.92962		0.661716
0.754194		0.929082
1.60968		0.778162
1.97162		0.730924
0.661006		0.922335
0.992304		0.86447
1.03023		0.567383
0.923753		0.638341
0.908838		0.43142
1.00744		0.730907
1.42526		0.66738
1.24335		1.11855
1.38518		0.484909
1.11934		0.490718
1.20082		0.969071
1.94058		0.798999
1.41658		1.30323
1.54189		1.47322
1.23989		0.921568
1.34027		0.883266
1.72576		0.659733
1.40347		0.678761
1.36062		0.56397
1.57035		1.1876
1.13182		0.654415
0.68809		0.768428
0.671669		1.02155
0.831139		0.43069
0.688402		0.484085
1.90205		0.660545
1.35794		0.466124
3.001		0.668743
1.07557		0.633808
1.17453		0.874977
0.955578		1.06201
2.53956		0.743247
1.29593		0.855391
0.890933		0.971601
1.26129		0.835317
1.7867		0.694808
1.11032		0.679551
1.43697		0.585514
1.2005		0.461599
1.00686		0.585286
1.59331		0.460578
1.57244		0.462102
1.58301		1.25128
1.37723		0.845888
0.902392		1.22982
0.596102		1.03778
0.434555		0.747688
0.909633		0.671806
0.840732		0.507636
1.45104		0.77022
1.07447		0.476353
0.63302		0.486443
1.72194		0.476733
1.15561		1.10912
0.851013		1.7016
0.909214		0.613009
1.1218		1.05246
0.532949		1.5074
1.15599		1.12149
1.6143		0.597852
0.479876		1.06508
0.530908		0.738168
0.810719		0.58915
1.01918		0.682618
0.567018		0.765973
0.57313		2.62099
1.52989		2.26675
0.690155		0.837507
0.560336		2.76458
1.47129		1.20232
0.792861		0.73086
0.504972		0.938109
1.66711		1.03256
0.527838		0.746242
0.463694		0.523915
0.695781		1.28072
1.17379		1.02357
0.57847		0.512329
0.428001		0.600757
0.777606		0.894003
0.834061		0.650856
0.689296		1.05007
1.12131		0.799931
0.809809		1.1888
1.39117		0.689197
0.663548		0.752825
1.51507		1.18918
1.11327		1.11224
0.978418		0.700583
1.21792		0.818125
1.56339		1.54048
0.660837		0.529743
1.01967		0.471498
0.575152		0.698447
1.65555		0.717384
1.0319		1.28271
1.38562		0.572891
0.960889		0.700922
0.460459		0.576971
0.67746		0.641238
2.06798		0.587682
0.776958		0.838021
0.917024		0.564213
2.34159		0.820423
0.883516		0.706137
1.12988		0.687245
1.02228		0.633895
0.803573		0.517817
1.15609		0.524511
0.752153		0.583678
1.57293		0.651007
1.6616		0.42274
1.92154		1.03074
1.2721		0.752972
1.53598		0.507885
1.38255		0.409248
0.961662		0.581702
0.586004		0.927162
0.921859		1.1375
1.27771		1.35792
1.72955		0.683399
1.72526		1.25868
1.82391		0.652146
0.498862		0.687022
1.78168		0.561783
1.28653		0.94973
0.896947		0.602621
1.47588		0.479705
0.760189		0.520642
0.936423		0.73163
1.06018		0.442324
1.38703		0.777418
1.36595		0.617806
1.05044		0.75635
1.06326		1.23444
1.31327		0.760585
1.60815		0.817761
1.61099		0.751594
1.41427		0.391086
0.760235		0.949972
0.614489		0.692626
1.15321		0.663963
1.08446		0.832511
1.04729		1.11643
0.914111		0.934149
3.28187		0.553896
1.52606		0.637146
1.65231		0.987618
1.52414		1.06059
1.2659		0.525315
1.31115		0.467192
1.64186		0.729976
0.586676		0.804385
1.71276		0.46164
1.71096		0.48664
1.71168		0.936288
1.87297		1.09138
1.96242		0.588305
2.04714		0.808822
0.630642		0.724669
1.95051		0.783234
0.436147		0.696972
1.66241		0.544477
0.883646		1.16455
1.38779		0.863008
1.34266		0.853565
0.902921		1.2131
0.714093		0.49346
1.64754		1.18573
0.732743		0.457245
1.30466		0.751751
1.31755		0.410885
1.41899		1.54747
1.14534		0.798826
0.945399		0.66012
1.07403		0.614141
0.771108		1.06337
1.8774		0.690338
0.833685		0.646479
0.733778		1.02811
0.950428		0.948211
2.46861		0.72476
1.25995		1.27464
1.77015		0.459585
1.42733		0.772225
0.548536		1.0281
1.43028		0.423135
0.806651		0.584531
0.753943		0.467293
1.29235		0.545319
1.79737		1.64676
0.747484		0.961573
0.794154		1.1811
1.19009		1.12838
1.0874		0.567228
1.37016		0.845379
1.48039		0.642905
0.696216		0.505597
1.18074		0.959233
1.65133		0.648988
1.74184		0.647239
1.09431		0.444927
1.61444		0.6617
1.15072		1.38835
1.49544		0.888697
1.02687		0.529017
1.45924		1.06069
1.14891		0.694647
0.856939		1.05222
0.922311		0.635317
0.692544		0.552972
0.670152		0.581672
1.65725		0.937151
1.7668		0.953313
0.931946		0.708485
1.36494		1.04591
0.82865		0.725761
1.59257		0.893499
1.34842		0.787465
1.55818		1.45489
0.935494		2.75194
0.984878		0.584969
1.44703		0.651703
1.09226		1.74016
0.538341		0.930725
2.08081		0.700685
1.79875		0.440738
1.95073		0.564464
0.953169		0.837166
1.72253		0.787761
0.756997		2.16602
1.61133		0.508492
1.41638		0.498875
0.814232		0.876452
0.916943		0.704853
0.652971		0.879716
1.06106		0.659321
0.710311		0.471449
0.751372		1.46006
1.52499		0.687849
0.86592		0.773709
1.86058		0.78768
1.94865		0.596662
0.56105		0.811322
0.893452		0.905154
1.99116		0.951631
1.68153		0.913634
1.72799		0.763015
0.618151		0.907935
1.65987		1.03548
2.06564		1.54032
0.89195		0.830854
1.90207		0.635088
1.06278		0.850672
2.08959		0.820133
1.6866		0.829547
1.13097		0.605629
		0.571739
		0.551968
		0.396904
		0.776827
		0.460597
		0.776073
		0.662608
		1.01314
		0.632697
		0.49885
		0.484656
		0.913472
		0.505141
		0.868939
		0.605215
		1.01032
		0.796545
		0.718353
		1.04979
		0.809128
		1.14213
		0.731281
		1.14291
		0.783856
		0.571955
		0.751151
		0.8435
		0.571019
		0.754294
		0.626644
		0.725801
		1.03488
		0.949949
		0.523431
		0.860935
		0.496103
		0.634389
		0.779665
		0.826373
		0.688959
		0.776624
		0.771973
		0.814303
		1.10699
		1.15321
		0.960973
		0.712882
		1.09993
		0.661107
		0.447345
		1.01052
		0.801779
		0.757452
		0.865663
		1.46024
		0.610876
		0.684202
		0.517254
		0.64241
		0.53268
		0.738089
		1.42628
		0.588036
		1.00007
		0.502429
		0.548404
		0.7725
		0.920173
		0.632789
		0.545404
		2.07964
		1.26277
		1.06753
		0.915135
		0.55324
		0.518664
		0.703899
		0.454391
		0.901745
		0.582012
		0.948462
		0.826359
		0.757353
		0.832703
		1.00986
		0.685534
		0.623067
		0.963276

## Sheet: identify outliers 
	P42 WT	P42 KO	P42 KI
Method
ROUT (Q = 1%)
Number of points
# Y values analyzed	1268	370	1356
Outliers	4	22	34
Cleaned data
P42 WT	P42 KO	P42 KI
0.806316		0.874327
1.10627	0.456603	0.75389
1.12179	0.654841	0.677818
0.659848	0.457094	0.56281
0.634134	0.630829	0.650199
1.34069	0.872943	0.543119
1.80485	0.456924	1.07837
1.0073	0.605501	0.960313
0.679687	0.483889	0.832412
1.79579		0.962629
1.23195	0.862918	0.551684
0.927704	0.571979	0.620409
0.806876	0.535051	0.735943
1.1551	0.38249	0.679112
0.632416	0.564546	0.699382
0.582176	0.505633	0.865184
0.813838	0.515518	1.01427
1.73254	0.534318	0.832403
1.44324	0.591907	0.484558
0.584184	0.767511	0.614137
0.844968	0.51933	0.964987
0.934864	0.624519	0.745655
0.450096	0.414837	0.807648
1.03875	0.503477	0.77356
1.49804	0.552919	0.556559
0.894449	0.441303	1.13282
1.09321	0.808952	1.14939
1.48165	0.474384	0.707962
0.768987	0.380968	0.874563
0.750973	0.601667	0.549673
1.62194		0.706204
0.560983	0.708025	0.495182
1.03338	0.732288	0.423711
0.617021	0.61302	0.510325
0.890022	0.523996	0.534877
0.531145	0.672185	0.604286
0.787372	0.890872	0.798818
1.19438	0.698049	0.716056
1.67316	0.547037	0.430256
1.02129	0.458953	0.90612
0.951152	0.658819	1.38483
1.26527	0.728924	0.513329
1.17678	0.574675	0.787474
1.2328	0.467941	0.823625
1.37556	0.67642	1.0324
1.109	0.867628	0.710609
1.27389	0.594959	0.660998
0.693907	0.612859	1.08572
0.552024		0.793334
1.49638	0.43298	0.739057
0.702387	0.481391	0.633771
1.59462	0.724123	0.675591
0.903421	0.729911	1.02935
0.890917	0.711833	0.640076
1.28371	0.629165	0.555219
1.38309	0.858512	0.706775
1.28014		0.761163
1.70086	0.795136	0.891577
1.70256	0.592044	0.788156
1.35399	0.509076	0.855256
1.93011	0.427572	0.81835
1.86831	0.452898	1.47989
0.556809	0.667189	1.15956
0.719996	0.584165	0.754125
1.01605		0.762596
0.902325	0.522251	0.692362
1.58773	0.455804	0.733547
0.814625	0.496533	0.852626
0.653834	0.425982	1.10476
1.78207	0.526169	0.704422
0.545707	0.461242	0.54848
0.777302	0.480317	0.548179
1.77595	0.52984	0.800669
1.46879		0.57917
1.40655	0.543973	0.423578
0.658479	0.49177	0.955373
0.487899	0.805844	1.15225
2.02061	0.687928	0.442775
1.44889	0.441554	1.30835
1.54765	0.373431	0.581106
0.933735	0.456679	0.668764
1.18151	0.551528	0.659306
0.768408	0.484587	0.820374
1.48352	0.520359	1.2572
1.41348	0.604247	0.67554
1.49201	0.813695	0.830355
1.21386	0.634796	1.06993
0.590207	0.447537	0.433562
1.27421	0.560817	0.946172
0.913049	0.537015	0.940592
1.05605	0.446798	0.434384
1.19882	0.504899	0.507015
0.777127	0.513621	0.808022
1.17016	0.681842	1.28713
1.25719		1.00709
1.00919	0.560771	1.04788
1.52427	0.602506	0.43645
1.38863	0.564087	0.673913
1.39204	0.563968	0.345464
1.31798	0.590528	1.0516
1.32363	0.605486	1.22583
1.12327	0.835821	0.554545
0.950431	0.726895	0.614119
0.979594	0.585683	0.731137
1.6732	0.50904	0.855906
0.92782	0.497621	0.403321
1.64136	0.50232	0.581477
0.93669	0.826557	0.950479
0.527533	0.555447	1.41919
0.824118	0.582874	0.644463
0.890448	0.508599	0.860036
1.30916	0.54681	0.487842
1.18532	0.594161	0.671129
0.858306	0.55883	0.535417
1.30432	0.592667	0.476065
1.21085	0.537795	0.901019
0.669792	0.49111	0.590025
0.849397	0.858098	1.07604
0.623623	0.570894	0.449066
0.660012	0.56964	0.887725
1.23984	0.613649	0.653477
1.75582	0.539244	1.45345
0.830842	0.481971
1.56655	0.51054	0.65005
1.39132	0.598527	0.724009
0.766602	0.556115	1.09306
1.20382	0.622177	0.852316
1.48839	0.608607
0.714449	0.59073	0.471038
0.489051	0.514819	0.681114
2.03613	0.477044	0.526398
1.24973	0.495511	0.704533
1.31086	0.510322	0.872406
0.686112	0.578819
0.795177	0.687639	0.764736
0.633859	0.483672	1.68553
0.90389	0.517341	0.770449
2.07209	0.823396	0.706572
1.04091	0.543192	0.998412
2.74467	0.576734	1.07636
0.714369	0.671124	0.928945
1.3331	0.532268	0.825793
1.26414	0.512	0.914099
0.832496	0.485767	0.61383
1.21239	0.631258	0.91283
0.707644	0.453011	0.959519
0.572441	0.493935	1.09659
1.51096	0.447598	1.03395
1.97967	0.494534	0.992488
1.15301	0.599015	1.11252
1.40991	0.589623	0.563346
1.26053	0.463007	0.778644
2.02248	0.492919	0.983494
1.06957	0.798308	0.625526
1.35497	0.524049	0.582826
0.801939	0.623921	0.786303
1.65221		0.729385
1.32291	0.423696	1.61691
2.0664	0.544232	0.991387
0.802775	0.779144	1.42044
0.948141	0.43988	0.718916
1.50419	0.666882	0.854742
1.27866	0.516083	0.62958
1.34851		1.04528
0.647992	0.609379	0.921945
1.55103	0.454644	1.03085
0.721677	0.655223	1.04035
1.17422	0.550568	0.699141
1.43723	0.452193	1.06213
1.08028	0.452069
1.35996	0.575382	0.830282
1.42544	0.643394	0.880068
0.636721	0.46942	0.701614
1.71215	0.566733	1.37982
2.44081	0.488762	1.29543
1.5278	0.515186	0.919654
1.01344	0.69452	0.594614
1.04864	0.505525	0.763442
1.84009	0.432611	0.868254
1.3129	0.703303	0.686962
1.21832	0.547057	0.811468
1.65761	0.446629	0.858186
1.63494	0.417443	1.12619
1.68033		1.47197
0.567462	0.42189	1.13582
1.46865	0.859962
1.58207	0.559364	0.811329
1.64534	0.549272	0.82907
1.38116	0.566459	0.634642
1.11136	0.825163	0.685184
0.801798	0.598036	1.31751
0.993988	0.770629	0.939412
1.64569	0.474241	0.573319
1.26485	0.447334	1.07705
1.20748	0.538683	1.02129
1.57064	0.570983	1.12739
1.60663
1.753	0.591053	0.589091
1.52391	0.458303	0.573209
1.23442	0.481081
0.922886	0.436787	0.942855
1.7233	0.504902	1.18852
1.8074	0.85107
0.883386	0.574532	0.553881
0.952636	0.513868	0.604657
1.01127	0.434164	0.682853
0.999345	0.839972	0.807971
1.59405	0.413388	0.541939
0.692777	0.379258	0.549348
0.874639	0.666553	1.29431
0.584622	0.575663	1.20804
1.36998	0.772935	0.735457
1.47702	0.350306	1.05138
1.40112	0.492973	1.47925
1.19087	0.52792	0.770116
1.20311	0.54446	0.416857
1.24489	0.504007	1.01486
1.22611	0.579007	0.676738
1.47206	0.634994	0.541636
1.52303	0.537348	1.29512
1.54706		0.57484
1.43044	0.536709	0.474878
1.22102	0.511366	0.643404
1.2244	0.512786	1.27872
1.74547	0.484899	0.616983
1.48306	0.424028	1.07332
1.60917	0.900594	1.10192
1.54397	0.493699	0.652031
2.21717	0.498124	0.588018
1.57306	0.538947	0.694909
1.45282	0.579394	1.01086
1.32263	0.704493	0.675757
1.49213	0.440785	1.28987
1.52121	0.526689	0.82758
1.7203	0.442392	0.901226
0.800068	0.413744	0.740334
1.54034	0.424947	1.00682
1.55731	0.593768	0.728507
1.54929	0.741537	1.44473
1.67979	0.570237	0.862042
1.74878	0.412615	0.71886
1.93623	0.488618	1.11348
1.67747	0.501461	1.33496
1.34171		0.908332
1.116	0.475886	0.523131
0.775517	0.452114	0.543214
1.55008	0.574917	0.81366
1.14142	0.520511	1.23482
1.77708		0.458799
1.07491		1.19635
1.18397	0.708143	0.927922
1.51499		0.393642
1.39097	0.656468	1.01763
1.23278	0.53314	0.770107
1.69694	0.497007	0.918604
1.29504	0.500705	0.455408
0.847381	0.550533	0.608361
1.5544	0.404862
1.50833	0.566141	0.84365
2.59854	0.552949	0.482438
1.91877	0.636354	0.612442
1.7255	0.708718	0.497404
2.40214	0.503963	0.601997
1.1618	0.584412	0.982562
1.16714	0.630756	0.673773
1.18953	0.564072	1.2242
1.5318	0.646515	0.675816
2.87325	0.44344	1.12851
1.46185	0.637228	0.777088
1.00468	0.736277	0.398277
1.68056	0.61394	0.582277
0.948128	0.551343	0.588935
1.32578	0.427956	0.540819
0.794253	0.81811	0.407283
1.53514		1.20617
1.52781	0.429177	0.468969
1.5898	0.558117	0.610242
1.67083	0.379979	0.479106
1.05098	0.519474	0.894179
1.45332	0.400501	0.547423
1.01632	0.476048	0.945505
2.10707	0.46649	0.802192
1.28308	0.807657	0.616864
0.824825	0.781969	0.46677
	0.708405	0.851994
1.61361	0.5075	0.93069
0.976324	0.481029	0.721547
0.946353	0.771369	0.618189
1.68194	0.613835	0.417767
0.577803	0.41547	1.10956
0.786141	0.430883	1.03163
1.78298	0.472288	0.805099
1.79914	0.540388	0.72934
1.52316	0.473757	0.692707
1.53556	0.419436	1.27158
2.50083	0.407864	1.39955
1.09578	0.545632	0.696457
0.437341		1.57468
2.25671	0.601312	0.717708
0.732703	0.473293	0.706223
1.47599	0.472433	0.511414
0.78325	0.675976	0.889446
0.906986	0.454478	1.10131
2.29528	0.453467	0.880749
1.10972	0.495763	0.538342
0.723624	0.544248	0.792196
1.08463	0.42612	0.61613
0.43187	0.612568	0.821655
2.15803	0.43521	0.617994
1.02599	0.493406	0.627038
1.64458	0.404772	1.17802
1.7644	0.822688	0.512577
1.70081	0.498136	0.733527
1.75374		1.05388
1.37415	0.52092	0.614652
1.84262	0.844473	0.965381
1.18154	0.445561	1.59437
1.61836	0.430703	0.457581
1.36815	0.491146	0.666524
1.1367	0.531041	0.539338
0.535865	0.567241	0.959197
1.02137	0.43736	1.36011
1.80579	0.51161
	0.480668	0.561571
2.88967	0.509002	0.574307
1.77995	0.662434	0.836314
1.40335	0.609346	0.596297
2.68008	0.375974	0.736146
0.768546	0.532442	0.742822
1.39385	0.652293	0.65695
1.97467	0.656397	1.02058
0.966138		1.00886
1.82914	0.441699	1.5503
1.00126	0.475284	0.659042
2.91953	0.395539	0.547979
1.83778	0.651617	0.640597
2.91008	0.78675	0.634102
0.727244	0.773142	0.808764
2.66195	0.523173	0.940171
1.37463	0.395467	0.604616
1.63974	0.457693	1.70283
0.947472	0.455288	0.807013
2.30801	0.513697	0.87442
0.986103	0.54347	1.06215
1.30692	0.50183	0.565025
1.31963	0.510791	0.893212
1.58281	0.447868	0.655946
3.10604		0.760603
1.24843	0.753718	0.533398
0.877457	0.441016	0.565454
1.44809	0.552537	0.549577
1.68481	0.846836	0.658746
1.07488	0.480052	0.716714
1.74108	0.788939	0.689199
2.16725	0.531688	0.799224
1.9353	0.738497	0.751016
1.4031	0.607143	0.626828
1.89744	0.384123	0.806778
1.22857	0.504344	1.38995
2.05507	0.49953	0.796257
1.73054	0.581162	0.930781
1.03112	0.545656	0.868995
0.63706	0.439825	0.787162
1.60382	0.475417	1.2255
1.75542	0.416232	0.843236
1.23992	0.482437	0.846172
	0.427138	0.833789
0.983179	0.433256	1.20586
1.68859	0.465655	0.633102
1.81831	0.427818	0.596642
0.722303		1.48213
1.50558		0.897832
1.68914		0.874885
0.434069		1.45656
1.88272		0.805642
0.93355		0.611439
1.60791		0.675247
0.572157		1.12398
1.04673		0.816052
1.06354		0.531724
1.64012		0.649509
2.32463		0.513886
2.27498		0.583314
0.66471		0.73364
1.58457		1.00943
0.781961		1.02084
1.69797		0.873162
0.797831		0.643765
0.876689		1.02769
1.53399		0.667131
1.07994		0.744087
0.981037		0.817204
0.569301		1.3308
0.507937		0.934542
1.52575		0.833571
0.722263		0.606056
0.498548
0.956688		0.920338
1.56652		0.633279
0.680738		1.34369
0.920697		0.819215
0.758319		0.865582
0.984035		0.781453
1.21859		0.832243
1.22314		0.818598
1.5603		1.25164
0.84015		1.0057
2.06684		0.820031
0.622522		0.714072
1.19762		1.20366
0.466884		0.6312
0.512633		1.28618
0.88797		1.03437
1.38246		0.716862
1.18529		1.38256
1.00217		0.915417
0.448642		0.751373
0.762432		0.885104
0.794114		0.893553
2.41209		0.804359
1.52765
1.11932		0.69985
1.09669		0.683313
0.772844		1.72538
1.60034		1.2119
0.670958		0.791522
0.469215		0.717709
0.944922		0.807409
1.78077		0.824771
0.819423		0.68633
1.06742		0.769553
1.76204		0.488887
0.975813		0.727038
1.13807		1.04495
1.23473		0.517852
0.528136		0.718319
0.937601		0.691096
1.66371		0.755819
0.695961		1.18477
1.22063		1.11488
0.474278		1.0018
0.772217		0.960623
0.652657		0.821584
0.603809		0.676115
0.721955		0.883351
1.07024		0.735052
1.20358		0.65609
1.3661		0.88665
0.915774		0.463758
2.56019
0.496659		0.649211
1.13351		0.559852
1.15005		0.720324
1.26927		0.540257
1.09363		1.12123
1.4095		1.12362
1.00262		1.05771
1.05574		0.644489
1.41013		0.679863
1.46429		1.71949
1.82756		0.647002
0.924474		0.769192
0.606074		0.973023
0.944665		0.701172
0.630305		0.843863
0.612409		0.597313
1.62446		1.32943
0.664654
1.13442		1.2292
1.63215		0.731213
0.618614		1.16741
1.76282		0.892549
1.04669		0.52882
0.736274		1.06705
1.1885		0.420678
0.528273		0.792369
0.634418		1.08466
1.27121		1.02618
0.958246		0.809015
0.46805		0.744435
1.39388		1.07775
1.14424		0.651974
1.22149		1.54719
0.832989		0.991652
1.59886		0.605617
0.652327		1.38559
0.49619		0.461514
0.927575		1.51262
1.26149		0.67773
2.01058		0.422749
1.39403		1.03723
1.62053		0.925642
1.29351		0.860843
1.11121		1.18993
0.465295		0.444955
0.996617		0.630137
0.962214		0.871998
0.712845
0.824559		0.516945
0.957434		1.06864
1.06566		0.660544
1.06366		0.465891
1.71978		0.753566
0.668568		0.832727
0.9267		0.849599
1.87568		1.08096
1.74324		1.019
1.44787		0.411757
0.938225		0.485674
1.3905		0.916167
1.55937		0.84971
1.90707		0.801317
0.632107		0.993029
1.0349		1.06804
1.2981		0.548365
0.963728		1.72731
0.579491		0.699977
0.768509		1.30838
0.527479		1.37764
1.35269
0.800597		0.635164
1.03612		1.02281
1.3688		0.727256
0.907233		1.08166
1.41794		0.987051
0.807347		0.66708
1.40938		1.05274
1.33064		0.926492
0.894657		0.550681
1.80335		0.670578
0.824665		0.660674
1.62846		0.502491
1.46115		0.730588
1.19823		0.646584
0.928244		0.471526
1.76706		0.611457
1.37918		1.21182
1.17124		0.669933
0.735444		0.570528
1.20187		1.50607
0.612722		1.05109
1.19905		0.841084
1.95982
1.83183		1.08124
1.42882		1.0671
1.74925		0.733212
1.61038		1.43282
0.752589		0.798251
1.28052		0.433305
1.41353		1.35953
1.81		0.449915
0.396452		0.543874
0.620449		0.990389
1.48671		0.469775
1.31364		1.25539
1.13761		1.15724
1.32682		0.881091
1.90806		0.773293
0.988321		0.755817
1.75613		0.823643
1.96544		1.00165
1.86263		0.565546
1.87319		1.0958
1.25109		0.809693
0.583832		0.930496
2.03789		1.60499
1.41674
1.85273		0.789178
1.26914		0.931846
1.2012		1.0433
1.69853		1.22276
0.713076		0.978309
1.6409		0.805512
1.5889		0.387819
1.7989		0.863123
0.572113		0.541199
0.831021		1.4596
1.32476		1.16944
0.412939		0.706076
0.403918		0.5586
0.621571		0.970277
0.901522		0.912813
1.76857		0.438727
1.18343		0.609248
1.12462		0.503488
0.712758		0.936614
1.09313		0.688018
0.821538
1.95216		0.676812
0.41933		0.891374
1.42378		1.15458
1.30953		0.686982
0.536845		1.35785
1.69957		1.009
1.86274		0.519461
0.921252		0.655854
1.0612		0.832688
0.621395		1.12537
1.64639		0.548102
0.445859		1.04738
0.625189		1.48865
0.705376		0.88158
1.00416		0.97823
1.50578		0.76177
0.575079		1.04843
1.64241		0.572602
0.769148		0.543659
1.04445		0.477175
2.1566		0.517916
0.80683		0.461604
0.947462		0.791846
1.06044		1.23777
0.917617		0.823956
1.04761		0.56938
0.98649		0.862723
1.24272		0.7049
1.24965		1.3004
0.973852		0.810582
0.956777		0.465826
1.35252		0.712274
1.21866		0.732091
0.569664		0.635273
1.06968		0.693934
0.586984		0.704135
1.57052		0.902776
0.695895		0.765706
0.974267		1.18755
1.34088		0.739121
0.872443		1.47711
1.59913		0.563142
1.28169		0.792485
1.26185		0.568385
1.56407		1.02849
0.769697		0.514344
0.67883		1.49692
1.40314		0.490122
0.791074		0.702599
0.790255		0.763902
1.66291		0.612543
0.635806		0.605319
1.51228		1.08566
0.841202		0.861612
1.41496		0.632099
1.62057		0.527676
1.66618		0.714378
1.86837		0.770528
1.22673
0.639014		0.634064
0.611781		0.98609
0.648369		1.12908
0.581152		0.475354
1.28788		0.567486
1.59553		1.45099
1.44033		1.16083
0.729151		0.565341
0.560054		1.37731
1.29445
0.594011		0.82969
1.11244		1.17432
1.16256		1.04426
1.03014		0.774191
1.02281		0.686565
0.401183		0.914293
0.804687		0.620471
1.59814		0.710225
0.493332		0.807767
0.765977		0.774829
0.823697		0.643884
1.7149		0.427702
0.675326		1.04319
0.833718		1.0094
0.884617		0.371392
1.49184		0.910389
1.23022		0.491095
0.42968		0.714182
0.77916		0.641066
1.44984		0.677979
1.4556		0.891693
1.57524		0.756419
2.30284		0.716854
0.633124		0.561998
0.966083		1.01901
0.753279		1.46646
0.689883		0.978788
0.600475		0.559457
0.701295		1.0271
0.881524		1.36355
0.769148		0.681444
0.740076		0.940885
0.915735		0.459522
0.664584		1.15663
0.508869		1.02699
1.84742		0.904993
0.810739		1.03203
0.586796		0.837788
1.11395		0.928896
0.93071		0.660932
0.404362		0.915968
0.860191		0.555412
0.878438
0.549361		0.619202
1.40963		0.99748
0.599043		0.864728
0.835325		0.619261
0.567971		0.947542
1.11367		0.747042
1.69489		0.497462
0.788942		0.689977
0.599135		0.503254
0.72761		0.871139
1.52612		0.84958
0.773363		0.659264
0.645288		0.775147
0.97234		0.898758
0.54436		0.535738
0.660026		0.624908
0.845666		1.33035
1.80937		0.690486
1.09437		1.56281
0.753352		0.793707
0.642154		0.512263
0.729395		0.510768
0.616134		0.779292
1.30213		1.05383
0.912357		0.616271
2.23422		1.12916
0.954129		0.579038
0.800143		0.623224
1.47135		0.504616
1.89847		1.28993
0.721102		0.685665
1.22983		1.20037
0.749732		0.772151
1.16738		0.790178
1.19702		1.40988
0.611249		1.3693
0.943633		0.496883
0.720065		0.965122
1.18408		1.10612
1.02066		0.627784
1.58764		0.980666
1.95724		0.846782
1.42305		0.555647
0.76173		0.621322
2.05035		0.983426
0.440352		0.718188
0.974396		1.21642
1.22738		0.891825
1.21186		0.750326
0.830275		0.779958
1.33877		0.748807
1.109		1.56049
1.7654		1.05999
1.79314		1.11649
0.546308		1.43148
0.482043		1.10791
0.512666		0.522497
0.863303		0.660335
1.21078		1.05606
0.675361		1.21937
0.493368		0.802336
0.825696		1.03792
1.07846		0.879228
0.953553		0.880778
0.881448		0.80181
1.67653		0.366912
1.69016		0.946885
0.51894		1.53001
1.92348
1.1169		0.863369
0.721102		0.612752
1.60904		0.557212
1.14595		1.1657
0.680252		0.723985
0.59948		0.69854
0.538546		0.973906
0.971787		0.886108
1.77159		0.44848
0.625435		0.606279
0.658032		1.43462
1.40057		0.815461
1.13343		0.537663
1.81508		0.971907
1.42447		0.895175
0.93409		0.508544
0.948985		0.996698
0.826498		0.938088
1.14092		1.01644
1.61101		0.754836
1.3814		0.723906
1.26719		0.883296
0.727002		0.732833
1.75216		1.17181
0.901276
0.574384		0.666958
1.83375		1.21706
1.59254		0.788232
0.57535		1.21058
1.40014		0.560684
1.10422		0.898616
0.62773		0.718868
1.04181		0.608442
1.76312		1.35968
1.15651		0.860341
1.54896		1.65413
0.992207		0.697443
1.15791		1.33558
1.32023		0.781732
1.18702		0.955514
1.34457		0.66214
0.551036		0.704217
1.34714		0.699495
1.49655		0.910585
1.18721		0.572007
1.94848		0.801766
1.75625		1.06308
1.26355		0.634078
1.03204		1.22511
1.47394		1.55185
1.59401		0.910181
1.31689		1.0037
1.26914		0.609264
1.02836		1.08304
1.35617		0.736251
1.47652		0.48822
0.542955		0.666467
1.47984		0.936401
1.56569		1.09411
1.44464		0.69844
0.913379		0.830944
1.03634		0.842681
0.905157
1.54142		0.854703
1.14246		0.53773
1.04747		0.735111
1.45134		0.614688
1.41247		1.50497
1.24086		0.899445
1.66984
1.33562		0.869517
1.84877		0.401794
1.70733		0.506767
0.893328		0.790893
1.20464		0.427279
1.48186		0.517071
1.07771		0.813954
1.3325		0.77155
1.49814		0.613267
1.47905		0.538154
0.640672		0.62341
1.04578		1.14668
2.04983		0.845559
1.64187		0.560374
1.18649		1.33368
1.11917		0.978036
1.88745		0.602659
0.581425		1.24173
1.49436		0.758731
0.794043		0.803058
0.831717		0.665968
1.91553		1.18225
1.26043		1.62841
1.19047		1.60058
1.66299		0.837191
0.795401		0.67263
0.649201		0.592642
1.08807		1.09634
1.55733		0.5338
1.92748		0.483936
0.759849		1.03781
0.590372		0.739345
0.844708		1.11678
0.472968		1.23452
2.27963		0.743545
1.02275		0.567604
1.96926		0.980621
1.05438		0.735518
0.650093		0.941365
1.21583		0.630643
0.730181		0.582662
1.50671		0.727003
1.52164		0.873859
0.850778		1.05743
1.08935		0.647717
1.2106		0.623378
1.57918		1.07881
2.11483		1.39532
1.18369		0.805778
1.04958		0.620126
1.26188		1.00245
1.10956		0.547013
0.593969		1.19698
1.23963		0.4977
0.654862		0.634151
1.11365		1.33326
0.852937		0.513605
1.60249		0.824447
0.576132		0.465433
1.03235		0.746196
1.67805		0.752543
1.2633		0.480886
1.48788		0.808046
1.67815		0.384767
0.792775		1.57278
0.826531		0.977695
1.60941		0.481724
0.902734		0.587395
1.33302		1.22081
1.16258		0.90227
1.13491
1.46267		1.03543
1.19681		0.59821
0.851432		0.81574
1.26069		0.864437
1.38689		0.66616
1.5045		0.743374
0.636014		0.478986
1.72986		0.791045
1.56862		0.997424
1.73101		0.853439
1.04371		0.556902
0.687116		0.677922
0.701165		0.703821
0.873316		0.753159
1.753		0.450616
0.801453		0.560459
0.620012		0.997612
0.76909		0.684977
0.607556		1.14088
0.670615		1.23071
1.62817		0.561948
1.5327		1.16402
0.638887		0.796319
1.20082		0.636192
0.754863		0.731848
1.33649		0.77691
1.59532		0.847842
1.57443		0.663213
1.78766		0.522049
1.58799		0.927638
1.4978		0.823087
1.33795		0.421371
1.2612		1.11418
1.33488		0.536507
1.29462		0.539761
1.84024		0.735185
1.49194		1.25207
1.9596		1.01611
1.01741		0.722381
1.27212		1.06359
1.5755		0.68772
0.620553		0.534369
0.731459		0.854645
1.45276		1.38712
1.03936		0.825868
0.899709		0.608028
0.929092		0.998661
1.06509		0.687151
0.750561		0.812653
1.10859		1.14484
0.837233		1.12155
1.57758		0.907929
1.50415		0.661096
1.00525		1.00243
1.13359		0.516555
1.21048		0.873756
1.54133		0.746592
0.620052		0.903489
0.924649		1.01547
0.705311		0.677575
1.29362		0.8978
1.16909		0.719917
0.896099		0.658068
1.50458		0.70938
0.745539		0.769716
0.775838		0.562701
1.5891		1.20011
0.623453		0.541792
1.33425		0.744123
0.998747		0.466613
0.665993		1.72408
1.7672		0.453659
0.689176		0.643225
1.19761		0.685264
0.792999		0.73675
1.1229		0.909805
1.34046		0.657767
0.43954		0.799499
1.3329		0.963668
1.42496		0.517442
1.32794		1.01648
1.20252		0.770905
1.53294		0.782322
0.518276		0.734207
0.675462		1.07663
0.721742		0.709467
0.796725		1.17983
0.653438		0.720755
0.638113		1.61352
0.513266		0.570574
1.46264		0.98206
0.786568		0.924681
0.810894		0.876644
1.36652		0.964804
1.02836		0.662318
0.440836		0.602008
1.6456		0.866926
0.92962		0.661716
0.754194		0.929082
1.60968		0.778162
1.97162		0.730924
0.661006		0.922335
0.992304		0.86447
1.03023		0.567383
0.923753		0.638341
0.908838		0.43142
1.00744		0.730907
1.42526		0.66738
1.24335		1.11855
1.38518		0.484909
1.11934		0.490718
1.20082		0.969071
1.94058		0.798999
1.41658		1.30323
1.54189		1.47322
1.23989		0.921568
1.34027		0.883266
1.72576		0.659733
1.40347		0.678761
1.36062		0.56397
1.57035		1.1876
1.13182		0.654415
0.68809		0.768428
0.671669		1.02155
0.831139		0.43069
0.688402		0.484085
1.90205		0.660545
1.35794		0.466124
3.001		0.668743
1.07557		0.633808
1.17453		0.874977
0.955578		1.06201
2.53956		0.743247
1.29593		0.855391
0.890933		0.971601
1.26129		0.835317
1.7867		0.694808
1.11032		0.679551
1.43697		0.585514
1.2005		0.461599
1.00686		0.585286
1.59331		0.460578
1.57244		0.462102
1.58301		1.25128
1.37723		0.845888
0.902392		1.22982
0.596102		1.03778
0.434555		0.747688
0.909633		0.671806
0.840732		0.507636
1.45104		0.77022
1.07447		0.476353
0.63302		0.486443
1.72194		0.476733
1.15561		1.10912
0.851013		1.7016
0.909214		0.613009
1.1218		1.05246
0.532949		1.5074
1.15599		1.12149
1.6143		0.597852
0.479876		1.06508
0.530908		0.738168
0.810719		0.58915
1.01918		0.682618
0.567018		0.765973
0.57313
1.52989
0.690155		0.837507
0.560336
1.47129		1.20232
0.792861		0.73086
0.504972		0.938109
1.66711		1.03256
0.527838		0.746242
0.463694		0.523915
0.695781		1.28072
1.17379		1.02357
0.57847		0.512329
0.428001		0.600757
0.777606		0.894003
0.834061		0.650856
0.689296		1.05007
1.12131		0.799931
0.809809		1.1888
1.39117		0.689197
0.663548		0.752825
1.51507		1.18918
1.11327		1.11224
0.978418		0.700583
1.21792		0.818125
1.56339		1.54048
0.660837		0.529743
1.01967		0.471498
0.575152		0.698447
1.65555		0.717384
1.0319		1.28271
1.38562		0.572891
0.960889		0.700922
0.460459		0.576971
0.67746		0.641238
2.06798		0.587682
0.776958		0.838021
0.917024		0.564213
2.34159		0.820423
0.883516		0.706137
1.12988		0.687245
1.02228		0.633895
0.803573		0.517817
1.15609		0.524511
0.752153		0.583678
1.57293		0.651007
1.6616		0.42274
1.92154		1.03074
1.2721		0.752972
1.53598		0.507885
1.38255		0.409248
0.961662		0.581702
0.586004		0.927162
0.921859		1.1375
1.27771		1.35792
1.72955		0.683399
1.72526		1.25868
1.82391		0.652146
0.498862		0.687022
1.78168		0.561783
1.28653		0.94973
0.896947		0.602621
1.47588		0.479705
0.760189		0.520642
0.936423		0.73163
1.06018		0.442324
1.38703		0.777418
1.36595		0.617806
1.05044		0.75635
1.06326		1.23444
1.31327		0.760585
1.60815		0.817761
1.61099		0.751594
1.41427		0.391086
0.760235		0.949972
0.614489		0.692626
1.15321		0.663963
1.08446		0.832511
1.04729		1.11643
0.914111		0.934149
		0.553896
1.52606		0.637146
1.65231		0.987618
1.52414		1.06059
1.2659		0.525315
1.31115		0.467192
1.64186		0.729976
0.586676		0.804385
1.71276		0.46164
1.71096		0.48664
1.71168		0.936288
1.87297		1.09138
1.96242		0.588305
2.04714		0.808822
0.630642		0.724669
1.95051		0.783234
0.436147		0.696972
1.66241		0.544477
0.883646		1.16455
1.38779		0.863008
1.34266		0.853565
0.902921		1.2131
0.714093		0.49346
1.64754		1.18573
0.732743		0.457245
1.30466		0.751751
1.31755		0.410885
1.41899		1.54747
1.14534		0.798826
0.945399		0.66012
1.07403		0.614141
0.771108		1.06337
1.8774		0.690338
0.833685		0.646479
0.733778		1.02811
0.950428		0.948211
2.46861		0.72476
1.25995		1.27464
1.77015		0.459585
1.42733		0.772225
0.548536		1.0281
1.43028		0.423135
0.806651		0.584531
0.753943		0.467293
1.29235		0.545319
1.79737		1.64676
0.747484		0.961573
0.794154		1.1811
1.19009		1.12838
1.0874		0.567228
1.37016		0.845379
1.48039		0.642905
0.696216		0.505597
1.18074		0.959233
1.65133		0.648988
1.74184		0.647239
1.09431		0.444927
1.61444		0.6617
1.15072		1.38835
1.49544		0.888697
1.02687		0.529017
1.45924		1.06069
1.14891		0.694647
0.856939		1.05222
0.922311		0.635317
0.692544		0.552972
0.670152		0.581672
1.65725		0.937151
1.7668		0.953313
0.931946		0.708485
1.36494		1.04591
0.82865		0.725761
1.59257		0.893499
1.34842		0.787465
1.55818		1.45489
0.935494
0.984878		0.584969
1.44703		0.651703
1.09226
0.538341		0.930725
2.08081		0.700685
1.79875		0.440738
1.95073		0.564464
0.953169		0.837166
1.72253		0.787761
0.756997
1.61133		0.508492
1.41638		0.498875
0.814232		0.876452
0.916943		0.704853
0.652971		0.879716
1.06106		0.659321
0.710311		0.471449
0.751372		1.46006
1.52499		0.687849
0.86592		0.773709
1.86058		0.78768
1.94865		0.596662
0.56105		0.811322
0.893452		0.905154
1.99116		0.951631
1.68153		0.913634
1.72799		0.763015
0.618151		0.907935
1.65987		1.03548
2.06564		1.54032
0.89195		0.830854
1.90207		0.635088
1.06278		0.850672
2.08959		0.820133
1.6866		0.829547
1.13097		0.605629
		0.571739
		0.551968
		0.396904
		0.776827
		0.460597
		0.776073
		0.662608
		1.01314
		0.632697
		0.49885
		0.484656
		0.913472
		0.505141
		0.868939
		0.605215
		1.01032
		0.796545
		0.718353
		1.04979
		0.809128
		1.14213
		0.731281
		1.14291
		0.783856
		0.571955
		0.751151
		0.8435
		0.571019
		0.754294
		0.626644
		0.725801
		1.03488
		0.949949
		0.523431
		0.860935
		0.496103
		0.634389
		0.779665
		0.826373
		0.688959
		0.776624
		0.771973
		0.814303
		1.10699
		1.15321
		0.960973
		0.712882
		1.09993
		0.661107
		0.447345
		1.01052
		0.801779
		0.757452
		0.865663
		1.46024
		0.610876
		0.684202
		0.517254
		0.64241
		0.53268
		0.738089
		1.42628
		0.588036
		1.00007
		0.502429
		0.548404
		0.7725
		0.920173
		0.632789
		0.545404
		1.26277
		1.06753
		0.915135
		0.55324
		0.518664
		0.703899
		0.454391
		0.901745
		0.582012
		0.948462
		0.826359
		0.757353
		0.832703
		1.00986
		0.685534
		0.623067
		0.963276

## Sheet: frequency distribution
Bin Center	P42 WT	P42 KO	P42 KI
0	0	0	0
0.1	0	0	0
0.2	0	0	0
0.3	0	0	1
0.4	18	58	42
0.5	45	138	151
0.6	89	83	189
0.7	87	35	227
0.8	109	25	198
0.9	93	9	149
1	91	0	117
1.1	85	0	88
1.2	97	0	56
1.3	87	0	32
1.4	83	0	26
1.5	86	0	25
1.6	85	0	13
1.7	66	0	8
1.8	53	0	0
1.9	29	0	0
2	20	0	0
2.1	11	0	0
2.2	5	0	0
2.3	8	0	0
2.4	3	0	0
2.5	3	0	0
2.6	2	0	0
2.7	3	0	0
2.8	0	0	0
2.9	4	0	0
3	1	0	0
3.1	1	0	0
3.2	0	0	0

## Sheet: cumulative histogram
Bin Center	P42 WT	P42 KO	P42 KI
0	0	0	0
0.1	0	0	0
0.2	0	0	0
0.3	0	0	0.075643
0.4	1.42405	16.6667	3.25265
0.5	4.98418	56.3218	14.6747
0.6	12.0253	80.1724	28.9713
0.7	18.9082	90.2299	46.1422
0.8	27.5316	97.4138	61.1195
0.9	34.8892	100	72.3903
1	42.0886	100	81.2405
1.1	48.8133	100	87.8971
1.2	56.4873	100	92.1331
1.3	63.3703	100	94.5537
1.4	69.9367	100	96.5204
1.5	76.7405	100	98.4115
1.6	83.4652	100	99.3949
1.7	88.6867	100	100
1.8	92.8797	100	100
1.9	95.1741	100	100
2	96.7563	100	100
2.1	97.6266	100	100
2.2	98.0222	100	100
2.3	98.6551	100	100
2.4	98.8924	100	100
2.5	99.1297	100	100
2.6	99.288	100	100
2.7	99.5253	100	100
2.8	99.5253	100	100
2.9	99.8418	100	100
3	99.9209	100	100
