# Supplementary material for: A dual role for Cav1.4 Ca2+ channels in the molecular and structural organization of the rod photoreceptor synapse
Source: eLife journal article supplement (doi:10.7554/elife.62184), 2020-09-17
Supplement: fig2-data1 [file rod ribbon sphericity.xlsx]

## Sheet: rod ribbon sphericity
P42 WT	P42 KI	P42 KO
0.100083	0.307053	0.250702
0	0.219629	0.460403
0	0.168718	0.265592
0.179353	0.449597	0.229699
0.0437728	0.458899	0
0.0275415	0.0804892	0
0.28689	0.702299	0.4
0.112664	0.448484	0
0.275247	0.21243	0.315213
0.309951	0.0963879	0.144616
0.0143137	0.351043	0.419824
0.0703222	0.222522	0.63544
0.0680203	0.551484	0.127813
0.0817053	0.0899085	0.355771
0.236873	0.0318703	0.625
0.353433	0.450224	0.33464
0.137561	0.625	0.375277
0.0681261	0.379233	0.173251
0.159236	0.383388	0.163756
0.0404561	0.600734	0.295731
0	0.619354	0.201298
0.157189	0.0467263	0.246534
0.188002	0.454085	0.174875
0.5	0.464643	0.407159
0.419375	0.237867	0.436575
0.0260343	0.124391	0.49678
0.0783926	0.18978	0.330231
0.270536	0.136753	0.360602
0.4	0.369775	0.26697
0.151159	0	0.439005
0.196414	0.629566	0.231039
0.0507842	0.114464	0.481216
0.0977264	0.155772	0.304658
0.108238	0.526827	0.24874
0.100301	0.521525	0.356932
0.0898764	0.354856	0.362165
0.084416	0.496907	0.279026
0.0504132	0.590176	0.5288
0.0956157	0.534866	0.47076
0.0629438	0.239601	0.520424
0.160085	0.0986847	0.307976
0.26896	0.199312	0.294249
0.0822199	0.11279	0.239601
0.142303	0.102005	0.218297
0.134219	0.499226	0.625
0.0712002	0.785714	0.112057
0.0667678	0.41454	0.271071
0.136203	0.449505	0.538186
0.22328	0.572215	0.232233
0.278088	0.625	0.137714
0.112536	0	0.148654
0.0498721	0.671334	0.369062
0.214242	0.142488	0
0	0.510019	0.79627
0.242245	0.266634	0.294204
0.0924444	0.164814	0.647321
0.110864	0.485703	0.440857
0.052942	0.245617	0.638301
0.0775322	0.490929	0.359079
0.266093	0.149913	0.189226
0.199327	0.415563	0.107649
0.389051	0.354216	0.321175
0.224777	0.406028	0.459198
0.249253	0.278603	0.21824
0.190415	0.0621015	0.410485
0.0862407	0.232552	0.356168
0.351949	0.047168	0.369683
0.0474419	0.594052	0.313153
0.511119	0.33545	0.18034
0.386651	0.491959	0.225625
0.106836	0.544379	0.540871
0.025317	0	0.448619
0	0.0998419	0.349636
0.163432	0.569769	0.419375
0.485208	0.224451	0.430208
0.0386919	0.461451	0.310996
0.202519	0.303925	0.446429
0.106169	0.0635977	0.444634
0.0890868	0.303705	0.440183
0.168614	0.384797	0.5
0.042788	0.305854	0.198866
0.0833333	0.303301	0.597154
0.162274	0.285878	0
0.0486323	0.226548	0.4
0.41166	0.399625	0
0.202888	0.175495	0.245914
0.131294	0.382508	0.309309
0.077563	0.0762965	0.474564
0.106139	0.101176	0.271018
0.312212	0.173859	0.384932
0.0354338	0.490016	0.149749
0.0640785	0.236571	0.264443
0.0432256	0.19285	0.308538
0	0.468031	0
0.206519	0.34991	0.419375
0.092703	0.584293	0.236248
0.073231	0.178653	0.232233
0.315833	0.232548	0.315483
0.271912	0.479062	0.183553
0.243937	0.226468	0.484627
0.0319941	0.0299304	0.2933
0.0754705	0.54751	0.25973
0.022947	0.435847	0.156174
0.0106991	0.44029	0.625
0.264943	0.275239	0.194468
0.0651919	0.493097	0.290793
0.196154	0.127747	0.27168
0.0455309	0.508257	0.324384
0.500039	0.34516	0.32045
0.0550899	0.0930157	0.344888
0.0901272	0.0929122	0.160951
0.0614128	0.244276	0.445174
0.0714594	0.296914	0.371846
0.0277991	0.217526	0.342929
0.0414933	0.0958004	0.371085
0.26312	0.56377	0.245882
0.114436	0.111816	0.279071
0.171484	0	0.298113
0.0661845	0.195165	0.157849
0.0766972	0.0718123	0.351845
0.272509	0.567969	0.498887
0	0.481526	0.419375
0.223015	0.526803	0.256902
0.575238	0.4	0.239601
0.0527443	0.381964	0.430877
0.0905397	0.470126	0.492345
0.154912	0.436993	0.39523
0.0231726	0.229444	0.194858
0.0305522	0.0405616	0.340101
0.0531235	0.361111	0.16748
0.232233	0.271169	0.487373
0.0324172	0.484041	0.626102
0.0464432	0.577013	0.207503
0.0326791	0.453079	0.429543
0.0584436	0.178228	0.222677
0.0958504	0.350308	0.224194
0.198866	0.541667	0.564577
0.0212945	0.168154	0.519696
0.0764422	0.373583	0.0447133
0.0822681	0.114105	0.271502
0.253024	0.252121	0.0581568
0.301245	0.272727	0.188451
0	0.43638	0.344603
0.482823	0.606181	0.156329
0.0496154	0.443809	0.431088
0.135816	0.15512	0.476365
0.419375	0.412105	0.576239
0.131734	0.315252	0.34434
0.039475	0.219776	0.623994
0.398864	0.475692	0.416004
0	0.274139	0.546923
0.232233	0.4765	0.505902
0.0518381	0.535342	0.278378
0.063824	0.353057	0.477092
0.0630645	0.357922	0.276427
0.205313	0.144131	0.453973
0.333231	0.14198	0.544745
0.131387	0.470713	0.470295
0.481764	0.279755	0.441813
0	0.0748506	0.417433
0.0905054	0.335674	0.567333
0.0559515	0.0882039	0.659167
0.0410075	0.0809594	0
0.131519	0.124459	0.167173
0.529835	0.340877	0.327996
0.06004	0.40109	0
0.0924134	0.117071	0.4
0.133367	0.0255364	0.22472
0.0422811	0.060775	0.232233
0.22983	0.405236	0.588162
0.0667477	0.542406	0.186913
0.198484	0.407209	0.466294
0.0372882	0	0.239442
0.27031	0.120622	0.205324
0.139612	0	0.344044
0.177063	0	0.166483
0.205636	0.237016	0.287184
0.0409868	0.384226	0.239601
0.307698	0.0286476	0.0864078
0.0251634	0.475711	0
0.14077	0.394289	0.0770653
0.0895457	0.475283	0.0797897
0.0620919	0.0801049	0.323909
0.0406281	0.515768	0.349092
0.492705	0.0455542	0.583333
0.379896	0.164489	0.523332
0.129277	0.129882	0.355864
0.168	0	0.51074
0.108134	0.540076	0.237312
0.1166	0.303128	0.328452
0.461451	0.256393	0.1875
0.0639907	0.342882	0.306192
0.0217679	0.394404	0.163853
0.0448609	0.494386	0.558916
0.042424	0.0921584	0.566341
0.0652309	0.232233	0.231876
0.441024	0.351232	0.119668
0.227752	0.356867	0.33611
0.125704	0.511378	0.450676
0.0537488	0.247771	0.239476
0.128516	0.132036	0.1334
0.192019	0.443224	0
0.146774	0.637191	0.548645
0.050017	0.440473	0.446429
0.368856	0.290078	0.434569
0.452003	0.497102	0.239601
0.199723	0.188425	0.632705
0.164243	0.406296	0.166667
0.0686758	0.518876	0
0.0442673	0.323491	0.503172
0.253337	0.189464	0.225297
0.352217	0.407378	0.385876
0.116396	0.147312	0.0978067
0.042844	0.501842	0.300158
0.0336733	0.488442	0.346134
0.0658594	0.195341	0.521121
0.208133	0.522961	0.474359
0.465697	0.539992	0.490563
0.126099	0.08174	0.125809
0.0685808	0.079824	0.317919
0	0.299926	0.321295
0.118335	0.291192	0.272032
0.24029	0.29699	0.264728
0.109241	0.632792	0.306001
0.36388	0.199426	0.435195
0.487171	0.358536	0.368292
0.0295242	0.288025	0.625
0	0.280771	0.224656
0.0740248	0.236526	0.55386
0.213435	0.203939	0
0	0.182438	0.46273
0.375703	0	0.229743
0.0305132	0.324159	0.274426
0.0903238	0.541667	0.306446
0.119844	0.119785	0.371441
0.235446	0.216876	0.440939
0.0566735	0.165548	0.325767
0	0.515858	0.43239
0.0771817	0.247072	0.554496
0.0508756	0.571947	0.456126
0.0348501	0.16095	0.397178
0	0.349785	0.0715969
0.265355	0.446061	0.199676
0.647532	0.421911	0.325762
0.0761581	0.211329	0.506766
0.461451	0.56889	0.476707
0.117131	0.24258	0.220185
0.126918	0.361111	0.101055
0.239527	0.402817	0.0441025
0.0993167	0.308852	0.217845
0.123694	0.169883	0.12252
0	0.246016	0.453419
0.100966	0.283903	0.289504
0.0295783	0.410447	0.447127
0.090602	0.0659991	0.416172
0.130273	0.235622	0.198634
0.0733828	0.438335	0.249088
0.0260355	0.150966	0.235832
0.26946	0.26533	0.0770761
0.19162	0.17608	0.490222
0.159133	0.378874	0.405814
0.132646	0.256848	0.298653
0.1875	0.311233	0
0.230151	0.111338	0
0.0958444	0.0894175	0.475617
0.0998535	0	0.373582
0.097505	0.342539	0.287259
0.0219818	0.538462	0.359761
0.113826	0.445664	0.554469
0.296526	0.561408	0.172164
0.131931	0.128621	0.466493
0.137296	0.33145	0.402469
0.103589	0.458455	0.419375
0.27181	0.423443	0
0	0.515785	0.369069
0.0833333	0	0.439766
0.146166	0.399374	0.390265
0.513091	0.342076	0.270574
0.13776	0.442675	0.476602
0.325934	0.287457	0.544463
0.267931	0.45476	0.455227
0.12552	0	0.251989
0.0666658	0	0.59375
0.0381408	0.137738	0.342966
0.103452	0.378238	0.541911
0.140411	0.395599	0.374286
0.0751252	0.220395	0.318887
0.213606	0.0806369	0.567867
0.24438	0.54571	0.541667
0.0637595	0.298516	0.388121
0.200901	0.253919	0.184827
0.152085	0	0.166773
0.154382	0.068937	0.236156
0	0.481258	0.284194
0.209756	0.43821	0.247687
0.0440957	0.26222	0.288368
0.211733	0.0426815	0.155772
0.163313	0.0625139	0.647731
0.124985	0.258933	0.454149
0.162321	0.119285	0.529408
0.218344	0.13306	0.404981
0.23629	0.0978346	0.387758
0.114814	0.212884	0.239443
0.0360646	0.0735775	0.321293
0.0670913	0.424206	0.343799
0.0663544	0.446393	0.531848
0.0555094	0.327544	0.1875
0.153939	0.168492	0.232443
0.154278	0.0870614	0.360846
0	0.119693	0.290441
0.160724	0.191831	0.0456769
0	0.217885	0.115304
0	0.224486	0.434562
0.429099	0.339504	0.500149
0.16618	0.0943495	0.21087
0	0.382859	0.369813
0.0340926	0.46819	0.152166
0.047606	0.358695	0.4
0.251434	0.0981679	0.482803
0.0775362	0.608118	0.17792
0.357143	0.353603	0.506542
0.281465	0.104099	0.483739
0.625	0.369231	0.527276
0.0947163	0.531627	0
0.075244	0.294368	0.163496
0.0419023	0.20363	0.0855318
0.129854	0.206192	0.625
0.0922118	0.198413	0.318301
0.330528	0.240058	0.231106
0.141754	0.0653079	0.46543
0.55658	0.160583	0.396257
0.0788514	0.0712361	0.377693
0.171178	0.159248	0.618875
0.389861	0.0741829	0.288648
0.0674433	0.216855	0.5027
0.0308415	0.350445	0.303471
0.0540316	0.295621	0.574124
0.227765	0.180224	0.383568
0.1574	0.313783	0.180503
0.473423	0.238249	0.393063
0.239673	0.0513484	0.181265
0.274624	0.0694564	0.103791
0	0.173276	0.317691
0	0.232544	0.277684
0.341599	0.077384	0.248698
0.240099	0.101191	0.65
0.0528452	0.199353	0.232233
0.0632437	0.361346	0.284013
0.146847	0.192799	0
0.207659	0.546642	0.383581
0.126785	0.167538	0.371337
0.106141	0.105268	0.251879
0.169126	0.257612	0.0825352
0.169329	0.361111	0.394074
0.166778	0.0590913	0.419375
0.189455	0.255793	0.625
0.410565	0.373025	0.312545
0.0657819	0.454013	0
0.19059	0.282694	0.206984
0.0269925	0.419375	0.148456
0.0670116	0.136051	0.290056
0.137595	0.213577	0.421269
0.411643	0.482745	0.215611
0.207668	0.206028	0.411658
0.0688503	0.381916	0.393336
0.0667298	0.177845	0.237318
0.135294	0.104956	0.28173
0.290995	0.419375	0.168456
0.18021	0.0752874	0.301487
0.123804	0.373025	0.344463
0.396467	0.454915	0.344924
0.11046	0.164148	0.452421
0.286629	0.478067	0.453623
0.540586	0.145298	0.286266
0	0.540872	0
0.130325	0.278328	0.158686
0.0453366	0.31681	0.393989
0.10584	0.166667	0.458641
0.419375	0.232233	0.40251
0.0870723	0.195229	0.322297
0.0816439	0.347326	0.270849
0.0348313	0.316479	0.0496904
0.0175525	0.211894	0.304754
0.0710905	0.20103	0.310358
0.0917319	0.353688	0.105777
0.0878228	0.495713	0.239583
0	0.0632748	0.384661
0.082524	0.309423	0.394951
0.239601	0.324581	0.585131
0.100844	0.356984	0.52206
0	0.328905	0.333176
0.0732325	0.46684	0.414922
0.154623	0.0289936	0.319211
0.0518966	0.320313	0.449751
0.0539103	0.449431	0.09155
0.0241995	0.269297	0.541667
0.0604198	0.433086	0.170533
0.0204004	0.35453	0.125302
0.0439498	0.232323	0.669058
0	0.147197	0.144365
0.200645	0.286937	0.363511
0.100206	0.287788	0.449128
0.107159	0	0.232233
0.0904142	0.261781	0.485265
0.078454	0.398644	0.398571
0.366389	0.183915	0.4
0.136138	0.286466	0.336016
0	0.228572	0.5
0.109139	0.232233	0.4
0.262422	0.072949	0.380783
0.137591	0.150167	0.428849
0.166688	0.0554825	0.232233
0.321429	0.10562	0.286747
0.0412826	0.144915	0.247895
0	0.126565	0.551339
0.0613213	0.121439	0.171677
0.523549	0.461334	0.128493
0.4375	0.257996	0.322632
0.165456	0.0375771	0.250051
0.0529377	0	0.193034
0.0634773	0.101751	0.191481
0.0968825	0.167161	0.404821
0	0.45203	0.433333
0.0898136	0.137358	0.361369
0.232233	0.113337	0.169886
0.0634296	0.255996	0.155068
0.1856	0.416377	0.343475
0.0758825	0.289317	0.40198
0.5	0.175066	0.274113
0.274327	0.165843	0.32053
0.299432	0.316124	0.248521
0	0.144365	0.13195
0.0512095	0.0454703	0.207659
0.199337	0.348878	0.516858
0.785714	0.157258	0
0.0692443	0.210817	0.273218
0.163949	0.018497	0.474012
0.354167	0.263718	0.389056
0.526414	0.30462	0.19165
0.229167	0.19822	0.357627
0.0354544	0.241581	0.0951576
0.215044	0.0970264	0.343742
0	0.0444141	0.318507
0.303506	0.0625755	0
0.103017	0.218234	0.370495
0	0.295589	0.179983
0.162513	0.218176	0.464648
0.256431	0.186286	0.396497
0.170195	0.20158	0.379918
0.0916149	0.129683	0.212133
0.07707	0.13777	0.365447
0.273923	0.370731	0.240351
0.369815	0.282777	0.406212
0.0763447	0.15059	0.399194
0.232233	0.230554	0.35314
0.421112	0.219327	0.0656867
0.0808252	0.399413	0.164702
0.102751	0.645126	0.295265
0.381447	0.207659	0.410809
0.0425266	0.572929	0.394583
0.0312091	0.377255	0.4
0.4	0.619368	0.502828
0.357604	0.390437	0.125878
0.550687	0.354384	0.414384
0.178617	0.0567778	0.163397
0.232233	0.0910553	0.46133
0.102405	0.150586	0.301721
0.411353	0.490869	0.363249
0.0631089	0.127773	0.293554
0.207268	0.394646	0.378209
0.5	0.0792889	0.35796
0.0424472	0.181997	0.317576
0.105578	0.461451	0.297998
0.153078	0.182838	0.441153
0	0.289269	0.541092
0.0783496	0.192475	0.365878
0.0312501	0.173575	0.285523
0.0904807	0.187566	0.5
0.186581	0.345807	0.625
0.290406	0.112323	0.38761
0.232233	0.179285	0.250689
0.0475709	0.418697	0.353603
0.18745	0.274168	0.49228
0.4	0.301245	0.232233
0.183915	0.14054	0.322942
0.19435	0.385124	0.225586
0.173102	0.0664605	0.294006
0.075096	0.282755	0
0.130715	0.137267	0.241246
0.144879	0.0248044	0.296493
0.0761201	0.437418	0.357259
0.194236	0.102081	0.603367
0.270083	0.300383	0.490472
0.0469273	0.452113	0
0.339331	0.130422	0.424829
0.351887	0.319099	0.367903
0.248152	0.102928	0.474171
0.343273	0.276771	0.456789
0.0400824	0.29516	0.262349
0.0834138	0.164641	0.465431
0	0.118918	0.329326
0.205571	0.443748	0.365092
0.299612	0.243233	0.488738
0.132135	0.369475	0.398782
0.345121	0.314125	0.4
0.581944	0.203159	0.513796
0.50395	0.183602	0.247321
0.389338	0.324189	0.330862
0.19456	0.137099	0.141022
0.0848242	0.207676	0.283135
0.244988	0.224314	0.376029
0.204607	0.151496	0.484454
0.0946258	0.358153	0.144087
0.155726	0.454276	0.30958
0.11223	0.625	0.304946
0.1304	0.172897	0.225499
0.625	0.442708	0.199744
0.0592379	0.1875	0.173726
0.342761	0.460149	0.655747
0.264739	0.456945	0.438845
0.398071	0.395833	0.302294
0.21658	0.179417	0.44076
0.399029	0.171009	0.212452
0.453511	0.488872	0.546642
0.160209	0.470231	0.670001
0.0804339	0.331005	0.427497
0	0.0533966	0.138938
0.0835757	0.433301	0.493863
0.399542	0.444002	0.384732
0.0800457	0.476518	0.361111
0.446404	0.354571	0.421136
0.329054	0.36947	0.294169
0.036417	0.270478	0.574556
0.0855146	0.268575	0.371925
0.0882821	0.0966382	0.111452
0.049571	0.583333	0.198866
0.0740807	0.0934716	0.314815
0.143985	0.489237	0.385484
0.0605437	0.166771	0.425466
0.0323999	0.0698653	0.473629
0.361898	0	0.152396
0.444631	0.207215	0.355123
0.261949	0.222064	0.295826
0.105741	0.654071	0.454772
0.271199	0.273555	0.58825
0.232233	0.119115	0.244275
0.0549304	0	0.315012
0.286601	0.109177	0.321121
0.164325	0.271923	0.362165
0.12195	0.335545	0.3831
0.232385	0.488398	0.604954
0.288371	0.410546	0.480509
0.0646402	0.324154	0.601251
0.107608	0.53627	0.308665
0.0641013	0.460107	0
0.0656401	0.259229	0.584143
0.505778	0.583333	0.354757
0	0.365951	0.301419
0	0.331214	0.452418
0.0404561	0.071575	0.379407
0.346351	0.419375	0.277897
0.124326	0.279095	0
0.127642	0.532512	0
0.0839584	0.528084	0.479068
0.123753	0.10918	0.442093
0.130509	0.177431	0.398469
0.258009	0.50882	0
0.0467413	0.406797	0.1505
0.424064	0.396476	0.392857
0	0.266847	0.43614
0	0.118479	0.385703
0.194946	0.227715	0.381768
0.272128	0.32578	0.4
0.221446	0.0365232	0.356753
0	0.179773	0.252988
0.130488	0.233675	0.415082
0.111315	0.323608	0.207201
0.497247	0.133132	0.445548
0.486799	0.367711	0.43628
0.4125	0.541667	0.207659
0	0.277201	0.559446
0	0.528053	0.521901
0.413376	0.389078	0.219533
0.519145	0.338497	0.49101
0	0.124715	0.529217
0.329478	0.170744	0.454373
0.283303	0.689447	0.36758
0.192639	0.38611	0.442229
0.284572	0.101814	0.536577
0.410188	0.321256	0.362165
0.361111	0.546875	0.477797
0.123772	0.393347	0.20267
0	0.291934	0.427587
0.363209	0	0.38761
0.295953	0.245106	0.335425
0.4	0.479095	0.376344
0.232233	0.513415	0.366425
0.454071	0.365621	0.363842
0	0.193412	0.361914
0.329177	0.1875	0.322804
0.240962	0.211692	0.416325
0.333869	0.257139	0.267659
0.408706	0.270566	0.216783
0.0775328	0.475966	0.51976
0.135746	0.314841	0.292664
0	0.201055	0.136095
0.34009	0.311501	0.319048
0.244294	0	0.415162
0.150724	0.0568265	0.323051
0.0997832	0.32392	0.492127
0.297312	0.0208649	0.28285
0.169603	0.40736	0.1875
0	0.389037	0.269559
0	0.433772	0.322451
0.392857	0.183004	0.668537
0.3125	0.5089	0
0.310765	0.267493	0.492872
0.625	0.148677	0.363877
0.625	0.0691655	0.272697
0.0993766	0.037308	0.489519
0.311139	0.548241	0.465783
0.486214	0.0348451	0.49058
0.200001	0.491453	0.218432
0.0441852	0.0551316	0.471429
0	0.301245	0.12374
0.234566	0.404871	0.424854
0.583983	0.252774	0
0	0.146761	0.528846
0.0582012	0.159107	0.335677
0.224328	0.132812	0.415655
0.214265	0.19661	0.518755
0.0361416	0.18889	0.292881
0.207659	0.199959	0.268324
0.334172	0.135459	0.321429
0.383155	0.116587	0.27603
0.117744	0.171661	0.320818
0.536509	0.232233	0.351852
0.264827	0.0977199	0.366124
0.141907	0.133854	0.537993
0.0966334	0.572978	0.435333
0.342109	0.0566574	0.198866
0.114717	0.512426	0.420215
0.447177	0.500617	0.313838
0.14007	0.610007	0.278474
0.169043	0.274638	0.200001
0.219239	0.0929713	0.211329
0.126394	0.199537	0.330981
0	0.435106	0.378559
0.245818	0.218369	0.334177
0	0.210227	0.274338
0.279583	0.263309	0.278932
0.0753803	0.120204	0.0837705
0.0536283	0.195077	0.222285
0.0833333	0.40387	0.315012
0.0582271	0.0861275	0.669366
0.207659	0.49678	0.614293
0.413035	0.220912	0.332952
0.239601	0.195389	0.413679
0.115347	0.345222	0.423359
0	0.109459	0.301245
0.17701	0.0570236	0.42916
0.315478	0.540585	0.166667
0.625	0.474001	0.375574
0.0932795	0.477778	0.398815
0.145526	0.237925	0.495451
0.0252049	0.560219	0.400343
0.189925	0.345849	0.306699
0.078337	0.53706	0.286647
0.0954947	0.324063	0
0	0.0861602	0.5
0.365972	0.161956	0.371961
0.0296433	0.205032	0.291871
0.0989016	0.199394	0.495738
0.0846383	0.262019	0.305493
0.166258	0.241728	0.346843
0.101736	0.106058	0.370321
0.111672	0.118204	0.242062
0.5	0.333632	0.427016
0.195811	0.176386	0.625
0.0802647	0.202769	0.51738
0.0498408	0.379045	0.492061
0.325026	0.205433	0
0.0725695	0.305897	0.368623
0.0583333	0.455596	0.327445
0.239601	0.396257	0.298849
0.0641763	0.188871	0.541667
0.0721014	0.0337104	0.397133
0.174537	0.45764	0.366807
0.06645	0.285359	0.369379
0	0.309845	0.491111
0.0931881	0.191475	0.418324
0.102245	0.069582	0.244175
0.198689	0.151258	0.136545
0	0.27245	0.44434
0.105301	0.392512	0.357995
0.0721964	0.275275	0.301245
0.0950822	0.063718	0.168821
0.0269519	0.0584831	0.305456
0.16946	0.248679	0.564322
0.0842891	0.124633	0
0.326226	0.266889	0.397826
0.380783	0.276184	0.430208
0.123897	0.468779	0.262338
0	0.58915	0.419603
0.0668991	0.22352	0.142103
0.287222	0.34926	0.261231
0.0999118	0.166116	0.072949
0.207712	0.285961	0.371742
0.112841	0.523351	0.135294
0.0764621	0.180992	0.313027
0	0.154122	0.31071
0.239446	0.550287	0.292714
0.131186	0.231043	0.488405
0.169245	0.291597	0.221297
0.0352278	0.119844	0.530715
0.245913	0.262076	0.290765
0.198512	0.339899	0.215487
0	0.472317	0.283875
0.1273	0	0.17397
0.228539	0.42817	0.411825
0.141364	0.410447	0.366802
0.198166	0.328191	0.224829
0.147487	0.310641	0.409508
0.165	0.366654	0.214389
0.227839	0.258562	0.291038
0.0161887	0.578261	0.226519
0.112955	0.526406	0.359177
0.0405404	0.668642	0.33231
0.234936	0.599696	0.356044
0.127561	0.147412	0.315821
0.289525	0.46824	0.278765
0.0873468	0.0897877	0.197737
0.0413255	0.556646	0.532769
0.313387	0.337348	0.292664
0.207659	0.45189	0.220398
0.133236	0.515582	0.385538
0.15348	0.483536	0.478677
0	0.504577	0.489859
0.133543	0.513527	0.302517
0.177047	0.355564	0.303526
0	0.539074	0.333122
0.0659975	0.505634	0.476654
0.207659	0.306108	0.497705
0.232233	0.384199	0.487279
0.217777	0.101013	0.377952
0.109748	0.320366	0.296279
0.232233	0.450302	0.284574
0.121212	0.318473	0.444607
0.0808406	0.274763	0.501712
0.0792318	0.188128	0.167215
0.0488581	0.424459	0.495912
0.110511	0.0767737	0.396394
0.166667	0.179224	0.317761
0.217485	0.299554	0.294957
0.1588	0.241143	0.436324
0.367979	0.0830831	0.179556
0.5	0.317965	0.470791
0.325952	0.450107	0.45298
0	0.254238	0.545814
0	0.335988	0.145753
0.488564	0.309023	0.321429
0.20968	0.381243	0.502214
0.232233	0.253133	0.0983537
0.347712	0.33056	0.184787
0.0833333	0.100096	0.43395
0	0.310135	0.526333
0	0	0.191258
0.250654	0.135981	0.270833
0.232233	0.0380232	0.318882
0	0.160236	0.381768
0.232233	0.0542064	0.285682
0	0.32128	0.233707
0	0.0351086	0.0932655
0.108193	0.217992	0.2999
0.309731	0.164871	0.233853
0	0.117591	0.53153
0.464002	0.375321	0.538555
0.119844	0.172645	0.401146
0.522073	0.305598	0
0.283163	0.310564	0.583507
0	0.387471	0.303098
0	0.304445	0.180422
0	0.4	0.323405
0.228095	0.0342042	0.419375
0	0.250617	0.270982
0	0.35651	0.517747
0	0.326717	0
0	0.384363	0.16688
0.155772	0.0567182	0.161876
0.291496	0	0
0.14261	0.274076	0.479062
0.095456	0.47852	0.562662
0.237351	0.444858	0.56259
0.178827	0.285379	0.424635
0.428327	0.105489	0.198866
0	0.125081	0.258354
0.122528	0.290828	0.279365
0.625	0.481948	0.110761
0.474912	0.0568321	0.19465
0.353603	0.153989	0.279583
0.155772	0.174243	0.346995
0.625	0.0645562	0.490385
0	0.166084	0.232233
0	0.602307	0.313274
0.174317	0.139219	0.430707
0.1875	0	0.255026
0.230835	0.391454	0.427513
0.148096	0.20049	0.38937
0.272848	0.30179	0.343137
0.298212	0.234914	0.392485
0.239601	0.48943	0.385505
0.300247	0.489822	0.196253
0.295751	0.423001	0.369095
0	0.288622	0.303107
0.188265	0.287269	0.284027
0.198849	0.244103	0.329258
0.536845	0.397691	0.258991
0.413035	0.152838	0.59375
0.440729	0.0793586	0.456486
0.194493	0.149241	0.437931
0.39491	0.0880642	0.131186
0.187323	0.304915	0.372975
0.119376	0.26435	0.386068
0	0.280276	0.384825
0.152396	0	0.208179
0.4095	0.174548	0.332706
0.4	0.569683	0.183349
0.173327	0.19297	0.582063
0.219453	0.221469	0.388525
0.196286	0.451142	0.581985
0.218539	0.218079	0.259595
0.0679312	0.433464	0.268058
0.591758	0.315109	0.428913
0.244338	0.246922	0.416324
0.0677712	0.230124	0.38314
0.322782	0	0.453153
0	0.0891728	0.401518
0.296426	0.112813	0.441976
0.214048	0.214942	0.503097
0.248976	0.193513	0.292504
0.0365919	0.325827	0.400671
0.222397	0.335891	0.30484
0.157072	0.52366	0.501246
0.263486	0.335771	0.262885
0.0491736	0.27999	0.269697
0.199713	0.177237	0.4955
0.0992908	0.330156	0.208794
0.0607867	0.451042	0.305
0.222942	0.372139	0.408868
0.107304	0.479377	0.221862
0.160893	0.541667	0.541667
0.103079	0.113463	0.401146
0.46059	0.381746	0.124628
0.199125	0.178265	0
0.203913	0.481169	0.343423
0.476741	0.184241	0.452753
0.173199	0.426064	0.300352
0.232233	0.265576	0.310834
0.131169	0	0.370288
0.155747	0.0938646	0.209929
0.044247	0.389553	0.367431
0.167565	0.202237	0.194564
0.12622	0.440143	0.330403
0.23983	0.564722	0.412828
0.231059	0.115398	0.409181
0.163831	0.0855137	0.095479
0	0.420584	0.342705
0.583925	0.19711	0.247859
0.113716	0.0780547	0.343631
0.115846	0.504613	0.378547
0.355973	0.344501	0.237262
0.190578	0.525725	0.262533
0.312583	0.369062	0.279503
0.048733	0.191867	0.348027
0	0.315072	0.361678
0.623577	0.128387	0.473102
0.134211	0.185166	0.545472
0.185306	0.560524	0.356411
0.232233	0.289679	0.461485
0.226116	0.151206	0.473251
0.317094	0.197697	0.358366
0.138912	0.287174	0.412728
0.151153	0.515716	0.456007
0.184377	0.219965	0.431155
0.29363	0.405161	0.565387
0	0.330725	0.48533
0.0469254	0.361111	0.463354
0.167949	0.148439	0.26079
0.462581	0.255721	0.331658
0.625	0.236484	0.263694
0.432522	0.211597	0.453397
0.207659	0.167435	0.450059
0.141589	0.219872	0.167998
0.281385	0.388889	0.482959
0.152516	0.298964	0.299675
0.15839	0.121003	0.357996
0.130519	0.166483	0.444776
0.348162	0.29083	0.190369
0.493915	0.538137	0
0.124007	0.187146	0.46818
0.5	0	0.302622
0.0913569	0.180095	0.151465
0.185582	0.299697	0.541667
0	0.350734	0.427306
0.26874	0.0648101	0.475617
0.299272	0.337717	0.174592
0.0289871	0.20513	0.350349
0.187289	0.305689	0.387904
0	0.125908	0.310411
0.0663465	0.321429	0.58067
0.026469	0.345169	0.711638
0.0543059	0.149666	0.232233
0.29843	0.400964	0.437083
0.290811	0.415912	0.220897
0.107212	0.307861	0.569535
0.0759433	0.547728	0.137721
0.382229	0.0776477	0.459242
0.066552	0.534738	0.550551
0.587035	0.172455	0.072949
0.184003	0.581671	0.401146
0.0879683	0	0.0910972
0.141645	0.640838	0.368838
0.0584854	0.232233	0.373859
0.310333	0.396375	0.482412
0.0742795	0.559805	0.311119
0.0833333	0.403404	0.419375
0.102239	0.305291	0.323707
0.312217	0.586891	0.322419
0.0982492	0.165024	0.402891
0	0.459156	0.679203
0.354981	0.104527	0.208694
0.281916	0.236266	0.44489
0.146142	0.311827	0.350476
0.356893	0.181772	0.149651
0	0.200551	0.438376
0.214286	0.186082	0.200241
0.222444	0.208891	0.389037
0.148662	0.321429	0.460208
0.128773	0.1875	0.306951
0.0679996	0.549784	0.412438
0.0833333	0.607143	0.249003
0.172185	0.477336	0.153888
0.152339	0.126319	0.17655
0.307861	0.455227	0
0.5	0.22092	0.382641
0.506468	0.457319	0.509261
0.21991	0.330324	0
0.625	0.216394	0.434782
0.366259	0.542579	0.434604
0.266383	0.399627	0.232233
0.23324	0.1504	0.597598
0.0869731	0.436719	0.708333
0.284102	0.279583	0.477229
0.218469	0.298046	0.337621
0.046564	0.0573609	0.785714
0.240907	0.483026	0.338758
0.139144	0.411304	0.354236
0.419375	0.336848	0.328478
0	0.332045	0.517448
0.390363	0.314375	0.315032
0.0985946	0.251304	0.208631
0.485011	0.505051	0.547637
0.194245	0.286174	0.202304
0.0163497	0.307861	0.322152
0.166556	0.483319	0.411778
0.265708	0.370949	0.203226
0.233969	0.287959	0.593331
0.118856	0.495433	0.47652
0.339183	0.278659	0.142015
0.114038	0.462167	0.211725
0.331462	0.268776	0.366567
0	0.0596363	0.48478
0.0674799	0.147168	0.42604
0.189088	0.259612	0.366328
0.17405	0.1875	0.332007
0	0.240965	0.4
0.625	0.0681142	0.489781
0.0614372	0.423929	0.428365
0.203005	0.170201	0.411515
0.323959	0.19204	0.446811
0.191804	0.151986	0.483606
0.228512	0.195581	0.361111
0.405406	0.178341	0.33962
0	0.448449	0
0.256047	0.2203	0.4
0.114534	0.423632	0.072949
0.100637	0.323516	0.232233
0.0691905	0.353022	0.567985
0.515326	0.513632	0.546504
0.310438	0.0966682	0.487163
0.29927	0.269005	0.232233
0.115012	0.332965	0.166667
0.243097	0.142624	0.541961
0	0.289716	0.287621
0.13905	0.278151	0.625
0.0883809	0.521016	0.266628
0.0770653	0.527814	0.450051
0.115885	0	0.0851275
0.1875	0.367337	0.188534
0.232233	0.139017	0.454093
0	0.359517	0.434444
0.18964	0.261957	0.432512
0.324786	0.509674	0.405477
0.232233	0.475176	0.20033
0.148289	0.380667	0.381139
0.439651	0.217278	0.529742
0.192392	0.445848	0.625
0.221292	0.419375	0.2816
0.199223	0.442578	0.284055
0.072949	0.583333	0.146995
0.348751	0.483268	0.425723
0.221307	0.399476	0.35
0.201114	0.189975	0.494275
0.239601	0.478401	0.558595
0.220207	0.399364	0.497263
0.232233	0.550183	0.47193
0.214721	0.502982	0.211551
0.1875	0.384148	0
0.255327	0.599556	0.207659
0.232233	0.288548	0.227273
0	0.192295	0.318781
0.185359	0.785714	0.499832
0.142979	0.252916	0.306369
0.30043	0.58054	0.211695
0	0.537677	0.266316
0.134386	0.28458	0.157783
0.28868	0.433252	0.528449
0.0579938	0.785714	0
0.530807	0.176021	0.393767
0.225297	0.232233	0.19422
0.293135	0.232233	0.486646
0.394514	0.232233	0.313576
0.296584	0.343418	0.459874
0.220729	0.588466	0.258088
0.107116	0	0.406804
0.0924092	0.590176	0.270936
0.1875	0.12395	0.152061
0.114712	0.606489	0.428883
0	0.363179	0.512383
0.325518	0.398728	0.356715
0.136447	0.183636	0.388326
0.415635	0.392768	0.524301
0.102405	0.535714	0.476518
0.254857	0.331098	0.303205
0	0.361399	0.47975
0.146359	0.212469	0.313328
0.221399	0.451776	0.131389
0.135437	0.327852	0.5
0.294487	0.419375	0.487135
0.291193	0.460725	0.487013
0.135361	0.419375	0.487157
0.225504	0.239601	0
0	0.380776	0.224935
0.239601	0.625	0.29677
0.232233	0.361837	0.265495
0.0953181	0.0905232	0
0.474383	0.36026	0.301099
0.328024	0.329412	0
0.261698	0.429962	0.625
0.192687	0.107515	0.166667
0.222005	0.198866	0.511795
0.404558	0.19563	0.298113
0.494308	0.177477	0.137082
0.198866	0.224231	0
0.0363894	0.126614	0.516084
0	0.296028	0.123866
0.166278	0.0634862	0.297051
0.20722	0.158932	0.462674
0.0999097	0.373457	0.520049
0.0770653	0.114521	0
0.0829767	0.119875	0.469311
0.271226	0.239286	0.199186
0.232233	0.298762	0.4
0.187748	0	0.383905
0.229236	0.34747	0.44411
0.293599	0.0770342	0.45
0.192022	0.440411	0.625
0.280917	0.116746	0.245583
0.0477395	0.00734937	0.264651
0.438631	0.598284	0.385734
0.190957	0.0501778	0.1151
0.264669	0.256991	0.544751
0.134432	0.361111	0.506799
0.149046	0.328571	0.242296
0.17708	0.0699998	0.569637
0.454896	0.173929	0.490192
0.0456405	0.443472	0.50738
0.194638	0.23413	0.461048
0.305221	0.25518	0.257277
0.473963	0.454273	0.417877
0.226541	0.23885	0.315012
0.248627	0.378547	0.514706
0.185601	0.392857	0.5
0.361111	0.090733	0.442106
0.0732591	0.322436	0.184793
0.126144	0.168565	0.469956
0.0435692	0.0860277	0.502214
0.171944	0.186752	0.421915
0.417096	0.0831019	0.526873
0.107681	0.146995	0.385686
0.0556165	0.413041	0.418733
0.0476171	0.08333	0.497328
0.452443	0.232233	0.23347
0.169577	0.0544667	0.345159
0.173009	0.384247	0.220078
0.239601	0.222076	0.608808
0.327385	0.215365	0.232233
0	0.29744	0.875
0.109446	0.478367	0.170893
0.282838	0.119844	0.239601
0.151847	0.296284	0.131562
0.3354	0.19926	0.436929
0.125502	0.111455	0.451456
0.188703	0.166173	0.476686
0.346586	0.344679	0.38367
0.390253	0.428327	0.238436
0.209487	0.522222	0.60177
0.239601	0.279583	0.247434
0.296617	0.502487	0.220897
0.139612	0.0444058	0.256765
0.0280318	0.267756	0.550357
0.0896658	0.13	0.321429
0.137119	0.194644	0.50113
0.159093	0.14241	0.381046
0.26424	0.0542508	0.259467
0.218882	0.229571	0.47794
0.25234	0.402707	0.227
0.0262899	0.184414	0.127198
0	0.625	0.232233
0.155772	0.233545	0.129405
0.0764698	0.18529	0.493295
0.32052	0.33727	0.3144
0.317854	0.086079	0.343684
0.162892	0.451628	0.587549
0.0680926	0.0557572	0.411359
0.0972222	0.526448	0.372474
0.0438611	0.0740424	0.372606
0.0540591	0.297145	0.59375
0.0693456	0.290214	0.192155
0.236812	0.125938	0.311139
0.189121	0	0.29208
0.197789	0.174293	0.155772
0.117332	0.305816	0.232233
0.1505	0.181257	0.369416
0.0955372	0.163115	0.564218
0.0624869	0.474386	0.355163
0.400856	0.298105	0.414124
0	0.536577	0.27724
0.23386	0.0737492	0.237263
0.515708	0.339948	0.310032
0.207204	0.463999	0.573615
0.120483	0.272144	0.378129
0.300616	0.143974	0.355687
0.22627	0.498776	0.321856
0.4	0.175453	0.591077
0.451679	0.171947	0.419375
0.166667	0.0992388	0.517758
0.0906297	0.229985	0.228401
0	0.232781	0.132338
0.232233	0.269595	0
0.0157485	0.251501	0.476518
0.201595	0.498855	0.123868
0.243562	0.400602	0.215473
0.11822	0.357421	0.323959
0.1421	0.0667437	0.235647
0.157865	0.128979	0
0.4	0.304076	0.124452
0.19542	0.22505	0.361111
0.115474	0.193448	0.169072
0.233071	0.419375	0.252992
0	0.213705	0.625
0.111237	0.469549	0.534323
0.0823676	0.481242	0.200912
0.0345036	0.239523	0.138912
0.343814	0.4	0.256646
0.354777	0.625	0.625
0	0	0.204155
0.243204	0.102817	0.163272
0.0848151	0	0.62786
0.0998939	0.111937	0.281176
0.305802	0.169076	0.279997
0.0510229	0.0515008	0.362603
0.0723428	0.286493	0.161198
0.249729	0.0845368	0.522744
0.302912	0.164462	0.391003
0.299362	0.625	0.280344
0.314124	0.0339018	0.561119
0.189367	0.125882	0.3097
0.0307687	0.194048	0.346123
0.1875	0.175686	0.349175
0	0.0984726	0.335677
0.0833333	0.395458	0.408916
0.0912834	0.681262	0.263286
0.0927548	0.293161	0.428571
0.15181	0.341584	0.525376
0.0666495	0.0782304	0.291928
0.183361	0.254616	0.502531
0.12638	0.577284	0.226703
0.171513	0.281722	0.53219
0.185141	0.227182	0.416527
0.099976	0.392834	0.218344
0.0620204	0.322377	0.254109
0.0940072	0.501319	0.317893
0.321029	0.289262	0
0.222388	0.217052	0.593416
0.298536	0.212856	0.280341
0.283979	0.225604	0.439656
0	0.274635	0.408492
0.0901395	0.440814	0.263588
0.421707	0.327852	0.46042
0.0634433	0.10882	0.381399
0.0616533	0.110868	0.361172
0.0997249	0.178433	0.212303
0.0360799	0.37561	0.312077
0.0833508	0.479511	0.349074
0.0465323	0.119299	0.448551
0.0967022	0.309096	0.432913
0.4	0.247812	0.300815
0.0613377	0.328452	0.357656
0.644198	0.473303	0.445564
0	0.0830861	0.487135
0.0244482	0.361111	0.638889
0.475291	0	0.382167
0.270664	0.17962	0.392729
0.0544649	0.268526	0.0802072
0.375769	0.252785	0.31571
0.0720045	0.526015	0.655747
0.133001	0.446197	0.504778
0.0883516	0	0
0.225062	0.230648	0.488612
0	0.0985515	0.280501
0.29863	0.327841	0.42565
0.207659	0.0463304	0.159
0.165747	0.658734	0.32025
0	0.0875091	0.425451
0	0.562581	0.484047
0.0253732	0.262714	0.422063
0.149045	0.135185	0.325126
0.181489	0.299432	0.220897
0.194215	0.109276	0.269936
0.433117	0.328726	0.250121
0.0394946	0.301245	0.287606
0.0833333	0.170292	0.639631
0.246659	0.276478	0.640055
0.0557522	0.330694	0
0.0439758	0.630957	0.297221
0	0.0720956	0.511021
0.220897	0.155772	0.194867
0.0226768	0.124784	0.349938
0.234452	0.351392	0.359955
0.0757086	0.456753	0.470609
0.131154	0.148075	0.313801
0.172227	0.403801	0.482557
0.232233	0.365479	0.612772
0.0578995	0.5	0.266437
0.143554	0.17571	0.415843
0.156912	0.114301	0.477778
0.16476	0.091764	0
0.232233	0.57162	0.110023
0	0.302709	0.348678
0.0935948	0.165226	0.354624
0.104519	0.180876	0.22377
0.152525	0.232233	0.475
0.0590466	0.0729162	0.351277
0.4	0.405534	0.400281
0.419375	0.347018	0.65
0.0225107	0.130401	0.254843
0.297915	0.110778	0.306406
0.082785	0.150114	0.241461
0.0553169	0.163346	0.465259
0	0.496316	0.445198
0.172465	0.257074	0.584603
0.192755	0.400426	0.345237
0.130813	0.35438	0.346138
0.14221	0.377587	0.269426
0.0606556	0.0448127	0.287217
0.0994557	0.159687	0.335992
0	0.283999	0.377117
0.110296	0.520272	0.498305
0.0706147	0.306343	0.37259
0.0445133	0.20437	0.347196
0.480227	0.192336	0.418809
0.0629544	0.377417	0.378651
0.277305	0.0640903	0.427957
0.422058	0.363147	0.204171
0.0438479	0.334885	0.5144
0.436582	0.278758	0.106798
0.209219	0.298078	0.307861
0.269794	0.345442	0.30636
0.191012	0.649227	0.446672
0.0514872	0.0840207	0.49344
0.072949	0.285714	0.369062
0.162199	0.561924	0.446429
0.246654	0.267835	0.49572
0	0.204435	0.526048
0	0.0696996	0.238421
0.153427	0.333302	0.35847
0.277382	0.0839514	0.410581
0.072949	0.404967	0.211968
0.154557	0.116313	0.447395
0.176437	0.285	0.260496
0.139643	0.102197	0.340801
0.180913	0.291971	0.363113
0.0877413	0.203021	0.407969
0.120849	0.192789	0.528406
0.20388	0.10596	0.534866
0.345864	0.0970738	0.598284
0.406789	0.264354	0.461451
0	0.38273	0.232233
0.232233	0.0791636	0.493479
0	0.305381	0.487886
0.203875	0.232233	0.419375
0.0702853	0.0721275	0.590241
0	0.0507032	0.785714
0.570349	0.681262	0.072949
0.143527	0.514894	0.357905
0.110169	0.30927	0.2189
0.20056	0.370543	0.208128
0.222104	0.382341	0.442214
0.223323	0.177633
0.0639379	0.374415
0.0953707	0.12791
0.0691533	0.210015
0.188121	0.5
0.208379	0.0893276
0.0602981	0.408304
0.165354	0.205739
0.0545549	0.0603475
0.0577673	0.408102
0.0909712	0.173895
0.0823021	0.360272
0.218865	0.471321
0.264112	0.262419
0	0.503335
0.0344094	0.191019
0	0.345792
0.143483	0.184036
0.267052	0.31204
0.054795	0.253501
0	0.413746
0.281205	0.419375
0	0.148997
0.351459	0.17397
0.112365	0
0.321281	0.476518
0.0398109	0
0	0.174923
0	0.0482447
0	0.044248
0.156202	0.265666
0.0210643	0.115809
0.157792	0.232233
0.232233	0.557808
0	0.16932
0.096337	0.211329
0.476518	0.134343
0.113826	0.318629
0.232233	0.196668
0.542432	0.562662
0.170814	0.134315
0.625	0.359445
0.608896	0.631559
0	0.400379
0	0.191892
0.0855521	0.254915
0.36977	0.123526
0	0.350927
0.0833333	0.278315
0.0962415	0.0907059
0.458492	0
0.0217792	0.35768
0.0378761	0.398075
0	0.36459
0.232233	0
0.231603	0.467391
0	0.134446
0.188171	0.0403545
0	0.312742
0	0.301707
0.122512	0.305116
0.283979	0.321461
0.450116	0.177087
0.430801	0.399592
0	0.295893
0.42263	0.36234
0	0.355443
0	0.176102
0	0.396366
0.133598	0.36722
0.332481	0.343004
0	0.0579674
0.324087	0.241594
0	0.233295
0.0833333	0.0822523
0.624287	0.326385
0	0.384663
0	0.354532
0	0.307565
0.232233	0.625
0	0.541361
0	0.19563
0.195736	0.0682671
0.288178	0.445279
0.0613498	0.149823
0.0744702	0.377115
0	0.502828
0.125553	0.265535
0.152167	0.0934229
0.325831	0.536577
0.194336	0.5
0	0.232233
0.209042	0.396204
0.207659	0
0.191613	0.211609
0.317914	0.319291
0.289381	0.27886
0.093653	0.321541
0.0820626	0.164846
0.704425	0.394391
0.101216	0.278529
0.0865589	0.28517
0.0828241	0.271429
0.0894031	0.199536
0.0880486	0.0631824
0.0377578	0.625
0.224598	0.350956
0.229618	0.283665
0.0508275	0.0684184
0.0740315	0.408293
0.337963	0.395619
0.0678709	0.291525
0.315913	0.122204
0.192149	0.410431
0.361111	0.0933603
0.143059	0.198597
0.0777207	0.0635433
0.356368	0.625
0.088995	0.362483
0.0762763	0.262411
0.0586464	0.486717
0.17224	0.419375
0.258756	0.408975
0.239601	0
0.104992	0.139512
0.330996	0.213567
0.232233	0.39882
0.316579	0
0.0846019	0.263847
0.0485903	0.403178
0.262338	0.138241
0.053587	0.431765
0.0829108	0.367139
0.15436	0.208442
0.12095	0
0.587858	0.453384
0.0795581	0.293319
0.027226	0.262972
0.159896	0.104087
0.0649485	0.0694317
0.314644	0.0659551
0.0106041	0.299188
0.433392	0.232233
0.191546	0.430208
0.0568652	0.1505
0.0398393	0.390186
0.30204	0.307036
0.0720858	0.302477
0.100232	0.331658
0.0740606	0.423033
0.117102	0.228062
0.0790415	0.397597
0.0423355	0.167835
0.0426153	0.373074
0.222432	0.0900238
0.291887	0.167079
0	0.0750012
0.155772	0.197006
0.322222	0.297277
0.378554	0.0822837
0.0601708	0.102829
0.135683	0
0	0.200153
0.176728	0.379902
0.0854709	0.215879
0.0427853	0.187008
0.4	0.0414612
0.106038	0.23911
0.13869	0.367299
0.0903246	0.0233176
0.166404	0.386365
0.0353441	0.180898
0.228377	0.252706
0.376543	0.24962
0.0430733	0.261491
0.0291152	0.255096
0.273072	0.274777
0.213404	0.244517
0.46798	0.466469
0.319291	0.249583
0.373898	0.481055
0.0882758	0.3679
0.06342	0.256633
0.168438	0.237714
0.197736	0.124143
0.4	0.320756
0.0193928	0.395833
0.0338463	0.497336
0.238581	0.166701
0.625	0.374914
0.51595	0.232233
0.217897	0.143155
0.19465	0.242997
0	0.27569
0.1875	0.191999
0.0530353	0.181919
0.238915	0.619349
0.105195	0.343794
0.115929	0.369886
0.537747	0.120547
0.0439062	0.561936
0.0519723	0.381091
0.104438	0.326606
0.0830097	0.232233
0.201418	0.420164
0.066218	0.16137
0.118897	0.283844
0.41091	0.196596
0.124128	0.471189
0.265382	0.115459
0.0600074	0.216007
0.413035	0.268521
0.0612311	0.437404
0.0959599	0.219448
0.352217	0.100625
0.0289079	0.157029
0.111773	0.161307
0.130104	0.461858
0.271698	0
0.036513	0.163684
0.122838	0.481113
0.0475141	0.34943
0	0.0566288
0.0598885	0.163965
0.147361	0.103778
0.0946425	0.34574
0.0454639	0.108128
0.103547	0.465136
0.108112	0.375972
0.140533	0.300034
0.0932555	0.301245
0	0.381243
0.166215	0.338008
0.306323	0.303368
0	0.329743
0.17869	0.295021
0.5	0.0823506
0.0944712	0.174579
0.196814	0.277299
0.171664	0.508547
0.158556	0.121381
0.31909	0.319556
0.0722339	0.13336
0	0.373311
0.218614	0.0832711
0.207659	0.60136
0.361157	0.117583
0.146922	0.239583
0.0813798	0.35487
0.12693	0.0335413
0.238796	0.141589
0.365127
0.0678753
0.11031
0.0628016
0.210566
0.0238372
0.0327592
0.274255
0.148545
0.266999
0.0380345
0.309778
0
0.0382867
0.0883806
0.676904
0.419375
0.427894
0.274147
0.0278463
0
0.400834
0.267413
0.266868
0.195325
0.0505406
0.0482689
0.13979
0.299757
0.381916
0.0569195
0.0900149
0.0670769
0.0366788
0.0728697
0.0458142
0
0
0.288944
0.223768
0.122146
0.0521864
0.0210103
0.0899195
0.216337
0.0707644
0.307861
0.0386296
0.13281
0.220009
0.0312125
0.212008
0.143772
0

## Sheet: identify outliers 
P42 WT	P42 KI	P42 KO
0.100083	0.307053	0.250702
0	0.219629	0.460403
0	0.168718	0.265592
0.179353	0.449597	0.229699
0.0437728	0.458899	0
0.0275415	0.0804892	0
0.28689	0.702299	0.4
0.112664	0.448484	0
0.275247	0.21243	0.315213
0.309951	0.0963879	0.144616
0.0143137	0.351043	0.419824
0.0703222	0.222522	0.63544
0.0680203	0.551484	0.127813
0.0817053	0.0899085	0.355771
0.236873	0.0318703	0.625
0.353433	0.450224	0.33464
0.137561	0.625	0.375277
0.0681261	0.379233	0.173251
0.159236	0.383388	0.163756
0.0404561	0.600734	0.295731
0	0.619354	0.201298
0.157189	0.0467263	0.246534
0.188002	0.454085	0.174875
0.5	0.464643	0.407159
0.419375	0.237867	0.436575
0.0260343	0.124391	0.49678
0.0783926	0.18978	0.330231
0.270536	0.136753	0.360602
0.4	0.369775	0.26697
0.151159	0	0.439005
0.196414	0.629566	0.231039
0.0507842	0.114464	0.481216
0.0977264	0.155772	0.304658
0.108238	0.526827	0.24874
0.100301	0.521525	0.356932
0.0898764	0.354856	0.362165
0.084416	0.496907	0.279026
0.0504132	0.590176	0.5288
0.0956157	0.534866	0.47076
0.0629438	0.239601	0.520424
0.160085	0.0986847	0.307976
0.26896	0.199312	0.294249
0.0822199	0.11279	0.239601
0.142303	0.102005	0.218297
0.134219	0.499226	0.625
0.0712002	0.785714	0.112057
0.0667678	0.41454	0.271071
0.136203	0.449505	0.538186
0.22328	0.572215	0.232233
0.278088	0.625	0.137714
0.112536	0	0.148654
0.0498721	0.671334	0.369062
0.214242	0.142488	0
0	0.510019	0.79627
0.242245	0.266634	0.294204
0.0924444	0.164814	0.647321
0.110864	0.485703	0.440857
0.052942	0.245617	0.638301
0.0775322	0.490929	0.359079
0.266093	0.149913	0.189226
0.199327	0.415563	0.107649
0.389051	0.354216	0.321175
0.224777	0.406028	0.459198
0.249253	0.278603	0.21824
0.190415	0.0621015	0.410485
0.0862407	0.232552	0.356168
0.351949	0.047168	0.369683
0.0474419	0.594052	0.313153
0.511119	0.33545	0.18034
0.386651	0.491959	0.225625
0.106836	0.544379	0.540871
0.025317	0	0.448619
0	0.0998419	0.349636
0.163432	0.569769	0.419375
0.485208	0.224451	0.430208
0.0386919	0.461451	0.310996
0.202519	0.303925	0.446429
0.106169	0.0635977	0.444634
0.0890868	0.303705	0.440183
0.168614	0.384797	0.5
0.042788	0.305854	0.198866
0.0833333	0.303301	0.597154
0.162274	0.285878	0
0.0486323	0.226548	0.4
0.41166	0.399625	0
0.202888	0.175495	0.245914
0.131294	0.382508	0.309309
0.077563	0.0762965	0.474564
0.106139	0.101176	0.271018
0.312212	0.173859	0.384932
0.0354338	0.490016	0.149749
0.0640785	0.236571	0.264443
0.0432256	0.19285	0.308538
0	0.468031	0
0.206519	0.34991	0.419375
0.092703	0.584293	0.236248
0.073231	0.178653	0.232233
0.315833	0.232548	0.315483
0.271912	0.479062	0.183553
0.243937	0.226468	0.484627
0.0319941	0.0299304	0.2933
0.0754705	0.54751	0.25973
0.022947	0.435847	0.156174
0.0106991	0.44029	0.625
0.264943	0.275239	0.194468
0.0651919	0.493097	0.290793
0.196154	0.127747	0.27168
0.0455309	0.508257	0.324384
0.500039	0.34516	0.32045
0.0550899	0.0930157	0.344888
0.0901272	0.0929122	0.160951
0.0614128	0.244276	0.445174
0.0714594	0.296914	0.371846
0.0277991	0.217526	0.342929
0.0414933	0.0958004	0.371085
0.26312	0.56377	0.245882
0.114436	0.111816	0.279071
0.171484	0	0.298113
0.0661845	0.195165	0.157849
0.0766972	0.0718123	0.351845
0.272509	0.567969	0.498887
0	0.481526	0.419375
0.223015	0.526803	0.256902
	0.4	0.239601
0.0527443	0.381964	0.430877
0.0905397	0.470126	0.492345
0.154912	0.436993	0.39523
0.0231726	0.229444	0.194858
0.0305522	0.0405616	0.340101
0.0531235	0.361111	0.16748
0.232233	0.271169	0.487373
0.0324172	0.484041	0.626102
0.0464432	0.577013	0.207503
0.0326791	0.453079	0.429543
0.0584436	0.178228	0.222677
0.0958504	0.350308	0.224194
0.198866	0.541667	0.564577
0.0212945	0.168154	0.519696
0.0764422	0.373583	0.0447133
0.0822681	0.114105	0.271502
0.253024	0.252121	0.0581568
0.301245	0.272727	0.188451
0	0.43638	0.344603
0.482823	0.606181	0.156329
0.0496154	0.443809	0.431088
0.135816	0.15512	0.476365
0.419375	0.412105	0.576239
0.131734	0.315252	0.34434
0.039475	0.219776	0.623994
0.398864	0.475692	0.416004
0	0.274139	0.546923
0.232233	0.4765	0.505902
0.0518381	0.535342	0.278378
0.063824	0.353057	0.477092
0.0630645	0.357922	0.276427
0.205313	0.144131	0.453973
0.333231	0.14198	0.544745
0.131387	0.470713	0.470295
0.481764	0.279755	0.441813
0	0.0748506	0.417433
0.0905054	0.335674	0.567333
0.0559515	0.0882039	0.659167
0.0410075	0.0809594	0
0.131519	0.124459	0.167173
0.529835	0.340877	0.327996
0.06004	0.40109	0
0.0924134	0.117071	0.4
0.133367	0.0255364	0.22472
0.0422811	0.060775	0.232233
0.22983	0.405236	0.588162
0.0667477	0.542406	0.186913
0.198484	0.407209	0.466294
0.0372882	0	0.239442
0.27031	0.120622	0.205324
0.139612	0	0.344044
0.177063	0	0.166483
0.205636	0.237016	0.287184
0.0409868	0.384226	0.239601
0.307698	0.0286476	0.0864078
0.0251634	0.475711	0
0.14077	0.394289	0.0770653
0.0895457	0.475283	0.0797897
0.0620919	0.0801049	0.323909
0.0406281	0.515768	0.349092
0.492705	0.0455542	0.583333
0.379896	0.164489	0.523332
0.129277	0.129882	0.355864
0.168	0	0.51074
0.108134	0.540076	0.237312
0.1166	0.303128	0.328452
0.461451	0.256393	0.1875
0.0639907	0.342882	0.306192
0.0217679	0.394404	0.163853
0.0448609	0.494386	0.558916
0.042424	0.0921584	0.566341
0.0652309	0.232233	0.231876
0.441024	0.351232	0.119668
0.227752	0.356867	0.33611
0.125704	0.511378	0.450676
0.0537488	0.247771	0.239476
0.128516	0.132036	0.1334
0.192019	0.443224	0
0.146774	0.637191	0.548645
0.050017	0.440473	0.446429
0.368856	0.290078	0.434569
0.452003	0.497102	0.239601
0.199723	0.188425	0.632705
0.164243	0.406296	0.166667
0.0686758	0.518876	0
0.0442673	0.323491	0.503172
0.253337	0.189464	0.225297
0.352217	0.407378	0.385876
0.116396	0.147312	0.0978067
0.042844	0.501842	0.300158
0.0336733	0.488442	0.346134
0.0658594	0.195341	0.521121
0.208133	0.522961	0.474359
0.465697	0.539992	0.490563
0.126099	0.08174	0.125809
0.0685808	0.079824	0.317919
0	0.299926	0.321295
0.118335	0.291192	0.272032
0.24029	0.29699	0.264728
0.109241	0.632792	0.306001
0.36388	0.199426	0.435195
0.487171	0.358536	0.368292
0.0295242	0.288025	0.625
0	0.280771	0.224656
0.0740248	0.236526	0.55386
0.213435	0.203939	0
0	0.182438	0.46273
0.375703	0	0.229743
0.0305132	0.324159	0.274426
0.0903238	0.541667	0.306446
0.119844	0.119785	0.371441
0.235446	0.216876	0.440939
0.0566735	0.165548	0.325767
0	0.515858	0.43239
0.0771817	0.247072	0.554496
0.0508756	0.571947	0.456126
0.0348501	0.16095	0.397178
0	0.349785	0.0715969
0.265355	0.446061	0.199676
	0.421911	0.325762
0.0761581	0.211329	0.506766
0.461451	0.56889	0.476707
0.117131	0.24258	0.220185
0.126918	0.361111	0.101055
0.239527	0.402817	0.0441025
0.0993167	0.308852	0.217845
0.123694	0.169883	0.12252
0	0.246016	0.453419
0.100966	0.283903	0.289504
0.0295783	0.410447	0.447127
0.090602	0.0659991	0.416172
0.130273	0.235622	0.198634
0.0733828	0.438335	0.249088
0.0260355	0.150966	0.235832
0.26946	0.26533	0.0770761
0.19162	0.17608	0.490222
0.159133	0.378874	0.405814
0.132646	0.256848	0.298653
0.1875	0.311233	0
0.230151	0.111338	0
0.0958444	0.0894175	0.475617
0.0998535	0	0.373582
0.097505	0.342539	0.287259
0.0219818	0.538462	0.359761
0.113826	0.445664	0.554469
0.296526	0.561408	0.172164
0.131931	0.128621	0.466493
0.137296	0.33145	0.402469
0.103589	0.458455	0.419375
0.27181	0.423443	0
0	0.515785	0.369069
0.0833333	0	0.439766
0.146166	0.399374	0.390265
0.513091	0.342076	0.270574
0.13776	0.442675	0.476602
0.325934	0.287457	0.544463
0.267931	0.45476	0.455227
0.12552	0	0.251989
0.0666658	0	0.59375
0.0381408	0.137738	0.342966
0.103452	0.378238	0.541911
0.140411	0.395599	0.374286
0.0751252	0.220395	0.318887
0.213606	0.0806369	0.567867
0.24438	0.54571	0.541667
0.0637595	0.298516	0.388121
0.200901	0.253919	0.184827
0.152085	0	0.166773
0.154382	0.068937	0.236156
0	0.481258	0.284194
0.209756	0.43821	0.247687
0.0440957	0.26222	0.288368
0.211733	0.0426815	0.155772
0.163313	0.0625139	0.647731
0.124985	0.258933	0.454149
0.162321	0.119285	0.529408
0.218344	0.13306	0.404981
0.23629	0.0978346	0.387758
0.114814	0.212884	0.239443
0.0360646	0.0735775	0.321293
0.0670913	0.424206	0.343799
0.0663544	0.446393	0.531848
0.0555094	0.327544	0.1875
0.153939	0.168492	0.232443
0.154278	0.0870614	0.360846
0	0.119693	0.290441
0.160724	0.191831	0.0456769
0	0.217885	0.115304
0	0.224486	0.434562
0.429099	0.339504	0.500149
0.16618	0.0943495	0.21087
0	0.382859	0.369813
0.0340926	0.46819	0.152166
0.047606	0.358695	0.4
0.251434	0.0981679	0.482803
0.0775362	0.608118	0.17792
0.357143	0.353603	0.506542
0.281465	0.104099	0.483739
	0.369231	0.527276
0.0947163	0.531627	0
0.075244	0.294368	0.163496
0.0419023	0.20363	0.0855318
0.129854	0.206192	0.625
0.0922118	0.198413	0.318301
0.330528	0.240058	0.231106
0.141754	0.0653079	0.46543
	0.160583	0.396257
0.0788514	0.0712361	0.377693
0.171178	0.159248	0.618875
0.389861	0.0741829	0.288648
0.0674433	0.216855	0.5027
0.0308415	0.350445	0.303471
0.0540316	0.295621	0.574124
0.227765	0.180224	0.383568
0.1574	0.313783	0.180503
0.473423	0.238249	0.393063
0.239673	0.0513484	0.181265
0.274624	0.0694564	0.103791
0	0.173276	0.317691
0	0.232544	0.277684
0.341599	0.077384	0.248698
0.240099	0.101191	0.65
0.0528452	0.199353	0.232233
0.0632437	0.361346	0.284013
0.146847	0.192799	0
0.207659	0.546642	0.383581
0.126785	0.167538	0.371337
0.106141	0.105268	0.251879
0.169126	0.257612	0.0825352
0.169329	0.361111	0.394074
0.166778	0.0590913	0.419375
0.189455	0.255793	0.625
0.410565	0.373025	0.312545
0.0657819	0.454013	0
0.19059	0.282694	0.206984
0.0269925	0.419375	0.148456
0.0670116	0.136051	0.290056
0.137595	0.213577	0.421269
0.411643	0.482745	0.215611
0.207668	0.206028	0.411658
0.0688503	0.381916	0.393336
0.0667298	0.177845	0.237318
0.135294	0.104956	0.28173
0.290995	0.419375	0.168456
0.18021	0.0752874	0.301487
0.123804	0.373025	0.344463
0.396467	0.454915	0.344924
0.11046	0.164148	0.452421
0.286629	0.478067	0.453623
0.540586	0.145298	0.286266
0	0.540872	0
0.130325	0.278328	0.158686
0.0453366	0.31681	0.393989
0.10584	0.166667	0.458641
0.419375	0.232233	0.40251
0.0870723	0.195229	0.322297
0.0816439	0.347326	0.270849
0.0348313	0.316479	0.0496904
0.0175525	0.211894	0.304754
0.0710905	0.20103	0.310358
0.0917319	0.353688	0.105777
0.0878228	0.495713	0.239583
0	0.0632748	0.384661
0.082524	0.309423	0.394951
0.239601	0.324581	0.585131
0.100844	0.356984	0.52206
0	0.328905	0.333176
0.0732325	0.46684	0.414922
0.154623	0.0289936	0.319211
0.0518966	0.320313	0.449751
0.0539103	0.449431	0.09155
0.0241995	0.269297	0.541667
0.0604198	0.433086	0.170533
0.0204004	0.35453	0.125302
0.0439498	0.232323	0.669058
0	0.147197	0.144365
0.200645	0.286937	0.363511
0.100206	0.287788	0.449128
0.107159	0	0.232233
0.0904142	0.261781	0.485265
0.078454	0.398644	0.398571
0.366389	0.183915	0.4
0.136138	0.286466	0.336016
0	0.228572	0.5
0.109139	0.232233	0.4
0.262422	0.072949	0.380783
0.137591	0.150167	0.428849
0.166688	0.0554825	0.232233
0.321429	0.10562	0.286747
0.0412826	0.144915	0.247895
0	0.126565	0.551339
0.0613213	0.121439	0.171677
0.523549	0.461334	0.128493
0.4375	0.257996	0.322632
0.165456	0.0375771	0.250051
0.0529377	0	0.193034
0.0634773	0.101751	0.191481
0.0968825	0.167161	0.404821
0	0.45203	0.433333
0.0898136	0.137358	0.361369
0.232233	0.113337	0.169886
0.0634296	0.255996	0.155068
0.1856	0.416377	0.343475
0.0758825	0.289317	0.40198
0.5	0.175066	0.274113
0.274327	0.165843	0.32053
0.299432	0.316124	0.248521
0	0.144365	0.13195
0.0512095	0.0454703	0.207659
0.199337	0.348878	0.516858
	0.157258	0
0.0692443	0.210817	0.273218
0.163949	0.018497	0.474012
0.354167	0.263718	0.389056
0.526414	0.30462	0.19165
0.229167	0.19822	0.357627
0.0354544	0.241581	0.0951576
0.215044	0.0970264	0.343742
0	0.0444141	0.318507
0.303506	0.0625755	0
0.103017	0.218234	0.370495
0	0.295589	0.179983
0.162513	0.218176	0.464648
0.256431	0.186286	0.396497
0.170195	0.20158	0.379918
0.0916149	0.129683	0.212133
0.07707	0.13777	0.365447
0.273923	0.370731	0.240351
0.369815	0.282777	0.406212
0.0763447	0.15059	0.399194
0.232233	0.230554	0.35314
0.421112	0.219327	0.0656867
0.0808252	0.399413	0.164702
0.102751	0.645126	0.295265
0.381447	0.207659	0.410809
0.0425266	0.572929	0.394583
0.0312091	0.377255	0.4
0.4	0.619368	0.502828
0.357604	0.390437	0.125878
0.550687	0.354384	0.414384
0.178617	0.0567778	0.163397
0.232233	0.0910553	0.46133
0.102405	0.150586	0.301721
0.411353	0.490869	0.363249
0.0631089	0.127773	0.293554
0.207268	0.394646	0.378209
0.5	0.0792889	0.35796
0.0424472	0.181997	0.317576
0.105578	0.461451	0.297998
0.153078	0.182838	0.441153
0	0.289269	0.541092
0.0783496	0.192475	0.365878
0.0312501	0.173575	0.285523
0.0904807	0.187566	0.5
0.186581	0.345807	0.625
0.290406	0.112323	0.38761
0.232233	0.179285	0.250689
0.0475709	0.418697	0.353603
0.18745	0.274168	0.49228
0.4	0.301245	0.232233
0.183915	0.14054	0.322942
0.19435	0.385124	0.225586
0.173102	0.0664605	0.294006
0.075096	0.282755	0
0.130715	0.137267	0.241246
0.144879	0.0248044	0.296493
0.0761201	0.437418	0.357259
0.194236	0.102081	0.603367
0.270083	0.300383	0.490472
0.0469273	0.452113	0
0.339331	0.130422	0.424829
0.351887	0.319099	0.367903
0.248152	0.102928	0.474171
0.343273	0.276771	0.456789
0.0400824	0.29516	0.262349
0.0834138	0.164641	0.465431
0	0.118918	0.329326
0.205571	0.443748	0.365092
0.299612	0.243233	0.488738
0.132135	0.369475	0.398782
0.345121	0.314125	0.4
	0.203159	0.513796
0.50395	0.183602	0.247321
0.389338	0.324189	0.330862
0.19456	0.137099	0.141022
0.0848242	0.207676	0.283135
0.244988	0.224314	0.376029
0.204607	0.151496	0.484454
0.0946258	0.358153	0.144087
0.155726	0.454276	0.30958
0.11223	0.625	0.304946
0.1304	0.172897	0.225499
	0.442708	0.199744
0.0592379	0.1875	0.173726
0.342761	0.460149	0.655747
0.264739	0.456945	0.438845
0.398071	0.395833	0.302294
0.21658	0.179417	0.44076
0.399029	0.171009	0.212452
0.453511	0.488872	0.546642
0.160209	0.470231	0.670001
0.0804339	0.331005	0.427497
0	0.0533966	0.138938
0.0835757	0.433301	0.493863
0.399542	0.444002	0.384732
0.0800457	0.476518	0.361111
0.446404	0.354571	0.421136
0.329054	0.36947	0.294169
0.036417	0.270478	0.574556
0.0855146	0.268575	0.371925
0.0882821	0.0966382	0.111452
0.049571	0.583333	0.198866
0.0740807	0.0934716	0.314815
0.143985	0.489237	0.385484
0.0605437	0.166771	0.425466
0.0323999	0.0698653	0.473629
0.361898	0	0.152396
0.444631	0.207215	0.355123
0.261949	0.222064	0.295826
0.105741	0.654071	0.454772
0.271199	0.273555	0.58825
0.232233	0.119115	0.244275
0.0549304	0	0.315012
0.286601	0.109177	0.321121
0.164325	0.271923	0.362165
0.12195	0.335545	0.3831
0.232385	0.488398	0.604954
0.288371	0.410546	0.480509
0.0646402	0.324154	0.601251
0.107608	0.53627	0.308665
0.0641013	0.460107	0
0.0656401	0.259229	0.584143
0.505778	0.583333	0.354757
0	0.365951	0.301419
0	0.331214	0.452418
0.0404561	0.071575	0.379407
0.346351	0.419375	0.277897
0.124326	0.279095	0
0.127642	0.532512	0
0.0839584	0.528084	0.479068
0.123753	0.10918	0.442093
0.130509	0.177431	0.398469
0.258009	0.50882	0
0.0467413	0.406797	0.1505
0.424064	0.396476	0.392857
0	0.266847	0.43614
0	0.118479	0.385703
0.194946	0.227715	0.381768
0.272128	0.32578	0.4
0.221446	0.0365232	0.356753
0	0.179773	0.252988
0.130488	0.233675	0.415082
0.111315	0.323608	0.207201
0.497247	0.133132	0.445548
0.486799	0.367711	0.43628
0.4125	0.541667	0.207659
0	0.277201	0.559446
0	0.528053	0.521901
0.413376	0.389078	0.219533
0.519145	0.338497	0.49101
0	0.124715	0.529217
0.329478	0.170744	0.454373
0.283303	0.689447	0.36758
0.192639	0.38611	0.442229
0.284572	0.101814	0.536577
0.410188	0.321256	0.362165
0.361111	0.546875	0.477797
0.123772	0.393347	0.20267
0	0.291934	0.427587
0.363209	0	0.38761
0.295953	0.245106	0.335425
0.4	0.479095	0.376344
0.232233	0.513415	0.366425
0.454071	0.365621	0.363842
0	0.193412	0.361914
0.329177	0.1875	0.322804
0.240962	0.211692	0.416325
0.333869	0.257139	0.267659
0.408706	0.270566	0.216783
0.0775328	0.475966	0.51976
0.135746	0.314841	0.292664
0	0.201055	0.136095
0.34009	0.311501	0.319048
0.244294	0	0.415162
0.150724	0.0568265	0.323051
0.0997832	0.32392	0.492127
0.297312	0.0208649	0.28285
0.169603	0.40736	0.1875
0	0.389037	0.269559
0	0.433772	0.322451
0.392857	0.183004	0.668537
0.3125	0.5089	0
0.310765	0.267493	0.492872
	0.148677	0.363877
	0.0691655	0.272697
0.0993766	0.037308	0.489519
0.311139	0.548241	0.465783
0.486214	0.0348451	0.49058
0.200001	0.491453	0.218432
0.0441852	0.0551316	0.471429
0	0.301245	0.12374
0.234566	0.404871	0.424854
	0.252774	0
0	0.146761	0.528846
0.0582012	0.159107	0.335677
0.224328	0.132812	0.415655
0.214265	0.19661	0.518755
0.0361416	0.18889	0.292881
0.207659	0.199959	0.268324
0.334172	0.135459	0.321429
0.383155	0.116587	0.27603
0.117744	0.171661	0.320818
0.536509	0.232233	0.351852
0.264827	0.0977199	0.366124
0.141907	0.133854	0.537993
0.0966334	0.572978	0.435333
0.342109	0.0566574	0.198866
0.114717	0.512426	0.420215
0.447177	0.500617	0.313838
0.14007	0.610007	0.278474
0.169043	0.274638	0.200001
0.219239	0.0929713	0.211329
0.126394	0.199537	0.330981
0	0.435106	0.378559
0.245818	0.218369	0.334177
0	0.210227	0.274338
0.279583	0.263309	0.278932
0.0753803	0.120204	0.0837705
0.0536283	0.195077	0.222285
0.0833333	0.40387	0.315012
0.0582271	0.0861275	0.669366
0.207659	0.49678	0.614293
0.413035	0.220912	0.332952
0.239601	0.195389	0.413679
0.115347	0.345222	0.423359
0	0.109459	0.301245
0.17701	0.0570236	0.42916
0.315478	0.540585	0.166667
	0.474001	0.375574
0.0932795	0.477778	0.398815
0.145526	0.237925	0.495451
0.0252049	0.560219	0.400343
0.189925	0.345849	0.306699
0.078337	0.53706	0.286647
0.0954947	0.324063	0
0	0.0861602	0.5
0.365972	0.161956	0.371961
0.0296433	0.205032	0.291871
0.0989016	0.199394	0.495738
0.0846383	0.262019	0.305493
0.166258	0.241728	0.346843
0.101736	0.106058	0.370321
0.111672	0.118204	0.242062
0.5	0.333632	0.427016
0.195811	0.176386	0.625
0.0802647	0.202769	0.51738
0.0498408	0.379045	0.492061
0.325026	0.205433	0
0.0725695	0.305897	0.368623
0.0583333	0.455596	0.327445
0.239601	0.396257	0.298849
0.0641763	0.188871	0.541667
0.0721014	0.0337104	0.397133
0.174537	0.45764	0.366807
0.06645	0.285359	0.369379
0	0.309845	0.491111
0.0931881	0.191475	0.418324
0.102245	0.069582	0.244175
0.198689	0.151258	0.136545
0	0.27245	0.44434
0.105301	0.392512	0.357995
0.0721964	0.275275	0.301245
0.0950822	0.063718	0.168821
0.0269519	0.0584831	0.305456
0.16946	0.248679	0.564322
0.0842891	0.124633	0
0.326226	0.266889	0.397826
0.380783	0.276184	0.430208
0.123897	0.468779	0.262338
0	0.58915	0.419603
0.0668991	0.22352	0.142103
0.287222	0.34926	0.261231
0.0999118	0.166116	0.072949
0.207712	0.285961	0.371742
0.112841	0.523351	0.135294
0.0764621	0.180992	0.313027
0	0.154122	0.31071
0.239446	0.550287	0.292714
0.131186	0.231043	0.488405
0.169245	0.291597	0.221297
0.0352278	0.119844	0.530715
0.245913	0.262076	0.290765
0.198512	0.339899	0.215487
0	0.472317	0.283875
0.1273	0	0.17397
0.228539	0.42817	0.411825
0.141364	0.410447	0.366802
0.198166	0.328191	0.224829
0.147487	0.310641	0.409508
0.165	0.366654	0.214389
0.227839	0.258562	0.291038
0.0161887	0.578261	0.226519
0.112955	0.526406	0.359177
0.0405404	0.668642	0.33231
0.234936	0.599696	0.356044
0.127561	0.147412	0.315821
0.289525	0.46824	0.278765
0.0873468	0.0897877	0.197737
0.0413255	0.556646	0.532769
0.313387	0.337348	0.292664
0.207659	0.45189	0.220398
0.133236	0.515582	0.385538
0.15348	0.483536	0.478677
0	0.504577	0.489859
0.133543	0.513527	0.302517
0.177047	0.355564	0.303526
0	0.539074	0.333122
0.0659975	0.505634	0.476654
0.207659	0.306108	0.497705
0.232233	0.384199	0.487279
0.217777	0.101013	0.377952
0.109748	0.320366	0.296279
0.232233	0.450302	0.284574
0.121212	0.318473	0.444607
0.0808406	0.274763	0.501712
0.0792318	0.188128	0.167215
0.0488581	0.424459	0.495912
0.110511	0.0767737	0.396394
0.166667	0.179224	0.317761
0.217485	0.299554	0.294957
0.1588	0.241143	0.436324
0.367979	0.0830831	0.179556
0.5	0.317965	0.470791
0.325952	0.450107	0.45298
0	0.254238	0.545814
0	0.335988	0.145753
0.488564	0.309023	0.321429
0.20968	0.381243	0.502214
0.232233	0.253133	0.0983537
0.347712	0.33056	0.184787
0.0833333	0.100096	0.43395
0	0.310135	0.526333
0	0	0.191258
0.250654	0.135981	0.270833
0.232233	0.0380232	0.318882
0	0.160236	0.381768
0.232233	0.0542064	0.285682
0	0.32128	0.233707
0	0.0351086	0.0932655
0.108193	0.217992	0.2999
0.309731	0.164871	0.233853
0	0.117591	0.53153
0.464002	0.375321	0.538555
0.119844	0.172645	0.401146
0.522073	0.305598	0
0.283163	0.310564	0.583507
0	0.387471	0.303098
0	0.304445	0.180422
0	0.4	0.323405
0.228095	0.0342042	0.419375
0	0.250617	0.270982
0	0.35651	0.517747
0	0.326717	0
0	0.384363	0.16688
0.155772	0.0567182	0.161876
0.291496	0	0
0.14261	0.274076	0.479062
0.095456	0.47852	0.562662
0.237351	0.444858	0.56259
0.178827	0.285379	0.424635
0.428327	0.105489	0.198866
0	0.125081	0.258354
0.122528	0.290828	0.279365
	0.481948	0.110761
0.474912	0.0568321	0.19465
0.353603	0.153989	0.279583
0.155772	0.174243	0.346995
	0.0645562	0.490385
0	0.166084	0.232233
0	0.602307	0.313274
0.174317	0.139219	0.430707
0.1875	0	0.255026
0.230835	0.391454	0.427513
0.148096	0.20049	0.38937
0.272848	0.30179	0.343137
0.298212	0.234914	0.392485
0.239601	0.48943	0.385505
0.300247	0.489822	0.196253
0.295751	0.423001	0.369095
0	0.288622	0.303107
0.188265	0.287269	0.284027
0.198849	0.244103	0.329258
0.536845	0.397691	0.258991
0.413035	0.152838	0.59375
0.440729	0.0793586	0.456486
0.194493	0.149241	0.437931
0.39491	0.0880642	0.131186
0.187323	0.304915	0.372975
0.119376	0.26435	0.386068
0	0.280276	0.384825
0.152396	0	0.208179
0.4095	0.174548	0.332706
0.4	0.569683	0.183349
0.173327	0.19297	0.582063
0.219453	0.221469	0.388525
0.196286	0.451142	0.581985
0.218539	0.218079	0.259595
0.0679312	0.433464	0.268058
	0.315109	0.428913
0.244338	0.246922	0.416324
0.0677712	0.230124	0.38314
0.322782	0	0.453153
0	0.0891728	0.401518
0.296426	0.112813	0.441976
0.214048	0.214942	0.503097
0.248976	0.193513	0.292504
0.0365919	0.325827	0.400671
0.222397	0.335891	0.30484
0.157072	0.52366	0.501246
0.263486	0.335771	0.262885
0.0491736	0.27999	0.269697
0.199713	0.177237	0.4955
0.0992908	0.330156	0.208794
0.0607867	0.451042	0.305
0.222942	0.372139	0.408868
0.107304	0.479377	0.221862
0.160893	0.541667	0.541667
0.103079	0.113463	0.401146
0.46059	0.381746	0.124628
0.199125	0.178265	0
0.203913	0.481169	0.343423
0.476741	0.184241	0.452753
0.173199	0.426064	0.300352
0.232233	0.265576	0.310834
0.131169	0	0.370288
0.155747	0.0938646	0.209929
0.044247	0.389553	0.367431
0.167565	0.202237	0.194564
0.12622	0.440143	0.330403
0.23983	0.564722	0.412828
0.231059	0.115398	0.409181
0.163831	0.0855137	0.095479
0	0.420584	0.342705
	0.19711	0.247859
0.113716	0.0780547	0.343631
0.115846	0.504613	0.378547
0.355973	0.344501	0.237262
0.190578	0.525725	0.262533
0.312583	0.369062	0.279503
0.048733	0.191867	0.348027
0	0.315072	0.361678
	0.128387	0.473102
0.134211	0.185166	0.545472
0.185306	0.560524	0.356411
0.232233	0.289679	0.461485
0.226116	0.151206	0.473251
0.317094	0.197697	0.358366
0.138912	0.287174	0.412728
0.151153	0.515716	0.456007
0.184377	0.219965	0.431155
0.29363	0.405161	0.565387
0	0.330725	0.48533
0.0469254	0.361111	0.463354
0.167949	0.148439	0.26079
0.462581	0.255721	0.331658
	0.236484	0.263694
0.432522	0.211597	0.453397
0.207659	0.167435	0.450059
0.141589	0.219872	0.167998
0.281385	0.388889	0.482959
0.152516	0.298964	0.299675
0.15839	0.121003	0.357996
0.130519	0.166483	0.444776
0.348162	0.29083	0.190369
0.493915	0.538137	0
0.124007	0.187146	0.46818
0.5	0	0.302622
0.0913569	0.180095	0.151465
0.185582	0.299697	0.541667
0	0.350734	0.427306
0.26874	0.0648101	0.475617
0.299272	0.337717	0.174592
0.0289871	0.20513	0.350349
0.187289	0.305689	0.387904
0	0.125908	0.310411
0.0663465	0.321429	0.58067
0.026469	0.345169	0.711638
0.0543059	0.149666	0.232233
0.29843	0.400964	0.437083
0.290811	0.415912	0.220897
0.107212	0.307861	0.569535
0.0759433	0.547728	0.137721
0.382229	0.0776477	0.459242
0.066552	0.534738	0.550551
	0.172455	0.072949
0.184003	0.581671	0.401146
0.0879683	0	0.0910972
0.141645	0.640838	0.368838
0.0584854	0.232233	0.373859
0.310333	0.396375	0.482412
0.0742795	0.559805	0.311119
0.0833333	0.403404	0.419375
0.102239	0.305291	0.323707
0.312217	0.586891	0.322419
0.0982492	0.165024	0.402891
0	0.459156	0.679203
0.354981	0.104527	0.208694
0.281916	0.236266	0.44489
0.146142	0.311827	0.350476
0.356893	0.181772	0.149651
0	0.200551	0.438376
0.214286	0.186082	0.200241
0.222444	0.208891	0.389037
0.148662	0.321429	0.460208
0.128773	0.1875	0.306951
0.0679996	0.549784	0.412438
0.0833333	0.607143	0.249003
0.172185	0.477336	0.153888
0.152339	0.126319	0.17655
0.307861	0.455227	0
0.5	0.22092	0.382641
0.506468	0.457319	0.509261
0.21991	0.330324	0
	0.216394	0.434782
0.366259	0.542579	0.434604
0.266383	0.399627	0.232233
0.23324	0.1504	0.597598
0.0869731	0.436719	0.708333
0.284102	0.279583	0.477229
0.218469	0.298046	0.337621
0.046564	0.0573609	0.785714
0.240907	0.483026	0.338758
0.139144	0.411304	0.354236
0.419375	0.336848	0.328478
0	0.332045	0.517448
0.390363	0.314375	0.315032
0.0985946	0.251304	0.208631
0.485011	0.505051	0.547637
0.194245	0.286174	0.202304
0.0163497	0.307861	0.322152
0.166556	0.483319	0.411778
0.265708	0.370949	0.203226
0.233969	0.287959	0.593331
0.118856	0.495433	0.47652
0.339183	0.278659	0.142015
0.114038	0.462167	0.211725
0.331462	0.268776	0.366567
0	0.0596363	0.48478
0.0674799	0.147168	0.42604
0.189088	0.259612	0.366328
0.17405	0.1875	0.332007
0	0.240965	0.4
	0.0681142	0.489781
0.0614372	0.423929	0.428365
0.203005	0.170201	0.411515
0.323959	0.19204	0.446811
0.191804	0.151986	0.483606
0.228512	0.195581	0.361111
0.405406	0.178341	0.33962
0	0.448449	0
0.256047	0.2203	0.4
0.114534	0.423632	0.072949
0.100637	0.323516	0.232233
0.0691905	0.353022	0.567985
0.515326	0.513632	0.546504
0.310438	0.0966682	0.487163
0.29927	0.269005	0.232233
0.115012	0.332965	0.166667
0.243097	0.142624	0.541961
0	0.289716	0.287621
0.13905	0.278151	0.625
0.0883809	0.521016	0.266628
0.0770653	0.527814	0.450051
0.115885	0	0.0851275
0.1875	0.367337	0.188534
0.232233	0.139017	0.454093
0	0.359517	0.434444
0.18964	0.261957	0.432512
0.324786	0.509674	0.405477
0.232233	0.475176	0.20033
0.148289	0.380667	0.381139
0.439651	0.217278	0.529742
0.192392	0.445848	0.625
0.221292	0.419375	0.2816
0.199223	0.442578	0.284055
0.072949	0.583333	0.146995
0.348751	0.483268	0.425723
0.221307	0.399476	0.35
0.201114	0.189975	0.494275
0.239601	0.478401	0.558595
0.220207	0.399364	0.497263
0.232233	0.550183	0.47193
0.214721	0.502982	0.211551
0.1875	0.384148	0
0.255327	0.599556	0.207659
0.232233	0.288548	0.227273
0	0.192295	0.318781
0.185359	0.785714	0.499832
0.142979	0.252916	0.306369
0.30043	0.58054	0.211695
0	0.537677	0.266316
0.134386	0.28458	0.157783
0.28868	0.433252	0.528449
0.0579938	0.785714	0
0.530807	0.176021	0.393767
0.225297	0.232233	0.19422
0.293135	0.232233	0.486646
0.394514	0.232233	0.313576
0.296584	0.343418	0.459874
0.220729	0.588466	0.258088
0.107116	0	0.406804
0.0924092	0.590176	0.270936
0.1875	0.12395	0.152061
0.114712	0.606489	0.428883
0	0.363179	0.512383
0.325518	0.398728	0.356715
0.136447	0.183636	0.388326
0.415635	0.392768	0.524301
0.102405	0.535714	0.476518
0.254857	0.331098	0.303205
0	0.361399	0.47975
0.146359	0.212469	0.313328
0.221399	0.451776	0.131389
0.135437	0.327852	0.5
0.294487	0.419375	0.487135
0.291193	0.460725	0.487013
0.135361	0.419375	0.487157
0.225504	0.239601	0
0	0.380776	0.224935
0.239601	0.625	0.29677
0.232233	0.361837	0.265495
0.0953181	0.0905232	0
0.474383	0.36026	0.301099
0.328024	0.329412	0
0.261698	0.429962	0.625
0.192687	0.107515	0.166667
0.222005	0.198866	0.511795
0.404558	0.19563	0.298113
0.494308	0.177477	0.137082
0.198866	0.224231	0
0.0363894	0.126614	0.516084
0	0.296028	0.123866
0.166278	0.0634862	0.297051
0.20722	0.158932	0.462674
0.0999097	0.373457	0.520049
0.0770653	0.114521	0
0.0829767	0.119875	0.469311
0.271226	0.239286	0.199186
0.232233	0.298762	0.4
0.187748	0	0.383905
0.229236	0.34747	0.44411
0.293599	0.0770342	0.45
0.192022	0.440411	0.625
0.280917	0.116746	0.245583
0.0477395	0.00734937	0.264651
0.438631	0.598284	0.385734
0.190957	0.0501778	0.1151
0.264669	0.256991	0.544751
0.134432	0.361111	0.506799
0.149046	0.328571	0.242296
0.17708	0.0699998	0.569637
0.454896	0.173929	0.490192
0.0456405	0.443472	0.50738
0.194638	0.23413	0.461048
0.305221	0.25518	0.257277
0.473963	0.454273	0.417877
0.226541	0.23885	0.315012
0.248627	0.378547	0.514706
0.185601	0.392857	0.5
0.361111	0.090733	0.442106
0.0732591	0.322436	0.184793
0.126144	0.168565	0.469956
0.0435692	0.0860277	0.502214
0.171944	0.186752	0.421915
0.417096	0.0831019	0.526873
0.107681	0.146995	0.385686
0.0556165	0.413041	0.418733
0.0476171	0.08333	0.497328
0.452443	0.232233	0.23347
0.169577	0.0544667	0.345159
0.173009	0.384247	0.220078
0.239601	0.222076	0.608808
0.327385	0.215365	0.232233
0	0.29744	0.875
0.109446	0.478367	0.170893
0.282838	0.119844	0.239601
0.151847	0.296284	0.131562
0.3354	0.19926	0.436929
0.125502	0.111455	0.451456
0.188703	0.166173	0.476686
0.346586	0.344679	0.38367
0.390253	0.428327	0.238436
0.209487	0.522222	0.60177
0.239601	0.279583	0.247434
0.296617	0.502487	0.220897
0.139612	0.0444058	0.256765
0.0280318	0.267756	0.550357
0.0896658	0.13	0.321429
0.137119	0.194644	0.50113
0.159093	0.14241	0.381046
0.26424	0.0542508	0.259467
0.218882	0.229571	0.47794
0.25234	0.402707	0.227
0.0262899	0.184414	0.127198
0	0.625	0.232233
0.155772	0.233545	0.129405
0.0764698	0.18529	0.493295
0.32052	0.33727	0.3144
0.317854	0.086079	0.343684
0.162892	0.451628	0.587549
0.0680926	0.0557572	0.411359
0.0972222	0.526448	0.372474
0.0438611	0.0740424	0.372606
0.0540591	0.297145	0.59375
0.0693456	0.290214	0.192155
0.236812	0.125938	0.311139
0.189121	0	0.29208
0.197789	0.174293	0.155772
0.117332	0.305816	0.232233
0.1505	0.181257	0.369416
0.0955372	0.163115	0.564218
0.0624869	0.474386	0.355163
0.400856	0.298105	0.414124
0	0.536577	0.27724
0.23386	0.0737492	0.237263
0.515708	0.339948	0.310032
0.207204	0.463999	0.573615
0.120483	0.272144	0.378129
0.300616	0.143974	0.355687
0.22627	0.498776	0.321856
0.4	0.175453	0.591077
0.451679	0.171947	0.419375
0.166667	0.0992388	0.517758
0.0906297	0.229985	0.228401
0	0.232781	0.132338
0.232233	0.269595	0
0.0157485	0.251501	0.476518
0.201595	0.498855	0.123868
0.243562	0.400602	0.215473
0.11822	0.357421	0.323959
0.1421	0.0667437	0.235647
0.157865	0.128979	0
0.4	0.304076	0.124452
0.19542	0.22505	0.361111
0.115474	0.193448	0.169072
0.233071	0.419375	0.252992
0	0.213705	0.625
0.111237	0.469549	0.534323
0.0823676	0.481242	0.200912
0.0345036	0.239523	0.138912
0.343814	0.4	0.256646
0.354777	0.625	0.625
0	0	0.204155
0.243204	0.102817	0.163272
0.0848151	0	0.62786
0.0998939	0.111937	0.281176
0.305802	0.169076	0.279997
0.0510229	0.0515008	0.362603
0.0723428	0.286493	0.161198
0.249729	0.0845368	0.522744
0.302912	0.164462	0.391003
0.299362	0.625	0.280344
0.314124	0.0339018	0.561119
0.189367	0.125882	0.3097
0.0307687	0.194048	0.346123
0.1875	0.175686	0.349175
0	0.0984726	0.335677
0.0833333	0.395458	0.408916
0.0912834	0.681262	0.263286
0.0927548	0.293161	0.428571
0.15181	0.341584	0.525376
0.0666495	0.0782304	0.291928
0.183361	0.254616	0.502531
0.12638	0.577284	0.226703
0.171513	0.281722	0.53219
0.185141	0.227182	0.416527
0.099976	0.392834	0.218344
0.0620204	0.322377	0.254109
0.0940072	0.501319	0.317893
0.321029	0.289262	0
0.222388	0.217052	0.593416
0.298536	0.212856	0.280341
0.283979	0.225604	0.439656
0	0.274635	0.408492
0.0901395	0.440814	0.263588
0.421707	0.327852	0.46042
0.0634433	0.10882	0.381399
0.0616533	0.110868	0.361172
0.0997249	0.178433	0.212303
0.0360799	0.37561	0.312077
0.0833508	0.479511	0.349074
0.0465323	0.119299	0.448551
0.0967022	0.309096	0.432913
0.4	0.247812	0.300815
0.0613377	0.328452	0.357656
	0.473303	0.445564
0	0.0830861	0.487135
0.0244482	0.361111	0.638889
0.475291	0	0.382167
0.270664	0.17962	0.392729
0.0544649	0.268526	0.0802072
0.375769	0.252785	0.31571
0.0720045	0.526015	0.655747
0.133001	0.446197	0.504778
0.0883516	0	0
0.225062	0.230648	0.488612
0	0.0985515	0.280501
0.29863	0.327841	0.42565
0.207659	0.0463304	0.159
0.165747	0.658734	0.32025
0	0.0875091	0.425451
0	0.562581	0.484047
0.0253732	0.262714	0.422063
0.149045	0.135185	0.325126
0.181489	0.299432	0.220897
0.194215	0.109276	0.269936
0.433117	0.328726	0.250121
0.0394946	0.301245	0.287606
0.0833333	0.170292	0.639631
0.246659	0.276478	0.640055
0.0557522	0.330694	0
0.0439758	0.630957	0.297221
0	0.0720956	0.511021
0.220897	0.155772	0.194867
0.0226768	0.124784	0.349938
0.234452	0.351392	0.359955
0.0757086	0.456753	0.470609
0.131154	0.148075	0.313801
0.172227	0.403801	0.482557
0.232233	0.365479	0.612772
0.0578995	0.5	0.266437
0.143554	0.17571	0.415843
0.156912	0.114301	0.477778
0.16476	0.091764	0
0.232233	0.57162	0.110023
0	0.302709	0.348678
0.0935948	0.165226	0.354624
0.104519	0.180876	0.22377
0.152525	0.232233	0.475
0.0590466	0.0729162	0.351277
0.4	0.405534	0.400281
0.419375	0.347018	0.65
0.0225107	0.130401	0.254843
0.297915	0.110778	0.306406
0.082785	0.150114	0.241461
0.0553169	0.163346	0.465259
0	0.496316	0.445198
0.172465	0.257074	0.584603
0.192755	0.400426	0.345237
0.130813	0.35438	0.346138
0.14221	0.377587	0.269426
0.0606556	0.0448127	0.287217
0.0994557	0.159687	0.335992
0	0.283999	0.377117
0.110296	0.520272	0.498305
0.0706147	0.306343	0.37259
0.0445133	0.20437	0.347196
0.480227	0.192336	0.418809
0.0629544	0.377417	0.378651
0.277305	0.0640903	0.427957
0.422058	0.363147	0.204171
0.0438479	0.334885	0.5144
0.436582	0.278758	0.106798
0.209219	0.298078	0.307861
0.269794	0.345442	0.30636
0.191012	0.649227	0.446672
0.0514872	0.0840207	0.49344
0.072949	0.285714	0.369062
0.162199	0.561924	0.446429
0.246654	0.267835	0.49572
0	0.204435	0.526048
0	0.0696996	0.238421
0.153427	0.333302	0.35847
0.277382	0.0839514	0.410581
0.072949	0.404967	0.211968
0.154557	0.116313	0.447395
0.176437	0.285	0.260496
0.139643	0.102197	0.340801
0.180913	0.291971	0.363113
0.0877413	0.203021	0.407969
0.120849	0.192789	0.528406
0.20388	0.10596	0.534866
0.345864	0.0970738	0.598284
0.406789	0.264354	0.461451
0	0.38273	0.232233
0.232233	0.0791636	0.493479
0	0.305381	0.487886
0.203875	0.232233	0.419375
0.0702853	0.0721275	0.590241
0	0.0507032	0.785714
	0.681262	0.072949
0.143527	0.514894	0.357905
0.110169	0.30927	0.2189
0.20056	0.370543	0.208128
0.222104	0.382341	0.442214
0.223323	0.177633
0.0639379	0.374415
0.0953707	0.12791
0.0691533	0.210015
0.188121	0.5
0.208379	0.0893276
0.0602981	0.408304
0.165354	0.205739
0.0545549	0.0603475
0.0577673	0.408102
0.0909712	0.173895
0.0823021	0.360272
0.218865	0.471321
0.264112	0.262419
0	0.503335
0.0344094	0.191019
0	0.345792
0.143483	0.184036
0.267052	0.31204
0.054795	0.253501
0	0.413746
0.281205	0.419375
0	0.148997
0.351459	0.17397
0.112365	0
0.321281	0.476518
0.0398109	0
0	0.174923
0	0.0482447
0	0.044248
0.156202	0.265666
0.0210643	0.115809
0.157792	0.232233
0.232233	0.557808
0	0.16932
0.096337	0.211329
0.476518	0.134343
0.113826	0.318629
0.232233	0.196668
0.542432	0.562662
0.170814	0.134315
	0.359445
	0.631559
0	0.400379
0	0.191892
0.0855521	0.254915
0.36977	0.123526
0	0.350927
0.0833333	0.278315
0.0962415	0.0907059
0.458492	0
0.0217792	0.35768
0.0378761	0.398075
0	0.36459
0.232233	0
0.231603	0.467391
0	0.134446
0.188171	0.0403545
0	0.312742
0	0.301707
0.122512	0.305116
0.283979	0.321461
0.450116	0.177087
0.430801	0.399592
0	0.295893
0.42263	0.36234
0	0.355443
0	0.176102
0	0.396366
0.133598	0.36722
0.332481	0.343004
0	0.0579674
0.324087	0.241594
0	0.233295
0.0833333	0.0822523
	0.326385
0	0.384663
0	0.354532
0	0.307565
0.232233	0.625
0	0.541361
0	0.19563
0.195736	0.0682671
0.288178	0.445279
0.0613498	0.149823
0.0744702	0.377115
0	0.502828
0.125553	0.265535
0.152167	0.0934229
0.325831	0.536577
0.194336	0.5
0	0.232233
0.209042	0.396204
0.207659	0
0.191613	0.211609
0.317914	0.319291
0.289381	0.27886
0.093653	0.321541
0.0820626	0.164846
	0.394391
0.101216	0.278529
0.0865589	0.28517
0.0828241	0.271429
0.0894031	0.199536
0.0880486	0.0631824
0.0377578	0.625
0.224598	0.350956
0.229618	0.283665
0.0508275	0.0684184
0.0740315	0.408293
0.337963	0.395619
0.0678709	0.291525
0.315913	0.122204
0.192149	0.410431
0.361111	0.0933603
0.143059	0.198597
0.0777207	0.0635433
0.356368	0.625
0.088995	0.362483
0.0762763	0.262411
0.0586464	0.486717
0.17224	0.419375
0.258756	0.408975
0.239601	0
0.104992	0.139512
0.330996	0.213567
0.232233	0.39882
0.316579	0
0.0846019	0.263847
0.0485903	0.403178
0.262338	0.138241
0.053587	0.431765
0.0829108	0.367139
0.15436	0.208442
0.12095	0
	0.453384
0.0795581	0.293319
0.027226	0.262972
0.159896	0.104087
0.0649485	0.0694317
0.314644	0.0659551
0.0106041	0.299188
0.433392	0.232233
0.191546	0.430208
0.0568652	0.1505
0.0398393	0.390186
0.30204	0.307036
0.0720858	0.302477
0.100232	0.331658
0.0740606	0.423033
0.117102	0.228062
0.0790415	0.397597
0.0423355	0.167835
0.0426153	0.373074
0.222432	0.0900238
0.291887	0.167079
0	0.0750012
0.155772	0.197006
0.322222	0.297277
0.378554	0.0822837
0.0601708	0.102829
0.135683	0
0	0.200153
0.176728	0.379902
0.0854709	0.215879
0.0427853	0.187008
0.4	0.0414612
0.106038	0.23911
0.13869	0.367299
0.0903246	0.0233176
0.166404	0.386365
0.0353441	0.180898
0.228377	0.252706
0.376543	0.24962
0.0430733	0.261491
0.0291152	0.255096
0.273072	0.274777
0.213404	0.244517
0.46798	0.466469
0.319291	0.249583
0.373898	0.481055
0.0882758	0.3679
0.06342	0.256633
0.168438	0.237714
0.197736	0.124143
0.4	0.320756
0.0193928	0.395833
0.0338463	0.497336
0.238581	0.166701
	0.374914
0.51595	0.232233
0.217897	0.143155
0.19465	0.242997
0	0.27569
0.1875	0.191999
0.0530353	0.181919
0.238915	0.619349
0.105195	0.343794
0.115929	0.369886
0.537747	0.120547
0.0439062	0.561936
0.0519723	0.381091
0.104438	0.326606
0.0830097	0.232233
0.201418	0.420164
0.066218	0.16137
0.118897	0.283844
0.41091	0.196596
0.124128	0.471189
0.265382	0.115459
0.0600074	0.216007
0.413035	0.268521
0.0612311	0.437404
0.0959599	0.219448
0.352217	0.100625
0.0289079	0.157029
0.111773	0.161307
0.130104	0.461858
0.271698	0
0.036513	0.163684
0.122838	0.481113
0.0475141	0.34943
0	0.0566288
0.0598885	0.163965
0.147361	0.103778
0.0946425	0.34574
0.0454639	0.108128
0.103547	0.465136
0.108112	0.375972
0.140533	0.300034
0.0932555	0.301245
0	0.381243
0.166215	0.338008
0.306323	0.303368
0	0.329743
0.17869	0.295021
0.5	0.0823506
0.0944712	0.174579
0.196814	0.277299
0.171664	0.508547
0.158556	0.121381
0.31909	0.319556
0.0722339	0.13336
0	0.373311
0.218614	0.0832711
0.207659	0.60136
0.361157	0.117583
0.146922	0.239583
0.0813798	0.35487
0.12693	0.0335413
0.238796	0.141589
0.365127
0.0678753
0.11031
0.0628016
0.210566
0.0238372
0.0327592
0.274255
0.148545
0.266999
0.0380345
0.309778
0
0.0382867
0.0883806
0.419375
0.427894
0.274147
0.0278463
0
0.400834
0.267413
0.266868
0.195325
0.0505406
0.0482689
0.13979
0.299757
0.381916
0.0569195
0.0900149
0.0670769
0.0366788
0.0728697
0.0458142
0
0
0.288944
0.223768
0.122146
0.0521864
0.0210103
0.0899195
0.216337
0.0707644
0.307861
0.0386296
0.13281
0.220009
0.0312125
0.212008
0.143772
0

## Sheet: Cumulative distribution
Value	P42 WT	P42 KI	P42 KO
0	164
0.0106041	165
0.0106991	166
0.0143137	167
0.0157485	168
0.0161887	169
0.0163497	170
0.0175525	171
0.0193928	172
0.0204004	173
0.0210103	174
0.0210643	175
0.0212945	176
0.0217679	177
0.0217792	178
0.0219818	179
0.0225107	180
0.0226768	181
0.022947	182
0.0231726	183
0.0238372	184
0.0241995	185
0.0244482	186
0.0251634	187
0.0252049	188
0.025317	189
0.0253732	190
0.0260343	191
0.0260355	192
0.0262899	193
0.026469	194
0.0269519	195
0.0269925	196
0.027226	197
0.0275415	198
0.0277991	199
0.0278463	200
0.0280318	201
0.0289079	202
0.0289871	203
0.0291152	204
0.0295242	205
0.0295783	206
0.0296433	207
0.0305132	208
0.0305522	209
0.0307687	210
0.0308415	211
0.0312091	212
0.0312125	213
0.0312501	214
0.0319941	215
0.0323999	216
0.0324172	217
0.0326791	218
0.0327592	219
0.0336733	220
0.0338463	221
0.0340926	222
0.0344094	223
0.0345036	224
0.0348313	225
0.0348501	226
0.0352278	227
0.0353441	228
0.0354338	229
0.0354544	230
0.0360646	231
0.0360799	232
0.0361416	233
0.0363894	234
0.036417	235
0.036513	236
0.0365919	237
0.0366788	238
0.0372882	239
0.0377578	240
0.0378761	241
0.0380345	242
0.0381408	243
0.0382867	244
0.0386296	245
0.0386919	246
0.039475	247
0.0394946	248
0.0398109	249
0.0398393	250
0.0400824	251
0.0404561	253
0.0405404	254
0.0406281	255
0.0409868	256
0.0410075	257
0.0412826	258
0.0413255	259
0.0414933	260
0.0419023	261
0.0422811	262
0.0423355	263
0.042424	264
0.0424472	265
0.0425266	266
0.0426153	267
0.0427853	268
0.042788	269
0.042844	270
0.0430733	271
0.0432256	272
0.0435692	273
0.0437728	274
0.0438479	275
0.0438611	276
0.0439062	277
0.0439498	278
0.0439758	279
0.0440957	280
0.0441852	281
0.044247	282
0.0442673	283
0.0445133	284
0.0448609	285
0.0453366	286
0.0454639	287
0.0455309	288
0.0456405	289
0.0458142	290
0.0464432	291
0.0465323	292
0.046564	293
0.0467413	294
0.0469254	295
0.0469273	296
0.0474419	297
0.0475141	298
0.0475709	299
0.047606	300
0.0476171	301
0.0477395	302
0.0482689	303
0.0485903	304
0.0486323	305
0.048733	306
0.0488581	307
0.0491736	308
0.049571	309
0.0496154	310
0.0498408	311
0.0498721	312
0.050017	313
0.0504132	314
0.0505406	315
0.0507842	316
0.0508275	317
0.0508756	318
0.0510229	319
0.0512095	320
0.0514872	321
0.0518381	322
0.0518966	323
0.0519723	324
0.0521864	325
0.0527443	326
0.0528452	327
0.0529377	328
0.052942	329
0.0530353	330
0.0531235	331
0.053587	332
0.0536283	333
0.0537488	334
0.0539103	335
0.0540316	336
0.0540591	337
0.0543059	338
0.0544649	339
0.0545549	340
0.054795	341
0.0549304	342
0.0550899	343
0.0553169	344
0.0555094	345
0.0556165	346
0.0557522	347
0.0559515	348
0.0566735	349
0.0568652	350
0.0569195	351
0.0577673	352
0.0578995	353
0.0579938	354
0.0582012	355
0.0582271	356
0.0583333	357
0.0584436	358
0.0584854	359
0.0586464	360
0.0590466	361
0.0592379	362
0.0598885	363
0.0600074	364
0.06004	365
0.0601708	366
0.0602981	367
0.0604198	368
0.0605437	369
0.0606556	370
0.0607867	371
0.0612311	372
0.0613213	373
0.0613377	374
0.0613498	375
0.0614128	376
0.0614372	377
0.0616533	378
0.0620204	379
0.0620919	380
0.0624869	381
0.0628016	382
0.0629438	383
0.0629544	384
0.0630645	385
0.0631089	386
0.0632437	387
0.06342	388
0.0634296	389
0.0634433	390
0.0634773	391
0.0637595	392
0.063824	393
0.0639379	394
0.0639907	395
0.0640785	396
0.0641013	397
0.0641763	398
0.0646402	399
0.0649485	400
0.0651919	401
0.0652309	402
0.0656401	403
0.0657819	404
0.0658594	405
0.0659975	406
0.0661845	407
0.066218	408
0.0663465	409
0.0663544	410
0.06645	411
0.066552	412
0.0666495	413
0.0666658	414
0.0667298	415
0.0667477	416
0.0667678	417
0.0668991	418
0.0670116	419
0.0670769	420
0.0670913	421
0.0674433	422
0.0674799	423
0.0677712	424
0.0678709	425
0.0678753	426
0.0679312	427
0.0679996	428
0.0680203	429
0.0680926	430
0.0681261	431
0.0685808	432
0.0686758	433
0.0688503	434
0.0691533	435
0.0691905	436
0.0692443	437
0.0693456	438
0.0702853	439
0.0703222	440
0.0706147	441
0.0707644	442
0.0710905	443
0.0712002	444
0.0714594	445
0.0720045	446
0.0720858	447
0.0721014	448
0.0721964	449
0.0722339	450
0.0723428	451
0.0725695	452
0.0728697	453
0.072949	456
0.073231	457
0.0732325	458
0.0732591	459
0.0733828	460
0.0740248	461
0.0740315	462
0.0740606	463
0.0740807	464
0.0742795	465
0.0744702	466
0.075096	467
0.0751252	468
0.075244	469
0.0753803	470
0.0754705	471
0.0757086	472
0.0758825	473
0.0759433	474
0.0761201	475
0.0761581	476
0.0762763	477
0.0763447	478
0.0764422	479
0.0764621	480
0.0764698	481
0.0766972	482
0.0770653	484
0.07707	485
0.0771817	486
0.0775322	487
0.0775328	488
0.0775362	489
0.077563	490
0.0777207	491
0.078337	492
0.0783496	493
0.0783926	494
0.078454	495
0.0788514	496
0.0790415	497
0.0792318	498
0.0795581	499
0.0800457	500
0.0802647	501
0.0804339	502
0.0808252	503
0.0808406	504
0.0813798	505
0.0816439	506
0.0817053	507
0.0820626	508
0.0822199	509
0.0822681	510
0.0823021	511
0.0823676	512
0.082524	513
0.082785	514
0.0828241	515
0.0829108	516
0.0829767	517
0.0830097	518
0.0833333	528
0.0833508	529
0.0834138	530
0.0835757	531
0.0839584	532
0.0842891	533
0.084416	534
0.0846019	535
0.0846383	536
0.0848151	537
0.0848242	538
0.0854709	539
0.0855146	540
0.0855521	541
0.0862407	542
0.0865589	543
0.0869731	544
0.0870723	545
0.0873468	546
0.0877413	547
0.0878228	548
0.0879683	549
0.0880486	550
0.0882758	551
0.0882821	552
0.0883516	553
0.0883806	554
0.0883809	555
0.088995	556
0.0890868	557
0.0894031	558
0.0895457	559
0.0896658	560
0.0898136	561
0.0898764	562
0.0899195	563
0.0900149	564
0.0901272	565
0.0901395	566
0.0903238	567
0.0903246	568
0.0904142	569
0.0904807	570
0.0905054	571
0.0905397	572
0.090602	573
0.0906297	574
0.0909712	575
0.0912834	576
0.0913569	577
0.0916149	578
0.0917319	579
0.0922118	580
0.0924092	581
0.0924134	582
0.0924444	583
0.092703	584
0.0927548	585
0.0931881	586
0.0932555	587
0.0932795	588
0.0935948	589
0.093653	590
0.0940072	591
0.0944712	592
0.0946258	593
0.0946425	594
0.0947163	595
0.0950822	596
0.0953181	597
0.0953707	598
0.095456	599
0.0954947	600
0.0955372	601
0.0956157	602
0.0958444	603
0.0958504	604
0.0959599	605
0.0962415	606
0.096337	607
0.0966334	608
0.0967022	609
0.0968825	610
0.0972222	611
0.097505	612
0.0977264	613
0.0982492	614
0.0985946	615
0.0989016	616
0.0992908	617
0.0993167	618
0.0993766	619
0.0994557	620
0.0997249	621
0.0997832	622
0.0998535	623
0.0998939	624
0.0999097	625
0.0999118	626
0.099976	627
0.100083	628
0.100206	629
0.100232	630
0.100301	631
0.100637	632
0.100844	633
0.100966	634
0.101216	635
0.101736	636
0.102239	637
0.102245	638
0.102405	640
0.102751	641
0.103017	642
0.103079	643
0.103452	644
0.103547	645
0.103589	646
0.104438	647
0.104519	648
0.104992	649
0.105195	650
0.105301	651
0.105578	652
0.105741	653
0.10584	654
0.106038	655
0.106139	656
0.106141	657
0.106169	658
0.106836	659
0.107116	660
0.107159	661
0.107212	662
0.107304	663
0.107608	664
0.107681	665
0.108112	666
0.108134	667
0.108193	668
0.108238	669
0.109139	670
0.109241	671
0.109446	672
0.109748	673
0.110169	674
0.110296	675
0.11031	676
0.11046	677
0.110511	678
0.110864	679
0.111237	680
0.111315	681
0.111672	682
0.111773	683
0.11223	684
0.112365	685
0.112536	686
0.112664	687
0.112841	688
0.112955	689
0.113716	690
0.113826	692
0.114038	693
0.114436	694
0.114534	695
0.114712	696
0.114717	697
0.114814	698
0.115012	699
0.115347	700
0.115474	701
0.115846	702
0.115885	703
0.115929	704
0.116396	705
0.1166	706
0.117102	707
0.117131	708
0.117332	709
0.117744	710
0.11822	711
0.118335	712
0.118856	713
0.118897	714
0.119376	715
0.119844	717
0.120483	718
0.120849	719
0.12095	720
0.121212	721
0.12195	722
0.122146	723
0.122512	724
0.122528	725
0.122838	726
0.123694	727
0.123753	728
0.123772	729
0.123804	730
0.123897	731
0.124007	732
0.124128	733
0.124326	734
0.124985	735
0.125502	736
0.12552	737
0.125553	738
0.125704	739
0.126099	740
0.126144	741
0.12622	742
0.12638	743
0.126394	744
0.126785	745
0.126918	746
0.12693	747
0.1273	748
0.127561	749
0.127642	750
0.128516	751
0.128773	752
0.129277	753
0.129854	754
0.130104	755
0.130273	756
0.130325	757
0.1304	758
0.130488	759
0.130509	760
0.130519	761
0.130715	762
0.130813	763
0.131154	764
0.131169	765
0.131186	766
0.131294	767
0.131387	768
0.131519	769
0.131734	770
0.131931	771
0.132135	772
0.132646	773
0.13281	774
0.133001	775
0.133236	776
0.133367	777
0.133543	778
0.133598	779
0.134211	780
0.134219	781
0.134386	782
0.134432	783
0.135294	784
0.135361	785
0.135437	786
0.135683	787
0.135746	788
0.135816	789
0.136138	790
0.136203	791
0.136447	792
0.137119	793
0.137296	794
0.137561	795
0.137591	796
0.137595	797
0.13776	798
0.13869	799
0.138912	800
0.13905	801
0.139144	802
0.139612	804
0.139643	805
0.13979	806
0.14007	807
0.140411	808
0.140533	809
0.14077	810
0.141364	811
0.141589	812
0.141645	813
0.141754	814
0.141907	815
0.1421	816
0.14221	817
0.142303	818
0.14261	819
0.142979	820
0.143059	821
0.143483	822
0.143527	823
0.143554	824
0.143772	825
0.143985	826
0.144879	827
0.145526	828
0.146142	829
0.146166	830
0.146359	831
0.146774	832
0.146847	833
0.146922	834
0.147361	835
0.147487	836
0.148096	837
0.148289	838
0.148545	839
0.148662	840
0.149045	841
0.149046	842
0.1505	843
0.150724	844
0.151153	845
0.151159	846
0.15181	847
0.151847	848
0.152085	849
0.152167	850
0.152339	851
0.152396	852
0.152516	853
0.152525	854
0.153078	855
0.153427	856
0.15348	857
0.153939	858
0.154278	859
0.15436	860
0.154382	861
0.154557	862
0.154623	863
0.154912	864
0.155726	865
0.155747	866
0.155772	870
0.156202	871
0.156912	872
0.157072	873
0.157189	874
0.1574	875
0.157792	876
0.157865	877
0.15839	878
0.158556	879
0.1588	880
0.159093	881
0.159133	882
0.159236	883
0.159896	884
0.160085	885
0.160209	886
0.160724	887
0.160893	888
0.162199	889
0.162274	890
0.162321	891
0.162513	892
0.162892	893
0.163313	894
0.163432	895
0.163831	896
0.163949	897
0.164243	898
0.164325	899
0.16476	900
0.165	901
0.165354	902
0.165456	903
0.165747	904
0.16618	905
0.166215	906
0.166258	907
0.166278	908
0.166404	909
0.166556	910
0.166667	912
0.166688	913
0.166778	914
0.167565	915
0.167949	916
0.168	917
0.168438	918
0.168614	919
0.169043	920
0.169126	921
0.169245	922
0.169329	923
0.16946	924
0.169577	925
0.169603	926
0.170195	927
0.170814	928
0.171178	929
0.171484	930
0.171513	931
0.171664	932
0.171944	933
0.172185	934
0.172227	935
0.17224	936
0.172465	937
0.173009	938
0.173102	939
0.173199	940
0.173327	941
0.17405	942
0.174317	943
0.174537	944
0.176437	945
0.176728	946
0.17701	947
0.177047	948
0.177063	949
0.17708	950
0.178617	951
0.17869	952
0.178827	953
0.179353	954
0.18021	955
0.180913	956
0.181489	957
0.183361	958
0.183915	959
0.184003	960
0.184377	961
0.185141	962
0.185306	963
0.185359	964
0.185582	965
0.1856	966
0.185601	967
0.186581	968
0.187289	969
0.187323	970
0.18745	971
0.1875	978
0.187748	979
0.188002	980
0.188121	981
0.188171	982
0.188265	983
0.188703	984
0.189088	985
0.189121	986
0.189367	987
0.189455	988
0.18964	989
0.189925	990
0.190415	991
0.190578	992
0.19059	993
0.190957	994
0.191012	995
0.191546	996
0.191613	997
0.19162	998
0.191804	999
0.192019	1000
0.192022	1001
0.192149	1002
0.192392	1003
0.192639	1004
0.192687	1005
0.192755	1006
0.194215	1007
0.194236	1008
0.194245	1009
0.194336	1010
0.19435	1011
0.194493	1012
0.19456	1013
0.194638	1014
0.19465	1015
0.194946	1016
0.195325	1017
0.19542	1018
0.195736	1019
0.195811	1020
0.196154	1021
0.196286	1022
0.196414	1023
0.196814	1024
0.197736	1025
0.197789	1026
0.198166	1027
0.198484	1028
0.198512	1029
0.198689	1030
0.198849	1031
0.198866	1033
0.199125	1034
0.199223	1035
0.199327	1036
0.199337	1037
0.199713	1038
0.199723	1039
0.200001	1040
0.20056	1041
0.200645	1042
0.200901	1043
0.201114	1044
0.201418	1045
0.201595	1046
0.202519	1047
0.202888	1048
0.203005	1049
0.203875	1050
0.20388	1051
0.203913	1052
0.204607	1053
0.205313	1054
0.205571	1055
0.205636	1056
0.206519	1057
0.207204	1058
0.20722	1059
0.207268	1060
0.207659	1069
0.207668	1070
0.207712	1071
0.208133	1072
0.208379	1073
0.209042	1074
0.209219	1075
0.209487	1076
0.20968	1077
0.209756	1078
0.210566	1079
0.211733	1080
0.212008	1081
0.213404	1082
0.213435	1083
0.213606	1084
0.214048	1085
0.214242	1086
0.214265	1087
0.214286	1088
0.214721	1089
0.215044	1090
0.216337	1091
0.21658	1092
0.217485	1093
0.217777	1094
0.217897	1095
0.218344	1096
0.218469	1097
0.218539	1098
0.218614	1099
0.218865	1100
0.218882	1101
0.219239	1102
0.219453	1103
0.21991	1104
0.220009	1105
0.220207	1106
0.220729	1107
0.220897	1108
0.221292	1109
0.221307	1110
0.221399	1111
0.221446	1112
0.222005	1113
0.222104	1114
0.222388	1115
0.222397	1116
0.222432	1117
0.222444	1118
0.222942	1119
0.223015	1120
0.22328	1121
0.223323	1122
0.223768	1123
0.224328	1124
0.224598	1125
0.224777	1126
0.225062	1127
0.225297	1128
0.225504	1129
0.226116	1130
0.22627	1131
0.226541	1132
0.227752	1133
0.227765	1134
0.227839	1135
0.228095	1136
0.228377	1137
0.228512	1138
0.228539	1139
0.229167	1140
0.229236	1141
0.229618	1142
0.22983	1143
0.230151	1144
0.230835	1145
0.231059	1146
0.231603	1147
0.232233	1177
0.232385	1178
0.233071	1179
0.23324	1180
0.23386	1181
0.233969	1182
0.234452	1183
0.234566	1184
0.234936	1185
0.235446	1186
0.23629	1187
0.236812	1188
0.236873	1189
0.237351	1190
0.238581	1191
0.238796	1192
0.238915	1193
0.239446	1194
0.239527	1195
0.239601	1204
0.239673	1205
0.23983	1206
0.240099	1207
0.24029	1208
0.240907	1209
0.240962	1210
0.242245	1211
0.243097	1212
0.243204	1213
0.243562	1214
0.243937	1215
0.244294	1216
0.244338	1217
0.24438	1218
0.244988	1219
0.245818	1220
0.245913	1221
0.246654	1222
0.246659	1223
0.248152	1224
0.248627	1225
0.248976	1226
0.249253	1227
0.249729	1228
0.250654	1229
0.251434	1230
0.25234	1231
0.253024	1232
0.253337	1233
0.254857	1234
0.255327	1235
0.256047	1236
0.256431	1237
0.258009	1238
0.258756	1239
0.261698	1240
0.261949	1241
0.262338	1242
0.262422	1243
0.26312	1244
0.263486	1245
0.264112	1246
0.26424	1247
0.264669	1248
0.264739	1249
0.264827	1250
0.264943	1251
0.265355	1252
0.265382	1253
0.265708	1254
0.266093	1255
0.266383	1256
0.266868	1257
0.266999	1258
0.267052	1259
0.267413	1260
0.267931	1261
0.26874	1262
0.26896	1263
0.26946	1264
0.269794	1265
0.270083	1266
0.27031	1267
0.270536	1268
0.270664	1269
0.271199	1270
0.271226	1271
0.271698	1272
0.27181	1273
0.271912	1274
0.272128	1275
0.272509	1276
0.272848	1277
0.273072	1278
0.273923	1279
0.274147	1280
0.274255	1281
0.274327	1282
0.274624	1283
0.275247	1284
0.277305	1285
0.277382	1286
0.278088	1287
0.279583	1288
0.280917	1289
0.281205	1290
0.281385	1291
0.281465	1292
0.281916	1293
0.282838	1294
0.283163	1295
0.283303	1296
0.283979	1298
0.284102	1299
0.284572	1300
0.286601	1301
0.286629	1302
0.28689	1303
0.287222	1304
0.288178	1305
0.288371	1306
0.28868	1307
0.288944	1308
0.289381	1309
0.289525	1310
0.290406	1311
0.290811	1312
0.290995	1313
0.291193	1314
0.291496	1315
0.291887	1316
0.293135	1317
0.293599	1318
0.29363	1319
0.294487	1320
0.295751	1321
0.295953	1322
0.296426	1323
0.296526	1324
0.296584	1325
0.296617	1326
0.297312	1327
0.297915	1328
0.298212	1329
0.29843	1330
0.298536	1331
0.29863	1332
0.29927	1333
0.299272	1334
0.299362	1335
0.299432	1336
0.299612	1337
0.299757	1338
0.300247	1339
0.30043	1340
0.300616	1341
0.301245	1342
0.30204	1343
0.302912	1344
0.303506	1345
0.305221	1346
0.305802	1347
0.306323	1348
0.307698	1349
0.307861	1351
0.309731	1352
0.309778	1353
0.309951	1354
0.310333	1355
0.310438	1356
0.310765	1357
0.311139	1358
0.312212	1359
0.312217	1360
0.3125	1361
0.312583	1362
0.313387	1363
0.314124	1364
0.314644	1365
0.315478	1366
0.315833	1367
0.315913	1368
0.316579	1369
0.317094	1370
0.317854	1371
0.317914	1372
0.31909	1373
0.319291	1374
0.32052	1375
0.321029	1376
0.321281	1377
0.321429	1378
0.322222	1379
0.322782	1380
0.323959	1381
0.324087	1382
0.324786	1383
0.325026	1384
0.325518	1385
0.325831	1386
0.325934	1387
0.325952	1388
0.326226	1389
0.327385	1390
0.328024	1391
0.329054	1392
0.329177	1393
0.329478	1394
0.330528	1395
0.330996	1396
0.331462	1397
0.332481	1398
0.333231	1399
0.333869	1400
0.334172	1401
0.3354	1402
0.337963	1403
0.339183	1404
0.339331	1405
0.34009	1406
0.341599	1407
0.342109	1408
0.342761	1409
0.343273	1410
0.343814	1411
0.345121	1412
0.345864	1413
0.346351	1414
0.346586	1415
0.347712	1416
0.348162	1417
0.348751	1418
0.351459	1419
0.351887	1420
0.351949	1421
0.352217	1423
0.353433	1424
0.353603	1425
0.354167	1426
0.354777	1427
0.354981	1428
0.355973	1429
0.356368	1430
0.356893	1431
0.357143	1432
0.357604	1433
0.361111	1436
0.361157	1437
0.361898	1438
0.363209	1439
0.36388	1440
0.365127	1441
0.365972	1442
0.366259	1443
0.366389	1444
0.367979	1445
0.368856	1446
0.36977	1447
0.369815	1448
0.373898	1449
0.375703	1450
0.375769	1451
0.376543	1452
0.378554	1453
0.379896	1454
0.380783	1455
0.381447	1456
0.381916	1457
0.382229	1458
0.383155	1459
0.386651	1460
0.389051	1461
0.389338	1462
0.389861	1463
0.390253	1464
0.390363	1465
0.392857	1466
0.394514	1467
0.39491	1468
0.396467	1469
0.398071	1470
0.398864	1471
0.399029	1472
0.399542	1473
0.4	1484
0.400834	1485
0.400856	1486
0.404558	1487
0.405406	1488
0.406789	1489
0.408706	1490
0.4095	1491
0.410188	1492
0.410565	1493
0.41091	1494
0.411353	1495
0.411643	1496
0.41166	1497
0.4125	1498
0.413035	1501
0.413376	1502
0.415635	1503
0.417096	1504
0.419375	1510
0.421112	1511
0.421707	1512
0.422058	1513
0.42263	1514
0.424064	1515
0.427894	1516
0.428327	1517
0.429099	1518
0.430801	1519
0.432522	1520
0.433117	1521
0.433392	1522
0.436582	1523
0.4375	1524
0.438631	1525
0.439651	1526
0.440729	1527
0.441024	1528
0.444631	1529
0.446404	1530
0.447177	1531
0.450116	1532
0.451679	1533
0.452003	1534
0.452443	1535
0.453511	1536
0.454071	1537
0.454896	1538
0.458492	1539
0.46059	1540
0.461451	1542
0.462581	1543
0.464002	1544
0.465697	1545
0.46798	1546
0.473423	1547
0.473963	1548
0.474383	1549
0.474912	1550
0.475291	1551
0.476518	1552
0.476741	1553
0.480227	1554
0.481764	1555
0.482823	1556
0.485011	1557
0.485208	1558
0.486214	1559
0.486799	1560
0.487171	1561
0.488564	1562
0.492705	1563
0.493915	1564
0.494308	1565
0.497247	1566
0.5	1574
0.500039	1575
0.50395	1576
0.505778	1577
0.506468	1578
0.511119	1579
0.513091	1580
0.515326	1581
0.515708	1582
0.51595	1583
0.519145	1584
0.522073	1585
0.523549	1586
0.526414	1587
0.529835	1588
0.530807	1589
0.536509	1590
0.536845	1591
0.537747	1592
0.540586	1593
0.542432	1594
0.550687	1595
0		47
0.00734937		48
0.018497		49
0.0208649		50
0.0233176		51
0.0248044		52
0.0255364		53
0.0286476		54
0.0289936		55
0.0299304		56
0.0318703		57
0.0335413		58
0.0337104		59
0.0339018		60
0.0342042		61
0.0348451		62
0.0351086		63
0.0365232		64
0.037308		65
0.0375771		66
0.0380232		67
0.0403545		68
0.0405616		69
0.0414612		70
0.0426815		71
0.044248		72
0.0444058		73
0.0444141		74
0.0448127		75
0.0454703		76
0.0455542		77
0.0463304		78
0.0467263		79
0.047168		80
0.0482447		81
0.0501778		82
0.0507032		83
0.0513484		84
0.0515008		85
0.0533966		86
0.0542064		87
0.0542508		88
0.0544667		89
0.0551316		90
0.0554825		91
0.0557572		92
0.0566288		93
0.0566574		94
0.0567182		95
0.0567778		96
0.0568265		97
0.0568321		98
0.0570236		99
0.0573609		100
0.0579674		101
0.0584831		102
0.0590913		103
0.0596363		104
0.0603475		105
0.060775		106
0.0621015		107
0.0625139		108
0.0625755		109
0.0631824		110
0.0632748		111
0.0634862		112
0.0635433		113
0.0635977		114
0.063718		115
0.0640903		116
0.0645562		117
0.0648101		118
0.0653079		119
0.0659551		120
0.0659991		121
0.0664605		122
0.0667437		123
0.0681142		124
0.0682671		125
0.0684184		126
0.068937		127
0.0691655		128
0.0694317		129
0.0694564		130
0.069582		131
0.0696996		132
0.0698653		133
0.0699998		134
0.0712361		135
0.071575		136
0.0718123		137
0.0720956		138
0.0721275		139
0.0729162		140
0.072949		141
0.0735775		142
0.0737492		143
0.0740424		144
0.0741829		145
0.0748506		146
0.0750012		147
0.0752874		148
0.0762965		149
0.0767737		150
0.0770342		151
0.077384		152
0.0776477		153
0.0780547		154
0.0782304		155
0.0791636		156
0.0792889		157
0.0793586		158
0.079824		159
0.0801049		160
0.0804892		161
0.0806369		162
0.0809594		163
0.08174		164
0.0822523		165
0.0822837		166
0.0823506		167
0.0830831		168
0.0830861		169
0.0831019		170
0.0832711		171
0.08333		172
0.0839514		173
0.0840207		174
0.0845368		175
0.0855137		176
0.0860277		177
0.086079		178
0.0861275		179
0.0861602		180
0.0870614		181
0.0875091		182
0.0880642		183
0.0882039		184
0.0891728		185
0.0893276		186
0.0894175		187
0.0897877		188
0.0899085		189
0.0900238		190
0.0905232		191
0.0907059		192
0.090733		193
0.0910553		194
0.091764		195
0.0921584		196
0.0929122		197
0.0929713		198
0.0930157		199
0.0933603		200
0.0934229		201
0.0934716		202
0.0938646		203
0.0943495		204
0.0958004		205
0.0963879		206
0.0966382		207
0.0966682		208
0.0970264		209
0.0970738		210
0.0977199		211
0.0978346		212
0.0981679		213
0.0984726		214
0.0985515		215
0.0986847		216
0.0992388		217
0.0998419		218
0.100096		219
0.100625		220
0.101013		221
0.101176		222
0.101191		223
0.101751		224
0.101814		225
0.102005		226
0.102081		227
0.102197		228
0.102817		229
0.102829		230
0.102928		231
0.103778		232
0.104087		233
0.104099		234
0.104527		235
0.104956		236
0.105268		237
0.105489		238
0.10562		239
0.10596		240
0.106058		241
0.107515		242
0.108128		243
0.10882		244
0.109177		245
0.10918		246
0.109276		247
0.109459		248
0.110778		249
0.110868		250
0.111338		251
0.111455		252
0.111816		253
0.111937		254
0.112323		255
0.11279		256
0.112813		257
0.113337		258
0.113463		259
0.114105		260
0.114301		261
0.114464		262
0.114521		263
0.115398		264
0.115459		265
0.115809		266
0.116313		267
0.116587		268
0.116746		269
0.117071		270
0.117583		271
0.117591		272
0.118204		273
0.118479		274
0.118918		275
0.119115		276
0.119285		277
0.119299		278
0.119693		279
0.119785		280
0.119844		282
0.119875		283
0.120204		284
0.120547		285
0.120622		286
0.121003		287
0.121381		288
0.121439		289
0.122204		290
0.123526		291
0.12395		292
0.124143		293
0.124391		294
0.124459		295
0.124633		296
0.124715		297
0.124784		298
0.125081		299
0.125882		300
0.125908		301
0.125938		302
0.126319		303
0.126565		304
0.126614		305
0.127747		306
0.127773		307
0.12791		308
0.128387		309
0.128621		310
0.128979		311
0.129683		312
0.129882		313
0.13		314
0.130401		315
0.130422		316
0.132036		317
0.132812		318
0.13306		319
0.133132		320
0.13336		321
0.133854		322
0.134315		323
0.134343		324
0.134446		325
0.135185		326
0.135459		327
0.135981		328
0.136051		329
0.136753		330
0.137099		331
0.137267		332
0.137358		333
0.137738		334
0.13777		335
0.138241		336
0.139017		337
0.139219		338
0.139512		339
0.14054		340
0.141589		341
0.14198		342
0.14241		343
0.142488		344
0.142624		345
0.143155		346
0.143974		347
0.144131		348
0.144365		349
0.144915		350
0.145298		351
0.146761		352
0.146995		353
0.147168		354
0.147197		355
0.147312		356
0.147412		357
0.148075		358
0.148439		359
0.148677		360
0.148997		361
0.149241		362
0.149666		363
0.149823		364
0.149913		365
0.150114		366
0.150167		367
0.1504		368
0.1505		369
0.150586		370
0.15059		371
0.150966		372
0.151206		373
0.151258		374
0.151496		375
0.151986		376
0.152838		377
0.153989		378
0.154122		379
0.15512		380
0.155772		382
0.157029		383
0.157258		384
0.158932		385
0.159107		386
0.159248		387
0.159687		388
0.160236		389
0.160583		390
0.16095		391
0.161307		392
0.16137		393
0.161956		394
0.163115		395
0.163346		396
0.163684		397
0.163965		398
0.164148		399
0.164462		400
0.164489		401
0.164641		402
0.164814		403
0.164846		404
0.164871		405
0.165024		406
0.165226		407
0.165548		408
0.165843		409
0.166084		410
0.166116		411
0.166173		412
0.166483		413
0.166667		414
0.166701		415
0.166771		416
0.167079		417
0.167161		418
0.167435		419
0.167538		420
0.167835		421
0.168154		422
0.168492		423
0.168565		424
0.168718		425
0.169076		426
0.16932		427
0.169883		428
0.170201		429
0.170292		430
0.170744		431
0.171009		432
0.171661		433
0.171947		434
0.172455		435
0.172645		436
0.172897		437
0.173276		438
0.173575		439
0.173859		440
0.173895		441
0.173929		442
0.17397		443
0.174243		444
0.174293		445
0.174548		446
0.174579		447
0.174923		448
0.175066		449
0.175453		450
0.175495		451
0.175686		452
0.17571		453
0.176021		454
0.17608		455
0.176102		456
0.176386		457
0.177087		458
0.177237		459
0.177431		460
0.177477		461
0.177633		462
0.177845		463
0.178228		464
0.178265		465
0.178341		466
0.178433		467
0.178653		468
0.179224		469
0.179285		470
0.179417		471
0.17962		472
0.179773		473
0.180095		474
0.180224		475
0.180876		476
0.180898		477
0.180992		478
0.181257		479
0.181772		480
0.181919		481
0.181997		482
0.182438		483
0.182838		484
0.183004		485
0.183602		486
0.183636		487
0.183915		488
0.184036		489
0.184241		490
0.184414		491
0.185166		492
0.18529		493
0.186082		494
0.186286		495
0.186752		496
0.187008		497
0.187146		498
0.1875		502
0.187566		503
0.188128		504
0.188425		505
0.188871		506
0.18889		507
0.189464		508
0.18978		509
0.189975		510
0.191019		511
0.191475		512
0.191831		513
0.191867		514
0.191892		515
0.191999		516
0.19204		517
0.192295		518
0.192336		519
0.192475		520
0.192789		521
0.192799		522
0.19285		523
0.19297		524
0.193412		525
0.193448		526
0.193513		527
0.194048		528
0.194644		529
0.195077		530
0.195165		531
0.195229		532
0.195341		533
0.195389		534
0.195581		535
0.19563		537
0.196596		538
0.19661		539
0.196668		540
0.197006		541
0.19711		542
0.197697		543
0.19822		544
0.198413		545
0.198597		546
0.198866		547
0.19926		548
0.199312		549
0.199353		550
0.199394		551
0.199426		552
0.199536		553
0.199537		554
0.199959		555
0.200153		556
0.20049		557
0.200551		558
0.20103		559
0.201055		560
0.20158		561
0.202237		562
0.202769		563
0.203021		564
0.203159		565
0.20363		566
0.203939		567
0.20437		568
0.204435		569
0.205032		570
0.20513		571
0.205433		572
0.205739		573
0.206028		574
0.206192		575
0.207215		576
0.207659		577
0.207676		578
0.208442		579
0.208891		580
0.210015		581
0.210227		582
0.210817		583
0.211329		585
0.211597		586
0.211609		587
0.211692		588
0.211894		589
0.21243		590
0.212469		591
0.212856		592
0.212884		593
0.213567		594
0.213577		595
0.213705		596
0.214942		597
0.215365		598
0.215879		599
0.216007		600
0.216394		601
0.216855		602
0.216876		603
0.217052		604
0.217278		605
0.217526		606
0.217885		607
0.217992		608
0.218079		609
0.218176		610
0.218234		611
0.218369		612
0.219327		613
0.219448		614
0.219629		615
0.219776		616
0.219872		617
0.219965		618
0.2203		619
0.220395		620
0.220912		621
0.22092		622
0.221469		623
0.222064		624
0.222076		625
0.222522		626
0.22352		627
0.224231		628
0.224314		629
0.224451		630
0.224486		631
0.22505		632
0.225604		633
0.226468		634
0.226548		635
0.227182		636
0.227715		637
0.228062		638
0.228572		639
0.229444		640
0.229571		641
0.229985		642
0.230124		643
0.230554		644
0.230648		645
0.231043		646
0.232233		662
0.232323		663
0.232544		664
0.232548		665
0.232552		666
0.232781		667
0.233295		668
0.233545		669
0.233675		670
0.23413		671
0.234914		672
0.235622		673
0.236266		674
0.236484		675
0.236526		676
0.236571		677
0.237016		678
0.237714		679
0.237867		680
0.237925		681
0.238249		682
0.23885		683
0.23911		684
0.239286		685
0.239523		686
0.239583		687
0.239601		689
0.240058		690
0.240965		691
0.241143		692
0.241581		693
0.241594		694
0.241728		695
0.24258		696
0.242997		697
0.243233		698
0.244103		699
0.244276		700
0.244517		701
0.245106		702
0.245617		703
0.246016		704
0.246922		705
0.247072		706
0.247771		707
0.247812		708
0.248679		709
0.249583		710
0.24962		711
0.250617		712
0.251304		713
0.251501		714
0.252121		715
0.252706		716
0.252774		717
0.252785		718
0.252916		719
0.253133		720
0.253501		721
0.253919		722
0.254238		723
0.254616		724
0.254915		725
0.255096		726
0.25518		727
0.255721		728
0.255793		729
0.255996		730
0.256393		731
0.256633		732
0.256848		733
0.256991		734
0.257074		735
0.257139		736
0.257612		737
0.257996		738
0.258562		739
[truncated: 1,944 more rows]
