# Supplementary material for: A dual role for Cav1.4 Ca2+ channels in the molecular and structural organization of the rod photoreceptor synapse
Source: eLife journal article supplement (doi:10.7554/elife.62184), 2020-09-17
Supplement: fig3-data1 [file Figure 3F.xlsx]

## Sheet: EPSC amplitudes
WT				Cav1.4 KO				G369i KI
Cell	-60 mV	+60 mV		Cell	-60 mV	+60 mV		Cell	-60 mV	+60 mV
01152020_002_11	5.43637	10.2347		01172020_002	-0.65634	-2.58111		01162020_002	-4.52393	7.16311
01212020_001	-7.66403	24.3371		01232020_001	0.31577	0.5274		01222020_001	-3.18092	4.85369
01212020_002	-4.23382	12.2851		01232020_002	3.68074	-0.86062		01222020_002	-1.959	6.95775
01212020_003	-10.7728	22.8924		01232020_003	3.37066	-2.98022		01222020_003	-1.69626	8.51008
01212020_004	2.00814	29.245						01222020_004	-5.88645	5.19322
								01222020_005	-4.14487	9.12906
