# Supplementary material for: A dual role for Cav1.4 Ca2+ channels in the molecular and structural organization of the rod photoreceptor synapse
Source: eLife journal article supplement (doi:10.7554/elife.62184), 2020-09-17
Supplement: fig4-data1 [file sprouting neurites.xlsx]

## Sheet: Grouped data
Antibody	PKCa			SCGN			Calbindin					total image area= 144um (l) x 24.12um (h) = 3473.28um^2 *6 images/group = 20839.68
Sum all neurites	20.359	1615.29	297.071	1.82	206.584	29.814	30.01	1350.46	784.253			neurite area per 100um^2= sum(all neurite areas) / 208.3968
Group	P42 WT	P42 KO	P42 KI	P42 WT	P42 KO	P42 KI	P42 WT	P42 KO	P42 KI
Neurite areas (all 6 images per group)	2.257	0.259	1.069	1.049	1.296	3.089	2.218	1.231	41.621			PKCa
	0.832	8.197	0.792	0.317	0.292	1.03	1.624	1.166	38.373			P42 WT	P42 KO	P42 KI
	0.356	0.583	0.317	0.454	0.389	1.685	0.99	11.308	0.752		area per 100um^2	0.0976934	7.75105	1.42551
	0.292	3.467	0.356		0.292	0.259	0.515	0.778	5.465
	3.402	36.709	0.713		0.389	0.842	0.673	1.037	0.594			SCGN
	0.454	1.231	0.634		0.486	0.454	0.436	3.402	1.267			P42 WT	P42 KO	P42 KI
	0.324	0.518	1.109		4.601	0.292	0.324	0.324	0.356		area per 100um^2	0.00873334	0.991301	0.143064
	1.652	18.338	0.356		3.564	0.324	0.454	0.324	0.475
	0.778	0.648	1.109		0.324	0.389	0.259	0.907	0.436			Calbindin
	0.356	19.796	0.792		0.518	0.259	0.842	3.629	1.426			P42 WT	P42 KO	P42 KI
	0.486	2.722	0.673		1.847	0.389	0.648	0.259	1.742		area per 100um^2	0.144004	6.48026	3.76327
	4.212	6.836	0.594		2.916	0.616	0.421	0.518	1.148
	1.912	8.392	24.79		1.102	0.356	0.583	0.875	0.436
	1.588	7.614	0.634		0.778	1.069	0.778	0.292	1.624
	0.745	0.356	0.277		1.361	6.221	5.508	1.231	0.792
	0.389	16.621	0.317		0.421	0.356	1.134	0.551	0.752
	0.324	39.01	1.822		0.259	1.588	2.365	0.454	1.505
		1.555	8.673		2.884	1.102	4.147	3.402	0.713
		16.945	0.356		0.486	0.778	1.976	1.912	0.713
		2.592	0.277		0.454	2.884	1.62	0.356	35.245
		0.648	0.317		1.393	2.916	1.264	0.292	1.386
		1.879	7.841		0.454	1.588	1.231	0.648	0.673
		1.426	1.663		0.583	0.421		31.428	0.356
		7.452	0.277		0.421	0.907		3.532	0.356
		0.713	4.554		0.842			0.486	0.554
		0.842	1.663		5.897			0.486	5.346
		1.49	0.648		3.013			3.143	1.109
		0.583	0.389		1.069			1.361	5.425
		0.778	12.992		0.259			0.259	1.267
		2.236	4.698		0.583			0.356	4.198
		1.231	1.426		3.726			0.616	0.752
		0.292	2.592		0.324			1.717	0.554
		0.356	0.583		1.75			1.134	0.594
		0.518	1.588		1.004			0.94	0.356
		0.324	0.972		2.3			0.551	0.554
		0.356	0.356		3.791			0.356	5.346
		0.259	0.842		0.389			5.281	0.752
		0.972	1.166		0.875			0.486	0.554
		0.259	1.847		1.166			0.745	1.861
		0.875	0.292		0.583			0.842	0.277
		0.259	1.037		1.296			0.875	0.871
		0.421	2.138		0.875			2.106	16.197
		0.356	0.259		0.583			0.324	1.663
		1.62	0.551		4.212			0.842	0.713
		0.842	0.486		0.745			0.518	1.188
		1.166	0.81		0.324			28.577	0.277
		0.259	0.324		5.962			4.244	0.594
		0.356	0.389		6.253			0.907	0.911
		3.856	0.292		1.102			9.072	1.188
		2.171	0.583		0.259			0.518	4.317
		0.454	0.81		3.013			0.324	0.594
		0.551	0.259		2.333			2.009	1.861
		0.94	2.009		4.05			1.912	0.99
		33.145	0.421		3.694			7.16	1.94
		0.454	0.518		2.236			0.356	0.475
		2.171	1.393		1.231			0.713	1.663
		13.381	3.143		3.532			1.426	0.792
		24.786	0.356		0.518			0.259	5.227
		0.421	3.499		0.81			7.906	0.356
		16.589	4.892		0.551			0.356	0.99
		27.799	0.648		1.004			1.296	0.317
		0.454	1.037		1.782			0.259	1.386
		0.81	1.102		1.652			0.389	1.228
		9.169	1.555		0.616			3.532	1.386
		0.356	0.486		2.268			2.009	0.356
		0.356	0.259		1.004			1.652	0.317
		11.405	0.421		0.616			0.389	0.277
		15.746	0.292		1.49			6.739	1.188
		8.554	0.292		0.356			0.616	1.822
		0.259	0.389		1.037			0.292	1.742
		1.588	11.178		1.037			0.324	4.713
		0.389	0.94		0.745			0.583	0.634
		3.564	2.333		1.134			1.037	2.336
		0.583	1.264		0.486			2.398	0.396
		1.102	1.458		2.495			5.378	7.049
		18.338	3.046		2.657			0.259	0.515
		0.259	4.082		1.199			0.713	3.524
		3.985	1.685		2.916			0.389	1.426
		0.81	0.778		1.588			0.324	6.93
		10.757	5.184		0.356			4.147	0.317
		1.004	1.685		1.231			0.324	0.277
		2.657	2.981		0.486			0.292	1.782
		1.166	0.356		0.356			3.661	1.148
		2.009	0.454		0.745			2.041	1.069
		1.037	1.685		0.616			0.745	3.168
		4.244	2.43		0.259			0.518	0.713
		0.68	1.231		4.277			1.102	16.135
		0.972	1.037		0.259			0.259	25.564
		1.393	0.648		0.324			0.518	4.99
		0.94	1.555		0.94			0.259	1.134
		0.583	1.199		0.454			0.389	1.004
		0.259	0.68		1.134			0.259	3.37
		0.259	0.421		0.583			0.842	0.421
		0.583	0.583		0.259			0.518	1.976
		0.259	0.68		0.421			1.912	1.037
		0.616	0.259		3.856			0.259	0.745
		0.81	0.454		1.134			1.588	0.745
		0.616	3.046		2.981			33.242	0.259
		0.292	0.292		5.54			1.004	0.324
		0.454	4.73		1.037			0.259	0.518
		0.292	0.68		3.532			8.942	0.324
		5.378	0.486		5.281			0.454	0.259
		0.259	10.822		0.292			0.583	0.421
		0.583	5.929		0.518			0.356	0.875
		3.078	7.906		3.402			9.04	1.426
		6.35	7.387		0.907			1.004	0.518
		0.292	0.292		3.013			0.259	0.356
		39.625	4.633		1.231			5.443	0.616
		2.138	4.633		0.486			0.454	10.886
		0.81	3.661		0.551			0.421	0.356
		24.559	0.486		0.356			7.711	0.292
		3.856	1.458		0.324			0.94	0.68
		1.004	1.231		0.875			8.327	13.446
		0.616	1.75		1.069			8.78	0.356
		19.958	0.259		0.324			9.817	0.583
		17.496	0.713		1.717			0.745	5.994
		0.389	0.292		1.264			0.842	0.68
		7.841	0.389		5.346			0.292	0.81
		11.405	0.292		1.264			0.421	0.616
		8.165	0.356		1.426			0.259	2.851
		15.034	0.324		6.253			0.259	0.875
		14.062	2.819		0.486			0.454	0.259
		1.912	19.375		3.013			1.328	0.324
		0.421	8.683		0.259			0.713	0.389
		3.823	1.328		0.778			2.754	0.356
		6.934	1.361		1.426			0.292	0.324
		0.356	2.203		0.875			1.944	0.324
		1.166	0.551		0.518			1.264	9.331
		0.324	4.018		0.842			9.234	0.454
		5.378	3.791		6.448			1.004	0.324
		3.629	0.356		0.518			0.616	2.3
		1.782	0.81					0.454	0.842
		1.264	0.907					2.884	0.389
		0.551	1.166					0.389	1.166
		1.652	3.953					10.174	1.361
		0.486	3.078					0.68	0.94
		0.324	2.462					1.62	0.94
		2.722	1.685					1.62	0.972
		12.442	2.56					0.259	0.518
		1.296	0.616					0.389	1.166
		0.421						0.421	0.259
		8.392						0.486	0.454
		0.389						5.702	0.356
		0.454						0.292	0.356
		11.34						1.62	0.713
		33.599						0.81	0.421
		5.281						2.3	0.68
		12.798						0.421	1.685
		7.452						1.361	0.616
		2.398						0.616	0.259
		7.97						0.713	0.292
		0.292						0.421	0.259
		7.29						0.68	0.356
		1.458						0.745	0.875
		0.68						0.389	0.324
		0.68						4.795	1.458
		0.518						0.745	0.648
		3.791						0.648	4.115
		4.633						0.454	2.268
		7.063						0.616	0.389
		1.328						0.389	7.873
		0.551						1.037	0.713
		0.81						5.022	0.583
		21.06						0.259	11.534
		0.486						0.259	0.518
		24.43						0.486	0.259
		10.886						4.374	0.421
		16.362						0.292	0.259
		17.95						0.292	0.356
		29.225						0.648	3.337
		0.81						0.259	0.616
		1.264						0.745	0.454
		0.745						2.916	0.421
		29.322						2.171	0.292
		4.471						0.486	0.454
		1.134						1.523	3.985
		12.247						3.629	0.292
		0.356						0.259	0.875
		1.328						1.199	0.259
		10.724						0.907	1.879
		25.304						1.037	1.426
		1.166						2.074	0.389
		1.523						2.786	0.259
		0.421						6.091	0.713
		6.869						6.156	0.972
		0.583						0.421	0.454
		0.259						1.004	0.389
		4.147						0.745	0.68
		3.337						0.292	3.013
		1.75						0.778	0.518
		3.305						0.259	3.953
		0.94						3.856	0.389
		0.389						0.94	0.648
		0.389						0.518	0.518
		2.041						6.448	1.102
		0.907						2.138	0.259
		2.3						3.272	1.458
		0.259						0.713	0.713
		1.166						0.518	0.518
		0.907						0.259	0.907
		0.583						1.361	5.378
		0.842						0.356	0.421
		0.81						0.81	4.309
		23.101						0.778	1.069
		0.421						0.389	3.24
		11.729						8.132	0.259
		0.94						0.551	0.68
		95.353						0.551	0.324
		1.296						3.046	0.356
		0.389						6.415	0.94
		12.96						1.166	0.907
		9.072						1.166	0.259
		10.433						0.259	1.004
		13.381						0.842	0.356
		0.616						2.365	0.292
		14.321						2.462	1.199
		3.305						3.24	0.551
		27.734						0.648	0.486
		2.981						2.624	0.259
		0.518						0.454	0.421
		0.972						0.907	0.486
		0.907						0.421	1.069
		2.074						0.292	1.231
		0.648						0.486	0.324
		2.722						0.583	0.486
		1.814						0.324	0.518
		1.199						7.484	0.616
		0.518						6.221	0.259
		0.583						10.984	0.454
		0.94						4.212	6.415
		0.259						0.486	1.134
		11.048						0.972	0.616
		6.642						47.012	2.981
		0.292						1.523	0.778
		0.259						0.259	1.296
		0.259						0.324	0.486
		2.948						0.454	0.324
		0.259						0.356	0.259
		21.287						43.222	2.398
		28.285						2.268	0.68
		0.616						0.616	0.421
		1.49						0.259	0.842
		0.389						0.324	1.976
		2.203						1.555	0.94
		1.296						1.037	0.972
		14.483						1.037	3.272
		0.745						1.393	1.004
		0.324						0.454	5.443
		2.56						2.462	0.356
		15.034						0.68	1.328
		0.583						12.96	1.069
		13.057						1.328	0.259
		3.078						2.268	0.292
		0.486						0.356	2.819
		1.296						0.292	0.583
		30.618						1.069	0.259
		1.166						0.324	0.292
		24.818						0.421	0.259
		1.782						0.421	0.486
		14.159						0.454	2.106
		7.225						3.758	0.551
		18.209						2.106	1.426
		0.356						0.81	0.324
		0.292						0.551	0.356
		3.37						0.259	16.913
		0.648						0.292	0.81
		8.262						1.588	15.552
		1.166						0.292	10.206
		1.426						0.389	1.393
		0.454						0.324	0.324
		2.074						0.259	0.454
		0.421						1.037	7.128
		0.389						2.527	0.68
		28.447						13.057	2.398
		2.624						0.518	0.389
		1.976						0.486	0.292
		2.462						1.037	1.328
		10.109						0.486	1.393
		3.337						0.259	5.962
		0.292						1.393	0.292
		2.009						12.928	0.259
		5.054						0.356	15.714
		6.026						0.292	1.231
		0.551						0.972	0.259
		6.415						0.454	0.259
		1.037						1.847	0.875
		0.778						0.745	1.069
		1.976						0.292	1.393
		2.074						0.292	1.555
		2.657						1.879	1.912
		0.81						1.782	0.292
		0.292						3.661	0.551
								5.152	1.264
								0.616	0.842
								0.389	0.324
								0.583	0.356
								0.486	1.102
								0.324	1.393
								2.009	9.979
								0.292	0.972
								0.324	2.041
								2.203	0.389
								0.389	0.778
								0.68	0.389
								0.842	2.43
								1.814	1.426
								0.421	0.616
								0.486	0.389
								1.523	3.402
								0.259	1.004
								0.259	0.421
								0.454	0.389
								0.778	0.713
								0.648	0.486
								1.231	1.847
								0.356	1.62
								1.037	3.402
								0.778	0.616
								0.81	0.389
								6.901	1.426
								10.919	0.421
								0.292	5.443
								0.454	2.916
								0.551	2.074
								0.454	0.486
								0.616	0.356
								1.231	0.583
								2.268	0.518
								0.356	0.583
								1.328	0.292
								18.922	0.259
								0.292	2.074
								8.294	0.259
								3.694	0.94
								1.458	0.486
								0.454	1.264
								9.04	0.551
								1.296	0.454
								0.421	0.259
								0.356	0.259
								0.389	0.259
								5.184	2.884
								1.847	0.551
								3.337	7.031
								1.069	0.292
								1.555	8.586
								0.551	0.292
								9.137	2.786
								0.518	1.847
								4.082	0.745
								0.292	0.583
								0.518	0.486
								1.685	0.713
								0.745	0.356
								6.221	0.583
								2.916	0.421
								2.268	1.75
								1.231	2.236
								0.648	0.616
								0.745	0.292
								2.56	0.454
								0.68	3.337
								1.847	0.389
								0.324	0.421
								0.389	0.389
								0.518	0.972
								2.624	1.328
								2.43	0.778
								0.324	1.328
								0.259	0.356
								0.259	4.99
								0.454	0.389
								0.259	0.324
								0.68	1.069
								0.713	0.713
								0.324	0.356
								0.421	0.259
								0.292	0.842
								0.356	0.486
								0.292	0.842
								5.702	0.778
								4.147	1.037
								0.81	0.68
								0.551	3.532
								7.128	0.292
								1.134	0.356
								0.518	1.879
								6.577	0.583
								1.426	0.972
								0.324	0.68
								0.356	0.324
								0.454	0.81
								3.11	0.356
								0.356	0.389
								0.389	1.361
								0.551	0.356
								17.788	1.361
								5.476	0.583
								0.259	6.156
								2.171	0.259
								1.328	1.037
								0.551	0.518
								0.259	4.212
								2.074	3.532
								1.588	1.037
								0.583	0.292
								0.778	0.81
								4.763	0.292
								0.745	1.134
								0.356	0.389
								0.454	0.616
								0.324	0.389
								0.972	0.356
								0.259	2.365
								1.069	0.259
								0.324	0.421
								0.616	0.907
								0.389	0.518
								0.421	0.518
								0.713	0.842
								1.296	0.259
								0.324	2.009
								0.356	0.421
								0.389	0.421
								3.272	0.778
								0.648	1.652
								0.324	1.328
								0.292	1.879
								2.398	1.199
								0.778	0.778
								0.324
								0.389
								1.361
								0.356
								0.713
								10.174
								0.616
								0.518
								3.11
								2.884
								0.259
								0.778
								2.786
								0.842
								0.356
								3.467
								0.292
								2.819
								0.518
								0.259
								0.324
								5.67
								0.583
								4.018
								1.004
								0.745
								0.259
								0.486
								2.56
								0.421
								0.518
								0.713
								4.471
								0.94
								0.583
								0.356
								4.957
								0.389
								2.624
								0.356
								1.814
								0.421
								0.259
								0.972
								2.819
								0.259
								0.292
								0.259
								1.588
								0.454
								0.324
								0.259
								2.236
								0.972
								0.518
								0.616
								0.324
								0.583
								0.875
								0.356
								0.389
								0.454
								0.259
								1.458
								0.292
								2.009
								1.231
								1.75
								0.324
								0.421
								0.292
								1.264
								0.68
								0.68
								0.454
								10.789
								0.356
								0.551
								0.713
								0.486
								0.292
								0.518
								0.583
								2.3
								1.458
								0.648
								0.81
								1.652
								0.389
								0.551
								2.009
								0.389
								0.324
								0.259
								1.328
								0.356
								0.389
								0.259
								0.389
								8.748
								0.259
								0.259
								0.972
								1.847
								0.356
								0.292
								0.356
								0.389
								0.421
								0.616
								23.911
								0.842
								0.68
								1.814
								2.041
								0.81
								0.324
								0.551
								6.156
								3.078
								2.786
								0.648
								3.629
								0.292
								2.009
								0.551
								0.389
								0.292
								0.518
								1.004
								0.356
								4.406
								0.842
								0.292
								0.324
								0.259
								0.389
								2.495
								0.324
								1.264
								0.875
								4.957
								0.259
								0.551
								1.426
								3.143
								0.356
								0.583
								0.842
								0.842
								0.454
								0.356
								0.778
								0.324
								0.616
								0.518
								0.259
								0.259
								2.106
								1.912
								0.616
								0.292
								0.875
								0.356
								0.745
								0.486
								0.324
								0.292
								0.972
								4.277
								0.551
								2.916
								0.324
								0.907
								0.324
								0.551
								0.842
								4.86
								1.847
								1.717
								0.68
								0.324
								1.102
								0.259
								3.305
								0.324
								0.875
								3.143
								1.004
								0.389
								0.583
								0.259
								3.337
								1.328
								1.199
								3.953
								0.972
								0.292
								0.842
								3.305
								2.657
								0.356
								1.102
								0.454
								5.022
								0.875
								0.389
								14.256
								1.588
								0.972
								0.713
								0.389
								0.875
								1.004
								5.378
								0.713
								0.356
								1.166
								0.551
								3.208
								0.583
								0.324
								27.443
								3.856
								5.8
								0.616
								0.454
								2.074
								0.356
								0.389
								0.842
								1.004
								10.53
								0.454
								0.356
								0.68
								0.389
								4.666
								1.199
								0.616
								0.259
								0.583
								0.81
								0.324
								2.43
								0.324
								0.583
								0.292
								0.842
								1.847
								3.046
								15.001
								2.43
								1.426
								0.356
								0.713
								0.648
								0.583
								0.713
								2.851
								0.454
								0.421
								0.486
								0.616
								2.365
								0.454

## Sheet: Raw data (by image)
								total image area= 144um (l) x 24.12um (h) = 3473.28um^2
	sum							per 100um^2										ImageJ particle analysis:
image	P21WT	P21KO	P21KI	P42WT	P42KO	P42KI	image	P21WT	P21KO	P21KI	P42WT	P42KO	P42KI					1. within colorized collapsed (max projection) z-stack, create rectangular ROI 36um into ONL from uppermost PKCa cell body
1	1.847	28.253	101.313	6.456	345.577	256.528	1	0.0531927	0.813673	2.91777	0.18593	9.95245	7.38788			calbindin		2. crop ROI to 24um (so that ROI is 12um above OPL border)
2	30.521	34.538	84.145	0	131.899	132.026	2	0.87899	0.994678	2.42334	0	3.79863	3.80229			SCGN		3. crop image to ROI, split channels
3	0.486	3.759	79.251	3.531	358.411	62.629	3	0.0139966	0.108257	2.28239	0.101691	10.3221	1.80369			PKCa		4. threshold using Li parameter (do NOT adjust sliders) and apply to invert LUT
4	33.759	44.028	45.553	0.778	172.075	74.062	4	0.972243	1.26799	1.3119	0.022406	4.95568	2.13295					5 analyze particles with the following parameters: size 0.25-100 MICRONS (check box) circularity 0-0.8 include holes show bare outlines (same parameters for each channel)
5	45.261	211.959	109.769	19.245	149.428	151.247	5	1.3035	6.10432	3.16129	0.554247	4.30345	4.35584
6	1.685	149.556	51.741	0	193.075	107.761	6	0.0485272	4.30714	1.49012	0	5.56047	3.10347
1	0.389	3.046	0	3.366	26.506	4.119	1	0.0111998	0.0876981	0	0.0969113	0.76314	0.118591
2	0	0	0	0	36.61	1.685	2	0	0	0	0	1.05405	0.0485132
3	0	0.389	0	0.454	35.544	1.555	3	0	0.0111998	0	0.0130712	1.02336	0.0447704
4	0	0.324	1.231	0	28.511	1.005	4	0	0.00932836	0.035442	0	0.820867	0.0289352
5	0	12.538	5.411	0	10.271	1.264	5	0	0.360984	0.155789	0	0.295715	0.0363921
6	0	8.781	1.652	0	69.142	20.186	6	0	0.252816	0.0475631	0	1.99068	0.58118
1	2.592	119.103	30.684	3.445	211.96	61.975	1	0.0746269	3.42912	0.88343	0.0991858	6.10259	1.78434
2	25.823	74.034	70.698	0	240.502	30.391	2	0.743476	2.13153	2.03548	0	6.92435	0.874994
3	0	45.555	17.303	7.258	217.92	28.997	3	0	1.31158	0.498175	0.208967	6.27418	0.834859
4	22.714	93.312	44.744	0.486	378.235	49.542	4	0.653964	2.68657	1.28823	0.0139925	10.8899	1.42638
5	25.953	100.344	38.167	9.17	241.996	63.083	5	0.747219	2.88903	1.09887	0.264016	6.96736	1.81624
6	0.648	50.513	9.915	0	324.68	63.083	6	0.0186567	1.45433	0.285465	0	9.34794	1.81624
P42
P42 WT1		P42 WT2		P42 WT3		P42 WT4		P42 WT5		P42 WT6		P42 KO1		P42 KO2		P42 KO3		P42 KO4		P42 KO5		P42 KO6		P42 KI1		P42 KI2		P42 KI3		P42 KI4		P42 KI5		P42 KI6
1	2.218	0	0	1	0.324	1	0.778	1	5.508	0	0	1	1.231	1	0.486	1	7.484	1	2.624	1	2.236	1	0.972	1	41.621	1	16.135	1	1.458	1	0.907	1	16.913	1	0.259
2	1.624			2	0.454			2	1.134			2	1.166	2	5.702	2	6.221	2	2.43	2	0.972	2	4.277	2	38.373	2	25.564	2	0.648	2	5.378	2	0.81	2	0.259
3	0.99			3	0.259			3	2.365			3	11.308	3	0.292	3	10.984	3	0.324	3	0.518	3	0.551	3	0.752	3	4.99	3	4.115	3	0.421	3	15.552	3	0.259
4	0.515			4	0.842			4	4.147			4	0.778	4	1.62	4	4.212	4	0.259	4	0.616	4	2.916	4	5.465	4	1.134	4	2.268	4	4.309	4	10.206	4	2.884
5	0.673			5	0.648			5	1.976			5	1.037	5	0.81	5	0.486	5	0.259	5	0.324	5	0.324	5	0.594	5	1.004	5	0.389	5	1.069	5	1.393	5	0.551
6	0.436			6	0.421			6	1.62			6	3.402	6	2.3	6	0.972	6	0.454	6	0.583	6	0.907	6	1.267	6	3.37	6	7.873	6	3.24	6	0.324	6	7.031
				7	0.583			7	1.264			7	0.324	7	0.421	7	47.012	7	0.259	7	0.875	7	0.324	7	0.356	7	0.421	7	0.713	7	0.259	7	0.454	7	0.292
								8	1.231			8	0.324	8	1.361	8	1.523	8	0.68	8	0.356	8	0.551	8	0.475	8	1.976	8	0.583	8	0.68	8	7.128	8	8.586
												9	0.907	9	0.616	9	0.259	9	0.713	9	0.389	9	0.842	9	0.436	9	1.037	9	11.534	9	0.324	9	0.68	9	0.292
												10	3.629	10	0.713	10	0.324	10	0.324	10	0.454	10	4.86	10	1.426	10	0.745	10	0.518	10	0.356	10	2.398	10	2.786
												11	0.259	11	0.421	11	0.454	11	0.421	11	0.259	11	1.847	11	1.742	11	0.745	11	0.259	11	0.94	11	0.389	11	1.847
												12	0.518	12	0.68	12	0.356	12	0.292	12	1.458	12	1.717	12	1.148	12	0.259	12	0.421	12	0.907	12	0.292	12	0.745
												13	0.875	13	0.745	13	43.222	13	0.356	13	0.292	13	0.68	13	0.436	13	0.324	13	0.259	13	0.259	13	1.328	13	0.583
												14	0.292	14	0.389	14	2.268	14	0.292	14	2.009	14	0.324	14	1.624	14	0.518	14	0.356	14	1.004	14	1.393	14	0.486
												15	1.231	15	4.795	15	0.616	15	5.702	15	1.231	15	1.102	15	0.792	15	0.324	15	3.337	15	0.356	15	5.962	15	0.713
												16	0.551	16	0.745	16	0.259	16	4.147	16	1.75	16	0.259	16	0.752	16	0.259	16	0.616	16	0.292	16	0.292	16	0.356
												17	0.454	17	0.648	17	0.324	17	0.81	17	0.324	17	3.305	17	1.505	17	0.421	17	0.454	17	1.199	17	0.259	17	0.583
												18	3.402	18	0.454	18	1.555	18	0.551	18	0.421	18	0.324	18	0.713	18	0.875	18	0.421	18	0.551	18	15.714	18	0.421
												19	1.912	19	0.616	19	1.037	19	7.128	19	0.292	19	0.875	19	0.713	19	1.426	19	0.292	19	0.486	19	1.231	19	1.75
												20	0.356	20	0.389	20	1.037	20	1.134	20	1.264	20	3.143	20	35.245	20	0.518	20	0.454	20	0.259	20	0.259	20	2.236
												21	0.292	21	1.037	21	1.393	21	0.518	21	0.68	21	1.004	21	1.386	21	0.356	21	3.985	21	0.421	21	0.259	21	0.616
												22	0.648	22	5.022	22	0.454	22	6.577	22	0.68	22	0.389	22	0.673	22	0.616	22	0.292	22	0.486	22	0.875	22	0.292
												23	31.428	23	0.259	23	2.462	23	1.426	23	0.454	23	0.583	23	0.356	23	10.886	23	0.875	23	1.069	23	1.069	23	0.454
												24	3.532	24	0.259	24	0.68	24	0.324	24	10.789	24	0.259	24	0.356	24	0.356	24	0.259	24	1.231	24	1.393	24	3.337
												25	0.486	25	0.486	25	12.96	25	0.356	25	0.356	25	3.337	25	0.554	25	0.292	25	1.879	25	0.324	25	1.555	25	0.389
												26	0.486	26	4.374	26	1.328	26	0.454	26	0.551	26	1.328	26	5.346	26	0.68	26	1.426	26	0.486	26	1.912	26	0.421
												27	3.143	27	0.292	27	2.268	27	3.11	27	0.713	27	1.199	27	1.109	27	13.446	27	0.389	27	0.518	27	0.292	27	0.389
												28	1.361	28	0.292	28	0.356	28	0.356	28	0.486	28	3.953	28	5.425	28	0.356	28	0.259	28	0.616	28	0.551	28	0.972
												29	0.259	29	0.648	29	0.292	29	0.389	29	0.292	29	0.972	29	1.267	29	0.583	29	0.713	29	0.259	29	1.264	29	1.328
												30	0.356	30	0.259	30	1.069	30	0.551	30	0.518	30	0.292	30	4.198	30	5.994	30	0.972	30	0.454	30	0.842	30	0.778
												31	0.616	31	0.745	31	0.324	31	17.788	31	0.583	31	0.842	31	0.752	31	0.68	31	0.454	31	6.415	31	0.324	31	1.328
												32	1.717	32	2.916	32	0.421	32	5.476	32	2.3	32	3.305	32	0.554	32	0.81	32	0.389	32	1.134	32	0.356	32	0.356
												33	1.134	33	2.171	33	0.421	33	0.259	33	1.458	33	2.657	33	0.594	33	0.616	33	0.68	33	0.616	33	1.102	33	4.99
												34	0.94	34	0.486	34	0.454	34	2.171	34	0.648	34	0.356	34	0.356	34	2.851	34	3.013	34	2.981	34	1.393	34	0.389
												35	0.551	35	1.523	35	3.758	35	1.328	35	0.81	35	1.102	35	0.554	35	0.875	35	0.518	35	0.778	35	9.979	35	0.324
												36	0.356	36	3.629	36	2.106	36	0.551	36	1.652	36	0.454	36	5.346	36	0.259	36	3.953	36	1.296	36	0.972	36	1.069
												37	5.281	37	0.259	37	0.81	37	0.259	37	0.389	37	5.022	37	0.752	37	0.324	37	0.389	37	0.486	37	2.041	37	0.713
												38	0.486	38	1.199	38	0.551	38	2.074	38	0.551	38	0.875	38	0.554	38	0.389	38	0.648	38	0.324	38	0.389	38	0.356
												39	0.745	39	0.907	39	0.259	39	1.588	39	2.009	39	0.389	39	1.861	39	0.356	39	0.518	39	0.259	39	0.778	39	0.259
												40	0.842	40	1.037	40	0.292	40	0.583	40	0.389	40	14.256	40	0.277	40	0.324	40	1.102	40	2.398	40	0.389	40	0.842
												41	0.875	41	2.074	41	1.588	41	0.778	41	0.324	41	1.588	41	0.871	41	0.324	41	0.259	41	0.68	41	2.43	41	0.486
												42	2.106	42	2.786	42	0.292	42	4.763	42	0.259	42	0.972	42	16.197	42	9.331	42	1.458	42	0.421	42	1.426	42	0.842
												43	0.324	43	6.091	43	0.389	43	0.745	43	1.328	43	0.713	43	1.663	43	0.454	43	0.713	43	0.842	43	0.616	43	0.778
												44	0.842	44	6.156	44	0.324	44	0.356	44	0.356	44	0.389	44	0.713	44	0.324	44	0.518	44	1.976	44	0.389	44	1.037
												45	0.518	45	0.421	45	0.259	45	0.454	45	0.389	45	0.875	45	1.188	45	2.3			45	0.94	45	3.402	45	0.68
												46	28.577	46	1.004	46	1.037	46	0.324	46	0.259	46	1.004	46	0.277	46	0.842			46	0.972	46	1.004	46	3.532
												47	4.244	47	0.745	47	2.527	47	0.972	47	0.389	47	5.378	47	0.594	47	0.389			47	3.272	47	0.421	47	0.292
												48	0.907	48	0.292	48	13.057	48	0.259	48	8.748	48	0.713	48	0.911	48	1.166			48	1.004	48	0.389	48	0.356
												49	9.072	49	0.778	49	0.518	49	1.069	49	0.259	49	0.356	49	1.188	49	1.361			49	5.443	49	0.713	49	1.879
												50	0.518	50	0.259	50	0.486	50	0.324	50	0.259	50	1.166	50	4.317	50	0.94			50	0.356	50	0.486	50	0.583
												51	0.324	51	3.856	51	1.037	51	0.616	51	0.972	51	0.551	51	0.594	51	0.94			51	1.328	51	1.847	51	0.972
												52	2.009	52	0.94	52	0.486	52	0.389	52	1.847	52	3.208	52	1.861	52	0.972			52	1.069	52	1.62	52	0.68
												53	1.912	53	0.518	53	0.259	53	0.421	53	0.356	53	0.583	53	0.99	53	0.518			53	0.259	53	3.402	53	0.324
												54	7.16	54	6.448	54	1.393	54	0.713	54	0.292	54	0.324	54	1.94	54	1.166			54	0.292	54	0.616	54	0.81
												55	0.356	55	2.138	55	12.928	55	1.296	55	0.356	55	27.443	55	0.475	55	0.259			55	2.819	55	0.389	55	0.356
												56	0.713	56	3.272	56	0.356	56	0.324	56	0.389	56	3.856	56	1.663	56	0.454			56	0.583	56	1.426	56	0.389
												57	1.426	57	0.713	57	0.292	57	0.356	57	0.421	57	5.8	57	0.792	57	0.356			57	0.259	57	0.421	57	1.361
												58	0.259	58	0.518	58	0.972	58	0.389	58	0.616	58	0.616	58	5.227	58	0.356			58	0.292	58	5.443	58	0.356
												59	7.906	59	0.259	59	0.454	59	3.272	59	23.911	59	0.454	59	0.356	59	0.713			59	0.259	59	2.916	59	1.361
												60	0.356	60	1.361	60	1.847	60	0.648	60	0.842	60	2.074	60	0.99	60	0.421			60	0.486	60	2.074	60	0.583
												61	1.296	61	0.356	61	0.745	61	0.324	61	0.68	61	0.356	61	0.317	61	0.68			61	2.106	61	0.486	61	6.156
												62	0.259	62	0.81	62	0.292	62	0.292	62	1.814	62	0.389	62	1.386	62	1.685			62	0.551	62	0.356	62	0.259
												63	0.389	63	0.778	63	0.292	63	2.398	63	2.041	63	0.842	63	1.228	63	0.616			63	1.426	63	0.583	63	1.037
												64	3.532	64	0.389	64	1.879	64	0.778	64	0.81	64	1.004	64	1.386	64	0.259			64	0.324	64	0.518	64	0.518
												65	2.009	65	8.132	65	1.782	65	0.324	65	0.324	65	10.53	65	0.356	65	0.292			65	0.356	65	0.583	65	4.212
												66	1.652	66	0.551	66	3.661	66	0.389	66	0.551	66	0.454	66	0.317	66	0.259					66	0.292	66	3.532
												67	0.389	67	0.551	67	5.152	67	1.361	67	6.156	67	0.356	67	0.277	67	0.356					67	0.259	67	1.037
												68	6.739	68	3.046	68	0.616	68	0.356	68	3.078	68	0.68	68	1.188	68	0.875					68	2.074	68	0.292
												69	0.616	69	6.415	69	0.389	69	0.713	69	2.786	69	0.389	69	1.822	69	0.324					69	0.259	69	0.81
												70	0.292	70	1.166	70	0.583	70	10.174	70	0.648	70	4.666	70	1.742							70	0.94	70	0.292
												71	0.324	71	1.166	71	0.486	71	0.616	71	3.629	71	1.199	71	4.713							71	0.486	71	1.134
												72	0.583	72	0.259	72	0.324	72	0.518	72	0.292	72	0.616	72	0.634							72	1.264	72	0.389
												73	1.037	73	0.842	73	2.009	73	3.11	73	2.009	73	0.259	73	2.336							73	0.551	73	0.616
												74	2.398	74	2.365	74	0.292	74	2.884	74	0.551	74	0.583	74	0.396							74	0.454	74	0.389
												75	5.378	75	2.462	75	0.324	75	0.259	75	0.389	75	0.81	75	7.049									75	0.356
												76	0.259	76	3.24	76	2.203	76	0.778	76	0.292	76	0.324	76	0.515									76	2.365
												77	0.713	77	0.648	77	0.389	77	2.786	77	0.518	77	2.43	77	3.524									77	0.259
												78	0.389	78	2.624	78	0.68	78	0.842	78	1.004	78	0.324	78	1.426									78	0.421
												79	0.324	79	0.454	79	0.842	79	0.356	79	0.356	79	0.583	79	6.93									79	0.907
												80	4.147	80	0.907	80	1.814	80	3.467	80	4.406	80	0.292	80	0.317									80	0.518
												81	0.324	81	0.421	81	0.421	81	0.292	81	0.842	81	0.842	81	0.277									81	0.518
												82	0.292	82	0.292	82	0.486	82	2.819	82	0.292	82	1.847	82	1.782									82	0.842
												83	3.661	83	0.486	83	1.523	83	0.518	83	0.324	83	3.046	83	1.148									83	0.259
												84	2.041	84	0.583	84	0.259	84	0.259	84	0.259	84	15.001	84	1.069									84	2.009
												85	0.745	85	0.324	85	0.259	85	0.324	85	0.389	85	2.43	85	3.168									85	0.421
												86	0.518			86	0.454	86	5.67	86	2.495	86	1.426	86	0.713									86	0.421
												87	1.102			87	0.778	87	0.583	87	0.324	87	0.356											87	0.778
												88	0.259			88	0.648	88	4.018	88	1.264	88	0.713											88	1.652
												89	0.518			89	1.231	89	1.004	89	0.875	89	0.648											89	1.328
												90	0.259			90	0.356	90	0.745	90	4.957	90	0.583											90	1.879
												91	0.389			91	1.037	91	0.259	91	0.259	91	0.713											91	1.199
												92	0.259			92	0.778	92	0.486	92	0.551	92	2.851											92	0.778
												93	0.842			93	0.81	93	2.56	93	1.426	93	0.454
												94	0.518			94	6.901	94	0.421	94	3.143	94	0.421
												95	1.912			95	10.919	95	0.518	95	0.356	95	0.486
												96	0.259			96	0.292	96	0.713	96	0.583	96	0.616
												97	1.588			97	0.454	97	4.471	97	0.842	97	2.365
												98	33.242			98	0.551	98	0.94	98	0.842	98	0.454
												99	1.004			99	0.454	99	0.583	99	0.454
												100	0.259			100	0.616	100	0.356	100	0.356
												101	8.942			101	1.231	101	4.957	101	0.778
												102	0.454			102	2.268	102	0.389	102	0.324
												103	0.583			103	0.356	103	2.624	103	0.616
												104	0.356			104	1.328	104	0.356	104	0.518
												105	9.04			105	18.922	105	1.814	105	0.259
												106	1.004			106	0.292	106	0.421	106	0.259
												107	0.259			107	8.294	107	0.259	107	2.106
												108	5.443			108	3.694	108	0.972	108	1.912
												109	0.454			109	1.458	109	2.819	109	0.616
												110	0.421			110	0.454	110	0.259	110	0.292
												111	7.711			111	9.04	111	0.292	111	0.875
												112	0.94			112	1.296	112	0.259	112	0.356
												113	8.327			113	0.421	113	1.588	113	0.745
												114	8.78			114	0.356	114	0.454	114	0.486
												115	9.817			115	0.389	115	0.324	115	0.324
												116	0.745			116	5.184	116	0.259	116	0.292
												117	0.842			117	1.847
												118	0.292			118	3.337
												119	0.421			119	1.069
												120	0.259			120	1.555
												121	0.259			121	0.551
												122	0.454			122	9.137
												123	1.328			123	0.518
												124	0.713			124	4.082
												125	2.754			125	0.292
												126	0.292			126	0.518
												127	1.944			127	1.685
												128	1.264			128	0.745
												129	9.234			129	6.221
												130	1.004			130	2.916
												131	0.616			131	2.268
												132	0.454			132	1.231
												133	2.884			133	0.648
												134	0.389			134	0.745
												135	10.174			135	2.56
												136	0.68			136	0.68
												137	1.62			137	1.847
												138	1.62			138	0.324
												139	0.259			139	0.389
												140	0.389			140	0.518
												141	0.421
6.456		0		3.531		0.778		19.245		0		345.577		131.899		358.411		172.075		149.428		193.075		256.528		132.026		62.629		74.062		151.247		107.761
P42 WT1		P42 WT2		P42 WT3		P42 WT4		P42 WT5		P42 WT6		P42 KO1		P42 KO2		P42 KO3		P42 KO4		P42 KO5		P42 KO6		P42 KI1		P42 KI2		P42 KI3		P42 KI4		P42 KI5		P42 KI6
1	3.049	0	0	1	0.454	0	0	0	0	0	0	1	1.296	1	0.583	1	5.962	1	1.004	1	0.745	1	3.856	1	3.089	1	1.685	1	0.259	1	0.292	1	0.259	1	0.356
2	0.317											2	0.292	2	0.421	2	6.253	2	1.782	2	0.616	2	1.134	2	1.03			2	0.842	2	0.324	2	0.389	2	1.069
												3	0.389	3	0.842	3	1.102	3	1.652	3	0.259	3	2.981					3	0.454	3	0.389	3	0.616	3	6.221
												4	0.292	4	5.897	4	0.259	4	0.616	4	4.277	4	5.54											4	0.356
												5	0.389	5	3.013	5	3.013	5	2.268	5	0.259	5	1.037											5	1.588
												6	0.486	6	1.069	6	2.333	6	1.004	6	0.324	6	3.532											6	1.102
												7	4.601	7	0.259	7	4.05	7	0.616	7	0.94	7	5.281											7	0.778
												8	3.564	8	0.583	8	3.694	8	1.49	8	0.454	8	0.292											8	2.884
												9	0.324	9	3.726	9	2.236	9	0.356	9	1.134	9	0.518											9	2.916
												10	0.518	10	0.324	10	1.231	10	1.037	10	0.583	10	3.402											10	1.588
												11	1.847	11	1.75	11	3.532	11	1.037	11	0.259	11	0.907											11	0.421
												12	2.916	12	1.004	12	0.518	12	0.745	12	0.421	12	3.013											12	0.907
												13	1.102	13	2.3	13	0.81	13	1.134			13	1.231
												14	0.778	14	3.791	14	0.551	14	0.486			14	0.486
												15	1.361	15	0.389			15	2.495			15	0.551
												16	0.421	16	0.875			16	2.657			16	0.356
												17	0.259	17	1.166			17	1.199			17	0.324
												18	2.884	18	0.583			18	2.916			18	0.875
												19	0.486	19	1.296			19	1.588			19	1.069
												20	0.454	20	0.875			20	0.356			20	0.324
												21	1.393	21	0.583			21	1.231			21	1.717
												22	0.454	22	4.212			22	0.486			22	1.264
														23	0.745			23	0.356			23	5.346
														24	0.324							24	1.264
																						25	1.426
																						26	6.253
																						27	0.486
																						28	3.013
																						29	0.259
																						30	0.778
																						31	1.426
																						32	0.875
																						33	0.518
																						34	0.842
																						35	6.448
																						36	0.518
3.366		0		0.454		0		0		0		26.506		36.61		35.544		28.511		10.271		69.142		4.119		1.685		1.555		1.005		1.264		20.186
P42 WT1		P42 WT2		P42 WT3		P42 WT4		P42 WT5		P42 WT6		P42 KO1		P42 KO2		P42 KO3		P42 KO4		P42 KO5		P42 KO6		P42 KI1		P42 KI2		P42 KI3		P42 KI4		P42 KI5		P42 KI6
1	2.257	0	0	1	0.292	1	0.486	1	4.212	0	0	1	0.259	1	0.356	1	0.583	1	2.722	1	0.81	1	11.048	1	1.069	1	0.648	1	1.037	1	0.259	1	0.421	1	0.389
2	0.832			2	3.402			2	1.912			2	8.197	2	0.518	2	0.259	2	12.442	2	23.101	2	6.642	2	0.792	2	0.389	2	2.138	2	0.421	2	0.583	2	0.292
3	0.356			3	0.454			3	1.588			3	0.583	3	0.324	3	0.259	3	1.296	3	0.421	3	0.292	3	0.317	3	12.992	3	0.259	3	0.292	3	0.68	3	0.356
				4	0.324			4	0.745			4	3.467	4	0.356	4	0.583	4	0.421	4	11.729	4	0.259	4	0.356	4	4.698	4	0.551	4	0.292	4	0.259	4	0.324
				5	1.652			5	0.389			5	36.709	5	0.259	5	0.259	5	8.392	5	0.94	5	0.259	5	0.713	5	1.426	5	0.486	5	0.389	5	0.454	5	2.819
				6	0.778			6	0.324			6	1.231	6	0.972	6	0.616	6	0.389	6	95.353	6	2.948	6	0.634	6	2.592	6	0.81	6	11.178	6	3.046	6	19.375
				7	0.356							7	0.518	7	0.259	7	0.81	7	0.454	7	1.296	7	0.259	7	1.109	7	0.583	7	0.324	7	0.94	7	0.292	7	8.683
												8	18.338	8	0.875	8	0.616	8	11.34	8	0.389	8	21.287	8	0.356	8	1.588	8	0.389	8	2.333	8	4.73	8	1.328
												9	0.648	9	0.259	9	0.292	9	33.599	9	12.96	9	28.285	9	1.109	9	0.972	9	0.292	9	1.264	9	0.68	9	1.361
												10	19.796	10	0.421	10	0.454	10	5.281	10	9.072	10	0.616	10	0.792	10	0.356	10	0.583	10	1.458	10	0.486	10	2.203
												11	2.722	11	0.356	11	0.292	11	12.798	11	10.433	11	1.49	11	0.673	11	0.842	11	0.81	11	3.046	11	10.822	11	0.551
												12	6.836	12	1.62	12	5.378	12	7.452	12	13.381	12	0.389	12	0.594	12	1.166	12	0.259	12	4.082	12	5.929	12	4.018
												13	8.392	13	0.842	13	0.259	13	2.398	13	0.616	13	2.203	13	24.79	13	1.847	13	2.009	13	1.685	13	7.906	13	3.791
												14	7.614	14	1.166	14	0.583	14	7.97	14	14.321	14	1.296	14	0.634	14	0.292	14	0.421	14	0.778	14	7.387	14	0.356
												15	0.356	15	0.259	15	3.078	15	0.292	15	3.305	15	14.483	15	0.277			15	0.518	15	5.184	15	0.292	15	0.81
												16	16.621	16	0.356	16	6.35	16	7.29	16	27.734	16	0.745	16	0.317			16	1.393	16	1.685	16	4.633	16	0.907
												17	39.01	17	3.856	17	0.292	17	1.458	17	2.981	17	0.324	17	1.822			17	3.143	17	2.981	17	4.633	17	1.166
												18	1.555	18	2.171	18	39.625	18	0.68	18	0.518	18	2.56	18	8.673			18	0.356	18	0.356	18	3.661	18	3.953
												19	16.945	19	0.454	19	2.138	19	0.68	19	0.972	19	15.034	19	0.356			19	3.499	19	0.454	19	0.486	19	3.078
												20	2.592	20	0.551	20	0.81	20	0.518	20	0.907	20	0.583	20	0.277			20	4.892	20	1.685	20	1.458	20	2.462
												21	0.648	21	0.94	21	24.559	21	3.791	21	2.074	21	13.057	21	0.317			21	0.648	21	2.43	21	1.231	21	1.685
												22	1.879	22	33.145	22	3.856	22	4.633	22	0.648	22	3.078	22	7.841			22	1.037	22	1.231	22	1.75	22	2.56
												23	1.426	23	0.454	23	1.004	23	7.063	23	2.722	23	0.486	23	1.663			23	1.102	23	1.037	23	0.259	23	0.616
												24	7.452	24	2.171	24	0.616	24	1.328	24	1.814	24	1.296	24	0.277			24	1.555	24	0.648	24	0.713
												25	0.713	25	13.381	25	19.958	25	0.551	25	1.199	25	30.618	25	4.554			25	0.486	25	1.555	25	0.292
												26	0.842	26	24.786	26	17.496	26	0.81	26	0.518	26	1.166	26	1.663					26	1.199
												27	1.49	27	0.421	27	0.389	27	21.06	27	0.583	27	24.818							27	0.68
												28	0.583	28	16.589	28	7.841	28	0.486	28	0.94	28	1.782
												29	0.778	29	27.799	29	11.405	29	24.43	29	0.259	29	14.159
												30	2.236	30	0.454	30	8.165	30	10.886			30	7.225
												31	1.231	31	0.81	31	15.034	31	16.362			31	18.209
												32	0.292	32	9.169	32	14.062	32	17.95			32	0.356
														33	0.356	33	1.912	33	29.225			33	0.292
														34	0.356	34	0.421	34	0.81			34	3.37
														35	11.405	35	3.823	35	1.264			35	0.648
														36	15.746	36	6.934	36	0.745			36	8.262
														37	8.554	37	0.356	37	29.322			37	1.166
														38	0.259	38	1.166	38	4.471			38	1.426
														39	1.588	39	0.324	39	1.134			39	0.454
														40	0.389	40	5.378	40	12.247			40	2.074
														41	3.564	41	3.629	41	0.356			41	0.421
														42	0.583	42	1.782	42	1.328			42	0.389
														43	1.102	43	1.264	43	10.724			43	28.447
														44	18.338	44	0.551	44	25.304			44	2.624
														45	0.259	45	1.652	45	1.166			45	1.976
														46	3.985	46	0.486	46	1.523			46	2.462
														47	0.81	47	0.324	47	0.421			47	10.109
														48	10.757			48	6.869			48	3.337
														49	1.004			49	0.583			49	0.292
														50	2.657			50	0.259			50	2.009
														51	1.166			51	4.147			51	5.054
														52	2.009			52	3.337			52	6.026
														53	1.037			53	1.75			53	0.551
														54	4.244			54	3.305			54	6.415
														55	0.68			55	0.94			55	1.037
														56	0.972			56	0.389			56	0.778
														57	1.393			57	0.389			57	1.976
														58	0.94			58	2.041			58	2.074
																		59	0.907			59	2.657
																		60	2.3			60	0.81
																		61	0.259			61	0.292
																		62	1.166
																		63	0.907
																		64	0.583
																		65	0.842
3.445		0		7.258		0.486		9.17		0		211.959		240.502		217.923		378.235		241.996		324.68		61.975		30.391		28.997		49.542		63.083		63.083
