# Supplementary material for: A dual role for Cav1.4 Ca2+ channels in the molecular and structural organization of the rod photoreceptor synapse
Source: eLife journal article supplement (doi:10.7554/elife.62184), 2020-09-17
Supplement: fig4-figsupp2-data1 [file Nearest neighbor data.xlsx]

## Sheet: Sheet1
P42 WT1	P42 WT2	P42 WT3	P42 WT4	P42 KO1	P42 KO2	P42 KO3	P42 KO4	P42 KI1	P42 KI2	P42 KI3	P42 KI4
1.67167	2.18624	0.723038	5.27255	0.0876812	0.175362	0.062	0.124	0.451367	2.06993	0.599907	0.843291
1.49977	0.750189	0.605591	0.642548	0.0876812	0.20939	0.138636	0.248	0.0876812	0.426882	0.124	0.218376
1.7433	0.729405	0.62	1.04782	0.243352	0.20939	0.218376	0.438406	0.277272	0.512788	0.316139	0.299953
2.70141	0.610629	0.447088	0.196061	0.280071	0.218376	0.223544	0.444527	0.330442	0.138636	0.638329	0.436752
1.81384	0.647299	0.753302	1.72113	0.299953	0.235321	0.223544	0.610629	0.196061	0.31	0.2	0.389199
2.57625	0.746579	0.566226	0.780328	0.318597	0.235321	0.31	0.660969	0	0.280071	0.526087	0.235321
0.95931	0.396994	0.438406	1.38449	0.330442	0.299953	0.318597	0.663786	0.062	0.440182	0.255633	0.372
1.2144	0.562821	0.705963	0.849249	0.341877	0.31	0.330442	0.857963	0.196061	1.17554	0.647299	0.280071
1.63404	0.413154	0.47874	3.80227	0.350725	0.324574	0.474708	0.880364	0.377131	0.265992	0.218376	0.447088
1.22126	0.961486	0.815483	4.73294	0.389199	0.377131	0.566226	0.922995	0.138636	0.780328	1.56849	0.571612
0.928952	1.5122	0.223544	0.830646	0.389199	0.389199	0.603195	1.01196	0.138636	18.1366	1.21811	0.186
1.71329	2.02486	0.593464	0.851018	0.438406	0.403742	0.647299	1.11772	0.138636	13.0689	0.772904	0.440182
0.737835	2.19988	0.737835	2.0939	0.486703	0.404776	0.697668	1.18693	0.368917	12.2105	0.426882	0.62808
1.68531	0.324574	0.638329	0.605591	0.493692	0.436752	0.711309	1.25603	0	2.01822	0.415909	0.389199
3.58369	0.548992	0.677492	0.684812	0.529728	0.458227	0.723038	1.36118	0.368917	13.2736	0.175362	0.31
1.63977	0.409497	0.523912	0.561434	0.538386	0.472178	0.734656	1.44428	0.663786	1.24372	0.316139	5.4804
1.07832	0.649147	1.6984	0.529728	0.647299	0.484235	0.753302	1.48864	0.418779	1.36769	1.26365	0.318597
0.584907	0.561434	0.584907	0.512788	0.788284	0.539162	0.771028	1.51946	0.418779	0.94968	0.562821	0.746579
2.60003	1.29404	0.689353	0.821338	0.800312	0.593464	0.789131	1.52954	0.196061	1.41873	0.389199	0.438406
2.39412	0.788284	1.12735	0.589508	0.811924	0.621257	0.809345	1.93635	0.062	3.51361	0.196061	0.434
0.737835	1.07592	0.529728	0.830443	0.812231	0.663786	0.830646	2.11619	0.277272	0.605591	0.80219	0.666675
3.03002	0.753302	0.688747	0.70145	0.830443	0.693181	0.871651	2.13212	0.955791	0.538386	0.438406	9.29894
2.65514	0.558	0.814081	0.341877	0.832754	0.706909	0.881186	2.14291	0.49986	0.436752	0.706909	0.196061
1.65191	1.64171	0.659069	0.243352	0.837924	0.788284	0.91225	2.17231	0	0.915419	0.20939	0.316139
1.5631	0.846983	0.682	0.659069	0.916271	0.814081	0.963801	2.34382	0.361519	0.529728	0.723038	1.2394
1.07832	0.62	0.62	0.438406	0.943146	0.815483	1.01688	2.65853	0.138636	0.341877	1.21756	0.440182
1.8178	0.670633	0.711309	1.45192	0.987384	0.818789	1.05701	2.70002	0.512788	0.368917	0.440182	0.413154
1.80909	0.800312	0.341877	0.451367	1.01213	0.823675	1.06875	3.00064	0	3.1632	0.447088	0.737835
1.98291	0.856012	0.566226	0.749149	1.054	0.871651	1.08278	3.00426	0.506063	0.413154	0.533344	0.623092
0.688747	0.512788	0.59276	0.856077	1.06875	0.890744	1.1067	3.02436	0.255633	0.374091	0.223544	0.506063
1.5922	0.538386	0.593464	0.481871	1.10587	0.89986	1.11797	3.09351	0.196061	0.330442	0.477866	0.196061
3.40235	0.56961	0.554545	0.418779	1.15934	0.937012	1.12994	3.20975	0.31	0.484235	4.23344	0.458227
2.38106	0.753302	0.548992	0.512788	1.17637	0.9578	1.21756	3.5154	0.418779	0.277272	0.780935	0.248
2.41039	0.828698	0.721457	0.512788	1.22046	0.973721	1.23908	3.52564	0.458227	0.853763	4.41926	0.175362
1.69613	0.444527	0.697668	0.458227	1.25603	1.00475	1.25616	3.61551	0.218376	0.734656	6.76922	1.08566
0.782787	0.928952	0.780935	0.603102	1.34185	1.01427	1.27758	3.71342	0.186	0.963743	6.30914	1.13547
1.62168	0.642548	0.766898	1.24773	1.40768	1.07413	1.39689	3.81805	0.640203	0.723038	1.7203	0.422355
2.36624	0.693181	0.605591	0.864946	1.48527	1.07856	1.46011	4.02886	1.05838	0.734656	1.16239	1.30348
1.30811	0.734656	0.481871	1.60681	1.49266	1.09453	1.52677	4.06556	0.062	0.649233	0.831817	7.76038
3.22665	1.05854	0.780864	0.361519	1.54937	1.09978	1.53114	4.24988	1.11498	0.837924	0.605591	0.20939
2.65514	1.26396	0.538386	0.683754	1.65221	1.1011	1.53837	4.29061	0.196061	15.261	1.09425	0.330442
1.62287	0.647299	0.415909	0.595993	1.6574	1.11363	1.62287	4.76047	0.223544	0.560143	0.529728	1.08528
1.51819	0.571612	0.621257	0.808381	1.70405	1.13139	1.62683	4.80229	0.223544	0.593464	0.324574	0.697068
0.725691	0.677492	0.780935	1.29849	1.73091	1.20766	1.66129	4.87909	1.93694	0.563564	1.29778	0.330442
2.02388	0.444527		0.493692	1.79709	1.20925	1.66767	4.97312	0.697068	0.415909	0.897722	0.062
1.23766	0.828698		0.953281	1.817	1.23066	1.69963	5.19525	0.538386	1.63097	0.277272	1.35905
2.28258	0.812231		1.27124	1.82294	1.24076	1.73007	5.24746	0.368917	1.18714	6.43656	0.512788
0.782787	0.876812		0.846983	1.91011	1.28065	1.77585	5.43033	0.2	0.509847	0.31	0.299953
0.538386	0.523912		2.95041	1.94994	1.30348	1.86683	5.55	0.0876812	0.33388	3.77889	0.631221
0.577044	0.618155		0.973663	1.97028	1.30439	1.87019	5.58089	0.243352	1.90735	0.811924	0.426882
2.34854	0.770955		0.423344	2.00271	1.3747	1.94744	5.6002	0.20939	18.0411	0.196061	2.31476
2.43945	0.793075		0.70868	2.02475	1.37753	1.94967	5.63464	0.138636	0.444527	0.447088	0.33388
0.677492	0.392122		0.489784	2.06415	1.39878	1.95536	5.91116	0.280071	1.33358	0.877893	0.223544
0.659069	0.899333		0.862786	2.07271	1.43606	1.97515	5.99795	0.56961	2.17874	0.255633	2.18624
0.908302	0.31		0.445466	2.17762	1.5324	2.04694	6.06063	0.800312	0.554545	0.584907	0.374091
0.621257	1.7995		0.668927	2.22045	1.55823	2.13382	6.11401	0.196061	0.901931	1.01213	3.49714
0.918549	0.95748		0.62808	2.23149	1.56221	2.16789	6.18562	0.538386	0.248	4.3725	0.652187
0.752747	0.760918		0.299953	2.27124	1.56684	2.22954	6.20567	0.20939	0.970454	0.196061	0.628169
0.775386	1.70469		0.138636	2.29538	1.57784	2.25683	6.27702	0.316139	0.4	0.780864	1.6114
0.939566	0.588184		2.6728	2.64783	1.60052	2.28467	6.33476	0.0876812	0.368917	0.218376	8.37565
1.84875	0.461498		0.605591	2.6558	1.63625	2.39795	6.57317	0.263044	0.493692	0.20939	0.593464
0.826307	1.22463		0.815483	2.66212	1.65507	2.60003	6.59291	0.389199	0.20939	0.341877	0.248
1.32309	0.812231		0.324574	2.74879	1.72767	2.63492	9.90937	0.445466	12.3037	0.389199	0.49986
1.05154	0.56961		0.853763	2.75021	1.73337	2.65145	14.2227	0.124	0.248	0.368917	0.750189
1.64171	0.299953		0.62808	2.95493	1.73337	2.6914		0.523912	0.925075	0.965793	0.539162
1.6092	0.893087		0.316139	2.98666	1.74594	2.81715		0.218376	0.445466	0.489784	0.186
2.35314	3.5641		0.548992	3.03712	1.75735	2.9045		0.20939	0.263044	0.318597	0.666675
1.37312	1.15934		1.51286	3.23291	1.80931	2.98593		0.837924	0.318597	0.509847	0.65146
1.5769	0.832754		1.01237	3.37066	1.81343	2.99925		0.235321	0.318597	0.426882	0.426882
2.52218	0.588184		0.4	3.5931	1.82189	3.25285		1.01904	0.341877	0.444527	1.843
0.684812	0.666675		0.506063	3.63791	1.84807	3.26995		0.243352	1.12735	0.538386	0.562821
0.593464	0.610629		0.440182	4.20225	1.87184	3.2931		0.418779	0.447088	0.243352	0.186
1.49266	0.729978		0.599907	4.26292	1.89226	3.33716		0.223544	0.20939	0.186	0.506063
0.711309	0.753302		0.593464	4.83935	1.91313	3.35653		0.808381	0.788284	4.80022	0.175362
0.737835	0.924623		0.823675	4.91582	1.91862	3.39936		0.330442	0.138636	0.486703	0.280071
2.16608	0.697068		0.413154	5.02678	1.95174	3.69831		0.124	12.8501	0.817019	0.20939
2.18376	0.753302		1.02932	6.48096	2.02846	3.87717		0.062	14.1958	0.511265	0
0.684812	1.66496		0.618831	6.60045	2.10618	3.89317		0.392122	1.01213	6.36178	0.418779
1.72669	0.66776		0.65146	6.64249	2.11747	3.96824		0.273123	1.18192	5.45094	0.458227
0.782787	0.730055		0.800312	6.86399	2.13441	4.1491		0.341877	2.35108	0.916788	0.377131
1.75188	1.66551		0.368917	6.87122	2.16557	4.17675		0.0876812	0.265992	0.299953	8.28042
0.554545	0.688747		0.640203	7.70109	2.22153	4.21559		0.916454	1.71763	2.05482	1.178
0.566226	0.792548		1.01243	7.76858	2.27095	4.27574		0.925075	1.34185	0.983229	0.748257
1.88326	0.642548		0.752747	8.72476	2.32347	4.3887		0.549753	0.418779	0.993936	0.2
3.99799	0.62808		0.772904		2.33435	4.51082		0.280071	0.697668	0.577044	0.62808
2.37548	0.642548		0.563564		2.40217	4.59278		0.509847	0.618831	0.534805	1.67586
0.65146	1.31319		0.124		2.40734	4.79876		0.368917	3.51361	0.389199	0.415909
1.59298	0.605591		0.70868		2.4171	4.82147		0.299953	0.265992	1.05109	0.809345
0.605591	0.533344		0.426882		2.43145	4.92057		0.20939	1.49958	0.534805	4.29996
0.846688	0.613769		0.255633		2.53259	5.00431		0.243352	0.434	1.65898	1.32686
0.637194	0.780935		0.721457		2.57645	5.13652		0.538386	1.13164	0.589508	0.881186
2.04118	0.721457		0.62		2.65618	5.21592		0.277272	0.554545	0.851018	0.299953
1.37452	0.65146		0.828698		2.73334	5.40289		0.861332	12.3403	0.418779	0.235321
0.693181	0.80219		0.396994		2.77056	5.40491		0.403742	0.806	0.474708	0.409497
0.980306	0.849249		1.07281		2.78133	5.68915		0.255633	0.277272	0.447088	0.138636
1.81015	0.812231		0.533344		2.93803	8.98783		0.196061	0.489784	1.01427	0.538386
2.30955	0.539162		0.743102		2.96757	9.54661		0.138636	0.361519	0.368917	0.603102
2.6944	0.663786		0.595993		2.96757	12.5007		0.589508	0.389199	0.438406	0.368917
1.87175	0.496		0.618155		2.97826	12.7684		0.248	0.599907	0.389199	0.20939
0.69982	0.603102		1.24372		2.98495	15.4988		0.521034	2.38471	4.76089	0.0876812
2.28195	0.62		0.413154		3.09717			0.828698	0.299953	0.404776	1.46783
1.18451	0.577044		1.08528		3.1066			1.77649	0.732606	0.434	0.277272
1.78513	0.790648		0.538386		3.15905			0.20939	0.780328	0.566226	0.588184
1.87483	0.59276		0.740511		3.19791			3.46956	0.451367	0.377131	0.372
0.922995	0.668927		0.721457		3.20067			0.683754	17.2135	1.32889	3.02572
0.857767	0.69982		0.928952		3.24931			0.413154	1.63052	1.49142	1.64171
1.72224	0.523912		0.481871		3.2776			0.263044	0.318597	0.558	1.6913
0.853763	0.534805		0.389199		3.35325			0.403742	1.07677	5.67329	0.062
0.62808	0.654404		0.697668		3.37695			0.788284	0.263044	1.322	0.138636
0.647299	1.01213		0.800312		3.38504			0.124	0.341877	0.737835	0.4
1.63436	0.721457		0.0876812		3.44315			0.280071	1.63447	0.512788	0.20939
2.01245	0.484235		1.18451		3.4505			0.196061	0.255633	4.8051	0.62808
1.19122	0.697668		0.631221		3.53488			0.255633	0.423344	7.11848	0.65146
1.2062	0.889053		0.561434		3.5833			0.33388	0.4	0.138636	0.20939
0.711309	0.509847		0.511265		3.5847			0.0876812	0.640203	1.25789	0.138636
0.812231	0.549753		0.534805		3.59413			0.255633	1.39258	0.33388	1.15727
0.489784	0.593464		1.01953		3.65374			0.481871	0.368917	0.243352	0.368917
0.618155	1.4208		0.753302		3.67093			0.263044	3.35792	0.377131	4.39439
2.13518	0.481871		0.832754		3.68632			0.255633	0.422355	0.277272	0.372
0.734656	0.65146		0.693181		3.83193			0.44113	0.186	0.33388	0.404776
0.554545	0.49986		0.523912		3.843			0.973663	0.677492	0.496	0.415909
1.53316	0.548992		0.884247		3.85199			0.372	0.603102	0.618155	0.318597
0.812231	0.618155		0.663786		3.93663			0.138636	0.413154	0.255633	0.0876812
0.983229	0.663156		0.418779		3.94433			0.566226	0.512788	0.886418	0.49986
1.69183	0.566226		0.263044		4.00876			0.186	0.531985	0.640203	0.438406
0.734656	0.472178		1.71753		4.10304			0.368917	0.566226	1.0005	0.277272
0.521034	0.734656		0.539162		4.14543			2.29073	3.87842	9.13369	1.99284
1.8265	0.548992		0.509847		4.25303			0.31	0.33388	0.243352	0.638329
1.45984	0.610629		0.948418		4.26605			0.31	0.606373	0.377131	0.062
2.62355	0.588184		0.688747		4.39173			0.235321	2.1188	0.415909	0.196061
0.562821	1.62565		0.771028		4.42273			0.440182	11.7421	0.330442	0.447088
1.42789	0.918549		0.138636		4.47427			0.403742	0.595993	0.196061	0.255633
1.79907	0.605591		0.423344		4.50327			0.341877	0.828698	1.2663	0.273123
0.886418	0.484235		0.496		4.52068			0.523912	0.809345	0.299953	0.062
0.56961	0.756806		0.584907		4.57792			0.374091	0.392122	0.618831	0.341877
0.99972	0.529728		0.418779		4.66552			0.812231	1.43606	5.96946	0.486703
0.590217	0.62808		0.404776		4.73617			0.640203	0.800312	1.37749	0.277272
1.36751	0.59276		0.31		4.88644			2.20087	0.196061	5.47551	0.752747
2.1492	0.647299		0.618155		5.23346			0.341877	4.28792	0.243352	0.196061
1.24094	0.560143		0.959804		5.5571			0.436752	0.802399	0.493692	0.138636
3.31781	0.688747		0.33388		5.83047			0.562821	1.04231	4.77798	0.444527
1.94547	0.62		0.330442		5.86269			0.445466	0.472178	0.243352	0.062
0.62	0.770955		0.062		6.47476			0.512788	0.538386	0.760918	0.70868
0.663786	0.688747		3.88359		7.0109			0.235321	0.49986	1.47096	0.186
0.589508	0.477866		0.20939		7.21004			0.341877	0.588184	0.341877	0.062
0.832754	0.792548		0.800312		10.0714			0.175362	2.71068	0.324574	0.361519
1.68873	0.677492		0.481871					0.752747	0.243352	1.32126	0.235321
0.792548	0.472178		1.19646					0.361519	0.31	0.299953	0.138636
0.856012	1.32919		0.49986					0.324574	13.3551	0.196061	0.80219
0.68656	0.862786		0.324574					0.196061	11.4519	0.56961	0.797977
1.56066	1.05854		0.793987					0.062	1.25603	0.708601	0.361519
0.743102	0.9578		0.470642					0.9578	0.440182	0.447088	1.75926
0.721457	1.096		0.512788					1.75131	0.49986	0.884247	2.76897
0.688747	0.817019		0.71342					0.263044	0.56961	0.877893	0.95748
0.83965	0.666675		0.138636					0.477866	0.273123	0.280071	0.534805
2.35181	1.58149		0.748257					0.440182	0.415909	0.640291	0.062
0.866683	0.753302		1.03029					0.31	1.25022	0.447088	0.263044
0.80219	0.780935		0.554545					1.07682	0.341877	0.445466	0.0876812
0.740511	1.1676		0.730055					0.865011	0.932064	0.263044	0.426882
0.638329	0.770413		0.562821					0.440182	0.444527	4.14014	0.243352
1.48735	0.605591		1.18451					0.124	0.734656	0.69982	1.19486
1.58755	0.732606		0.590217					0.793075	3.45618	0.426882	0.138636
0.538386	0.62		0.603102					0.843291	6.11478	0.649147	0.235321
1.00641	0.588184		0.512788					0.748257	3.28634	0.697068	0.538386
0.66776	0.638329		0.481871					0.561434	5.19599	7.67606	3.93486
1.56835	1.30811		0.196061					0.280071	1.3912	0.138636	0.248
0.637194	0.451367		0.987441					0.668927	0.445466	0.566226	0.374091
0.82171	0.806		0.218376					1.69227	0.640203	0.678192	0.413154
0.772904	0.590217		0.062					0.649147	0.740511	1.03496	0.175362
0.86356	0.603102		0.413154					0.472178	13.3875	0.776858	0.138636
1.22463	0.623092		0.589508					0.280071	0.0876812	2.07066	0.255633
0.566226	1.31522		0.793075					0.0876812	0.688747	1.23946	0.389199
0.953281	0.571612		0.595993					0.477866	1.07592	1.19199	0.571612
0.828698	0.91225		0.640291					0.299953	0.243352	0.640203	0.493692
2.56414	0.697668		0.341877					0.377131	0.223544	0.812231	0.318597
1.27688	0.686641		0.531985					0.62	0.413154	0.561434	0.83985
0.49986	0.632278		0.413154					0.4	0.175362	0.434	0.31
1.52299	1.23753		0.413154					0.20939	0.324574	0.196061	0.175362
0.512788	0.62		2.08752					0.196061	0.196061	0.20939	0.409497
0.659069	0.719447		0.603102					0.341877	1.63875	0.577044	0.663156
0.830443	0.992955		0.732606					0.124	0.361519	0.280071	0.392122
0.746579	0.506063		1.7524					0.324574	0.753302	0.403742	4.88678
1.00384	0.595993		0.632278					0.461498	0.324574	0.235321	0.618155
1.65507	0.49986		0.618831					0.474708	0.916454	0.33388	0.316139
0.605591	0.66776		0.413154					0.138636	0.235321	0.368917	0.423344
1.35213	0.83985		0.884247					0.9578	0.299953	0.389199	8.11298
0.638329	0.706909		0.682					0.062	1.03652	0.196061	0.423344
0.961486	0.438406		0.273123					0.631221	2.54929	0.792548	0.20939
0.595993	2.27971		0.451367					0.273123	0.749149	0.780864	0.529728
0.746579	0.830443		0.790648					0.523912	0.922995	1.60172	2.77195
0.688747	0.529728		0.660969					0.937012	0.440182	0.330442	2.32964
0.69982	2.30861		0.470642					0.621257	0.436752	0.218376	0.235321
0.892899	1.58251		0.243352					0.124	0.56961	1.08304	0.277272
1.26531	0.561434		0.255633					0.792548	0.521034	0.780864	0.374091
0.705963	1.87072		4.76819					0.20939	1.96415	0.554545	1.36118
0.549753			0.496					0.66776	1.17333	0.649147	0.33388
0.856012			0.426882					0.474708	0.857963	0.223544	2.90844
0.640203			0.218376					0.062	0.458227	0.87605	0.445466
2.02631			0.196061					0.243352	0.299953	0.426882	0.716771
0.62808			0.472178					0.458227	0.56961	0.426882	0.062
0.693181			0.546245					0.218376	0.892899	2.05669	0.887705
1.88858			0.610629					0.481871	0.422355	3.71875	0.263044
1.01213			0.426882					0.529728	0.316139	0.506063	0.404776
1.90983			0.612679					0.470642	0.368917	0.477866	0.422355
1.55309			0.20939					0.426882	0.599907	0.571612	0.871651
0.523912			0.318597					1.70909	0.138636	3.21139	0.265992
0.49986			0.812231					0.341877	7.09693	0.218376	0.623092
0.589508			0.862786					0.138636	11.4464	0.686641	2.36529
0.659069			0.512788					0.754263	0.426882	1.04782	0
0.734656			0.991326					0.403742	1.84196	0.44113	0.0876812
1.58663			0.0876812					0.474708	0.711309	0.280071	0.444527
0.987384			1.33496					0.486703	0.708601	0.426882	4.47113
0.749149			0.374091					0.800382	0.998995	0.526087	0.862786
1.22463			1.13731					0.396994	0.341877	0.461498	7.57692
1.39964			0.438406					0.389199	1.42936	1.09951	0.549753
0.752747			0.511265					0.808381	0.444527	1.89684	0.404776
1.01904			0.856077					1.11772	0.496	0.377131	0.916788
0.800312			1.2144					0.263044	1.53831	0.316139	0.235321
0.605591			0.821338					0	0.49986	0.330442	0.218376
0.688747			1.55823					0.493692	0.2	0.944356	0.511265
1.01427			0.33388					0.748257	0.426882	1.5017	0.235321
0.584907			0.873503					0.493692	0.493692	0.31	0.263044
0.631221			0.652187					0.423344	0.493692	0.33388	0.884437
1.27124			0.590217					0.444527	0.404776	0.686641	0.723038
0.675352			0.654404					0.438406	8.87262	0.445466	0.621257
1.44428			0.368917					0.31	9.87309	9.09886	0.44113
0.640291			0.243352					3.36314	0.196061	0.223544	0.69982
1.73366			0.746579					0.196061	0.444527	0.243352	0.255633
1.45485			0.70868					0.124	0.818995	0.196061	1.37871
0.721457			0.436752					0.20939	0.235321	0.280071	1.21201
0.49986			2.28654					0.124	0.265992	0.20939	0.277272
0.857767			2.17528					0.409497	0.243352	0.377131	0.916271
1.6092			0.138636					0.138636	0.248	0.413154	0.686641
0.775386			0.20939					0.374091	0.341877	0.675352	0.235321
0.721457			0.447088					0.361519	0.31	0.324574	0.780328
1.00475			0.962499					0.175362	0.461498	0.273123	8.69678
0.610629			0.56961					0.175362	0.637194	0.248	0.20939
0.800312			0.599907					0.316139	0.595993	1.45621	0.881186
0.891275			0.512788					0.175362	0.918549	0.49986	0.481871
0.688747			0.2					2.40491	1.0005	0.389199	0.20939
1.02253			0.277272					0.571612	0.341877	2.4064	0.299953
0.561434			0.511265						1.20246	2.70259	0.415909
0.697668			0.31						1.68531	0.265992	0.196061
1.58918			1.07281						16.5879	0.368917	0.273123
0.642548			0.374091						0.65146	0.566226	0.857767
0.642548			0.770413						0.640203	0.589508	0.0876812
1.576			0.640203						1.01237	0.538386	0.196061
1.23401			1.72378						0.0876812	0.243352	0.486703
1.8882			0.603102						0.235321	0.697668	0.124
0.70145			0.660884						0	0.776858	0.426882
0.588184			0.59276						0.374091	1.208	2.75156
0.734656			0.218376						0.618831	0.196061	2.81597
1.30348			0.062						0.840214	0.196061	0.474708
0.595993			0.223544						0.436752	0.396994	1.25387
0.682			0.404776						0.549753	0.87605	1.11498
0.837924			0.640203						0.632278	0.654404	0.377131
0.857767			0.33388						17.627	0.566226	0.299953
0.778398			0.474708						0.697068	0.196061	0.800382
1.11772			1.79013						0.44113	0.780328	0.062
1.01953			2.12129						0.368917	0.389199	0.477866
0.909956			0.438406						0.434	0.563564	0.754263
2.45832			0.663156						0.637194	0.523912	7.73053
2.027			0.423344						0.277272	0.458227	6.28288
0.89986			0.20939						0.299953	0.368917	2.05879
0.605591			0.389199						0.403742	0.361519	0.243352
1.90457			0.902734						0.531985	0.403742	1.24949
0.571612			1.08881						1.8671	0.647299	0.434
1.01688			0.138636						2.42671	0.368917	0.33388
1.30881			0.377131						0.560143	1.23908	0.730055
1.65948			0.675352						0.603102	0.548992	0.403742
1.26531			0.392122						0.697668	0.0876812	1.09453
0.763513			0.196061						0.377131	0.377131	1.00672
1.97079			0.603102						1.7996	0.593464	1.63977
1.11772			0.404776						1.56499	1.14894	0.175362
0.49986			0.595993						0.330442	0.413154	1.15934
0.843291			0.538386						0.589508	0.341877	7.29978
0.721457			0.243352						0.196061	0.531985	0.423344
0.693181			0.062						3.73169	0.605591	8.16058
0.760918			0.299953						5.10613	3.82293	0.849249
0.780864			0.670633						0.496	0.562821	0.561434
0.71342			0.793075						0.218376	2.56205	0.223544
0.645532			0.458227						0.265992	3.31084	0.584907
0.752747			1.44561						0.175362	3.78585	1.38692
0.772904			0.743102						0.361519	0.280071	0.235321
0.744			0.830443						0.389199	0.451367	1.23534
0.925075			0.374091						0.280071	0.20939	2.42514
1.23766			0.606373						0.265992	0.603102	0.65146
2.17663			0.389199						1.42279	6.98663	0.470642
1.26858			0.186						0.330442	0.389199	0.316139
2.07074			0.0876812						1.66767	4.45533	0.062
0.593464			0.862786						0.481871	1.00672	0.605591
2.09693			0.138636						0.372	0.368917	1.73534
1.10587			0.392122						0.538386	2.07899	2.11133
1.66825			1.14322						0.670633	1.18206	0.409497
1.23766			0.682						0.368917	0.603195	0.790648
0.746579			0.316139						0.324574	0.196061	0.806
1.63405			0.392122						1.09425	0.866683	0.341877
0.753302			0.0876812						0.413154	0.243352	2.41689
0.91225			0.243352						0.506063	0.649233	0.916271
1.2032			0.361519						0.368917	0.65146	0.486703
0.684812			0.815483						1.096	1.4172	0.255633
0.529728			0.968471						2.11474	0.243352	0.368917
2.85259			0.062						0.440182	0.438406	0.243352
2.26099			0.511265						6.55706	7.16706	1.50677
2.57847			0.138636						0.277272	0.605591	0.404776
2.03373			2.34701						0.392122	0.265992	0.659069
1.64344			0.31						0.56961	0.645532	0.196061
1.28955									2.01523	0.647299	0.770413
1.6011									0.868	0.20939	0.668927
1.05877									0.265992	0.991326	8.40457
0.561434									1.07677	0.426882	0.512788
1.22032									0.752747	0.330442	0.444527
0.750821									0.277272	0.523912	0.539162
1.05519									0.403742	0.862786	2.54427
2.06993									1.26854	0.248	0.235321
1.37312										5.00086	0.299953
2.48224										4.59423	0.389199
2.23336										0.99972	0.489784
										9.29537	0.440182
										0.83985	0.549753
										0.196061	0.481871
										3.11706	0.2
										0.65146	2.5643
										3.73992	0.138636
										1.01688	0.138636
										0.849249	0.426882
										0.138636	0.523912
										0.403742	0.31
										0.396994	0.49986
										2.37864	0.990848
										0.434	0.56961
										1.84694	3.09356
										0.341877	0.330442
										8.15214	0.062
										0.404776	0.62
										0.20939	0.866683
										4.7326	0.138636
										1.80547	0.223544
										0.808381	1.56112
										4.68495	2.15935
										0.299953	0.350725
										0.477866	0.484235
										0.341877	1.5122
										0.324574	0.299953
										0.299953	2.33832
										0.436752	3.47401
										0.243352	0.561434
										0.361519	0.255633
										1.92061	0.621257
										0.56961	1.99557
										1.89319	1.1543
										7.09215	3.39284
										2.49151
										0.461498
										0.196061
										0.403742
										0.584907
										0.413154
										1.66641
										2.22725
										0.324574
										0.62808
										0.196061
										0.31
										0.445466
										0.884437
										7.18329
										0.124
										0.49986
										0.196061
										0.196061
										0.368917
										1.32631
										0.677492
										0.175362
										1.34041
										0.603102
										0.31
										0.243352
										0.265992
										0.749149
										0.526087
										1.65221
										0.280071
										1.43356
										5.54054
										0.392122
										7.00973
										3.19223
										2.16156
										0.729978
										0.506063
										0.138636
										0.31
										0.529728
										0.31
										1.02891
										2.53984
										0.521034
										0.20939
										0.451367
										0.255633
										0.368917
										0.444527
										0.589508
										3.90496
										0.649147
										0.496
										0.255633
										0.486703
										0.243352
										0.299953
										0.649147
										0.265992
										0.062
										0.223544
										0.280071
										0.223544
										0.330442
										2.88788
										0.506063
										7.04498
										0.280071
										0
										0.493692
										0
										0.870211
										0.196061
										2.21469
										0.368917
										0.186
										0.481871
										0.49986
										8.99643
										7.60644
										0.59276
										1.38582
										4.51479
										0.255633
										0.49986
										0.415909
										0.368917
										0.324574
										0.440182
										0.062
										0.280071
										7.09369
										0.474708
										0.426882
										0.273123
										0.248
										0.218376
										0.368917
										0.138636
										0.273123
										0.318597
										0.324574
										6.83425
										0.49986
										0.318597
										0.330442
										4.75401
										0.438406
										7.42226
										0.277272
										0.843291
										0.422355
										0.20939
										0.493692
										0.447088
										0.566226
										0.663156
										0.688747
										0.706909
										0.943146
										0.554545
										0.389199
										0.223544
										0.605591
										0.49986
										0.642548
										1.11772
