# Supplementary material for: A dual role for Cav1.4 Ca2+ channels in the molecular and structural organization of the rod photoreceptor synapse
Source: eLife. 2020 Sep 17;9:e62184. doi: 10.7554/eLife.62184 (PMC7561352; doi:10.7554/eLife.62184)
Supplement: Figure 1—source data 1. — Individual values obtained for peak ICa in different cells are listed in the ‘.xlsx’ file. [file elife-62184-fig1-data1.xlsx]

## Sheet: Rod V-ramp peak amplitudes
Peak Current (pA)
WT	KO	KI
4.82	-0.106592	-0.764841
3.12	-0.584629	0.110477
1.76	0.274059	0.069127
6.66	0.117254	0.903347
5.19	0.05799	0.239331
1.72		-0.740058
1.16		-0.217089
5.42
1.38
