# Supplementary figures and images for: A dual role for Cav1.4 Ca2+ channels in the molecular and structural organization of the rod photoreceptor synapse
Source: eLife journal article supplement (doi:10.7554/elife.62184), 2020-09-17

# CPPG Puffs (WT)

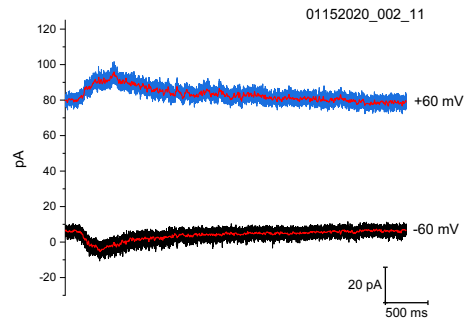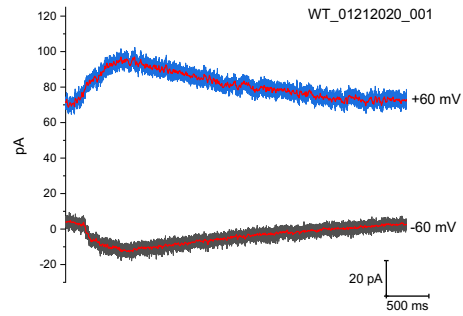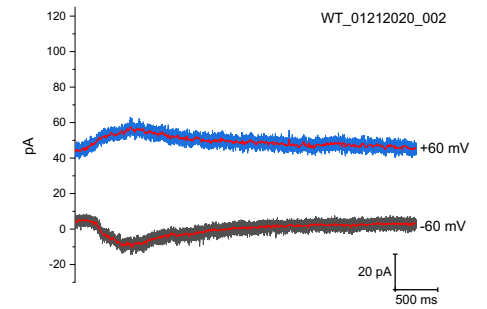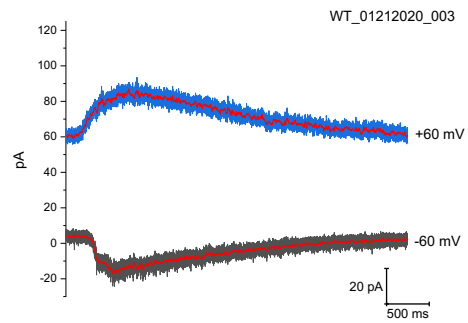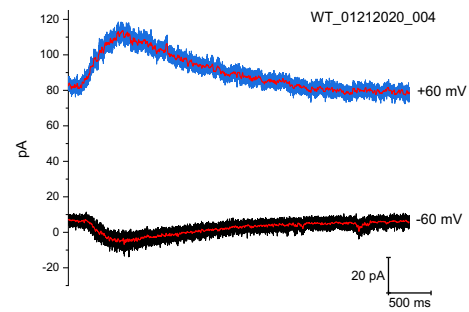

# CPPG Puffs (G369i KI)

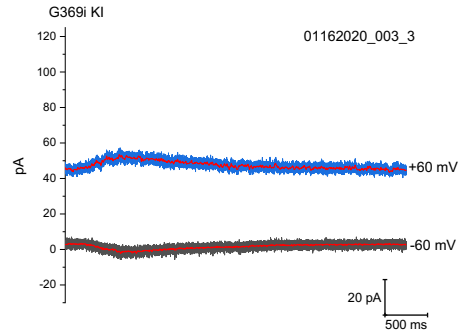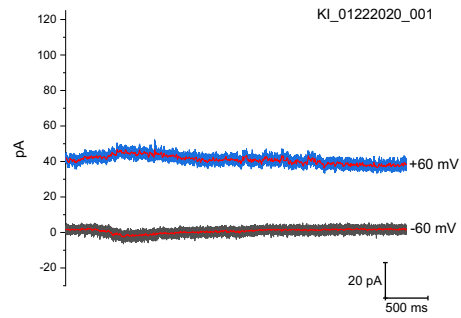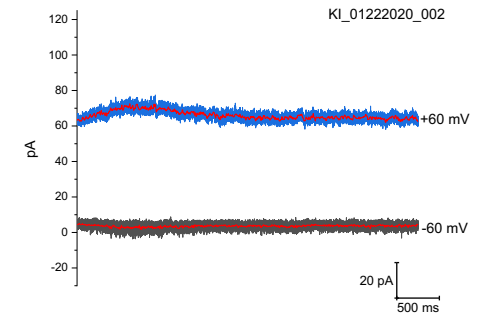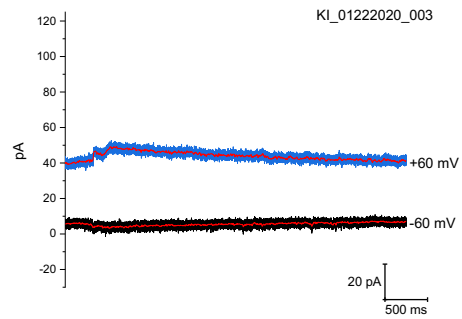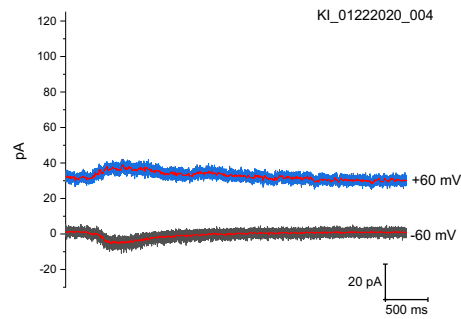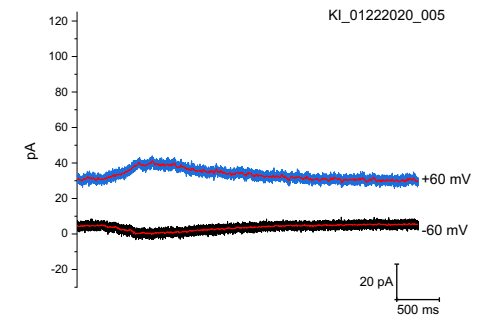

# CPPG Puffs ( $\text{Ca}_v1.4$ KO)

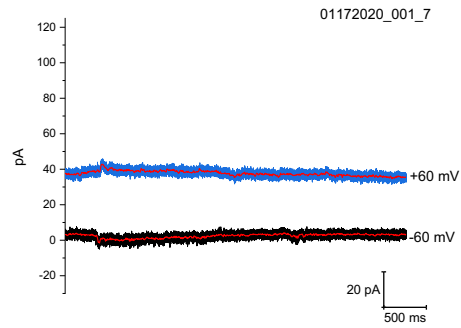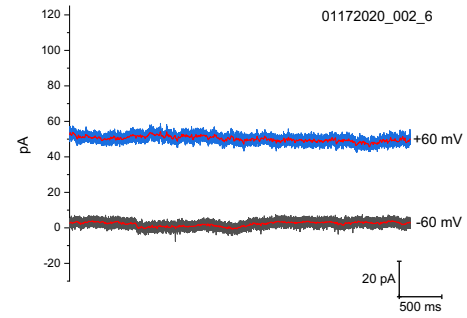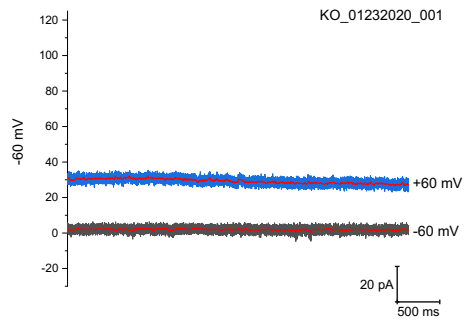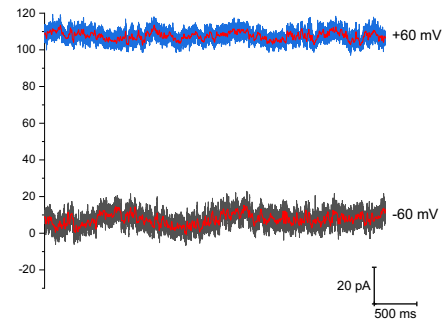

Supplement: fig3-data1 [file elife-62184-fig3-data1-v2.zip]
